# Supplementary material for: Quantifying world geography as seen through the lens of Soviet propaganda
Source: Research Square preprint supplement (doi:10.21203/rs.3.rs-5623774/v1), 2025-03-20
Supplement: Supplementary file 1 [file 99d60a1c2da5235ef44ef173.xlsx]

## Sheet: Model_Comparison
	Population	Geo	Specialization	Full
Cities	308	328	328	328
Number of parameters	2	16	9	15
Cities with p<0.0001 (*)	19	5	8	3
Cities with p<0.001	30	14	13	7
Cities with p<0.01	49	24	32	20
Cities with p<0.05	69	58	52	41
R^2	0.905	0.952	0.945	0.964
<sigma>(**)	4.08	2.89	3.12	2.53
(*) list of cities with p<0.0001
Overrepresented	Tallinn Bratsk Riga Sevastopol Yalta Rustavi Vilnius Cherepovets Minsk Volzhsky Qaragandy Volgograd St. Petersburg Chisinau Novorossiysk	Bratsk Cherepovets Yalta Rustavi Sevastopol	Qaragandy Vladimir Rustavi Bratsk Vilnius Minsk	Qaragandy Sumqayit Bratsk
Underrepresented	Ufa Perm Donetsk Dnipro		Kherson Samara
(**) average normalized deviation from expectation, expected to equal 1 if mentions are Poisson distributed variables with correctly determined expectation; see the supplementary material document

## Sheet: Master
Название, 1945-92	Current name	Республика	1959	1959_proper	1970	1970_proper	1979	1979_proper	население		Type1_3	Type_2	Type_4	All
Москва	Moscow	РСФСР	5085581	5045905	7061008	6941961	8010954	7830509	28.0436	27.5866	2831	116	28	2975
Ленинград	St Petersburg	РСФСР	3321196	2899955	3949501	3512974	4088458	4072528	15.9477	14.653	339	26	15	380
Киев	Kyiv	Украина	1104334	1104334	1631908	1631908	2143855	2143855	6.73984	6.73984	95	7	15	117
Ташкент	Tashkent	Узбекистан	911930	911930	1384509	1384509	1784880	1780002	5.63499	5.62879	45	5	0	50
Баку	Baku	Азербайджан	977130	642507	1264057	851547	1549830	1021969	5.27401	3.49967	38	1	1	40
Харьков	Kharkiv	Украина	934136	934136	1222852	1222852	1443754	1443754	5.01365	5.01365	43	6	0	49
Горький	Nizhny Novgorod	РСФСР	941962	941962	1175008	1170133	1349439	1344474	4.84021	4.82717	45	10	0	55
Новосибирск	Novosibirsk	РСФСР	894832	885045	1178863	1160963	1334125	1312480	4.75082	4.68298	33	4	0	37
Куйбышев	Samara	РСФСР	806356	806356	1050018	1044849	1223070	1216233	4.29067	4.27484	39	6	2	47
Свердловск	Yekaterinburg	РСФСР	796894	778602	1049532	1025045	1231872	1211172	4.28609	4.1968	28	8	0	36
Днепропетровск	Dnipro	Украина	711137	661547	917074	862100	1080117	1066016	3.77353	3.60063	16	7	0	23
Донецк/Сталино	Donetsk	Украина	728070	704821	899403	878590	1046461	1020799	3.73339	3.63494	12	9	0	21
Тбилиси	Tbilisi	Грузия	703016	694664	891928	889020	1069257	1066022	3.71208	3.69062	38	0	0	38
Минск	Minsk	Белоруссия	515975	515975	916949	907104	1275798	1261869	3.71072	3.67942	72	4	4	80
Одесса	Odesa	Украина	671496	667182	921866	891546	1046133	1046133	3.67364	3.62494	48	11	0	59
Челябинск	Chelyabinsk	РСФСР	689049	689049	889539	875210	1045700	1029522	3.65653	3.61619	49	9	0	58
Казань	Kazan	РСФСР	646806	646806	868537	868537	992765	992675	3.49281	3.4927	17	0	8	25
Пермь/Молотов	Perm	РСФСР	629118	629118	858249	850324	1007237	999157	3.4688	3.44759	8	7	2	17
Омск	Omsk	РСФСР	581108	581108	832514	821151	1031814	1014246	3.38793	3.34992	30	12	1	43
Волгоград/Сталинград	Volgograd	РСФСР	593844	593844	826051	817647	941585	928692	3.28459	3.25661	62	15	0	77
Ростов-на-Дону	Rostov-on-Don	РСФСР	599542	599542	788827	788827	934095	934095	3.23283	3.23283	16	21	0	37
Ереван	Yerevan	Армения	509340	509340	769712	766705	1025959	1019213	3.17933	3.1666	27	3	0	30
Уфа	Ufa	РСФСР	546878	546878	770905	770905	969289	969289	3.16881	3.16881	5	0	0	5
Саратов	Saratov	РСФСР	584092	584092	757330	757330	855702	855702	3.06503	3.06503	19	20	0	39
Рига	Riga	Латвия	580423	580423	731831	731831	835475	835475	2.99828	2.99828	73	10	3	86
Алма- Ата	Almaty	Казахстан	457709	457709	729633	729633	913837	909644	2.89904	2.89371	25	4	0	29
Воронеж	Voronezh	РСФСР	454336	447164	683713	660182	813274	782950	2.70243	2.61996	23	17	0	40
Запорожье	Zaporizhzhia	Украина	434638	434638	657890	657890	780745	780745	2.59401	2.59401	16	4	0	20
Красноярск	Krasnoyarsk	РСФСР	419333	412375	648113	648113	808955	796305	2.59197	2.56478	47	19	0	66
Кривой Рог	Kryvyi Rih	Украина	409782	387579	634645	573174	704844	650113	2.42574	2.23592	25	0	0	25
Львов	Lviv	Украина	422479	410678	574903	553452	691221	667243	2.3463	2.26738	27	5	0	32
Ярославль	Yaroslavl	РСФСР	407071	407071	517314	517314	596651	596951	2.12201	2.12239	19	3	5	27
Караганда	Qaragandy	Казахстан	397083	397083	523271	523271	571877	571877	2.08277	2.08277	41	3	0	44
Краснодар	Krasnodar	РСФСР	358644	313110	514074	464147	621095	560438	2.07133	1.85265	11	21	1	33
Новокузнецк/Сталинск	Novokuznetsk	РСФСР	393416	376730	511421	499183	555023	541356	2.03914	1.97825	5	0	0	5
Тула	Tula	РСФСР	355954	315639	516937	461965	568633	514008	2.00426	1.79462	20	12	0	32
Макеевка	Makiivka	Украина	417342	357575	480002	392250	481654	436020	1.94069	1.66624	6	0	0	6
Иркутск	Irkutsk	РСФСР	365893	365893	450941	450941	549787	549787	1.90514	1.90514	12	12	0	24
Барнаул	Barnaul	РСФСР	310484	305046	466982	439134	571789	533263	1.8668	1.77072	4	0	0	4
Владивосток	Vladivostok	РСФСР	299378	290608	449416	440889	557800	549789	1.80706	1.77111	20	0	0	20
Хабаровск	Khabarovsk	РСФСР	322744	322744	435962	435962	527848	527848	1.78771	1.78771	16	10	0	26
Кемерово	Kemerovo	РСФСР	342030	277671	415430	384989	500171	470640	1.75498	1.57271	3	3	0	6
Жданов/Мариуполь	Mariupol	Украина	295790	283570	434755	416927	523187	502581	1.73709	1.66679	14	1	0	15
Ижевск/Устинов	Izhevsk	РСФСР	285294	285294	422409	422409	548721	548721	1.73579	1.73579	4	1	0	5
Иваново	Ivanovo	РСФСР	335161	335161	419639	419639	464526	464526	1.70448	1.70448	20	5	0	25
Фрунзе	Bishkek	Киргизия	223831	223831	430618	430618	532931	532931	1.62892	1.62892	8	0	0	8
Астрахань	Astrakhan	РСФСР	295768	295768	410473	410473	461003	461003	1.62448	1.62448	14	9	0	23
Ворошиловград/Луганск	Luhansk	Украина	274520	274520	404032	382774	483850	463047	1.61074	1.55497	8	2	0	10
Нижний Тагил	Nizhny Tagil	РСФСР	356766	338501	378410	378410	398146	398146	1.59769	1.56853	28	2	0	30
Пенза	Penza	РСФСР	255481	255481	373650	373650	482916	482916	1.53727	1.53727	12	3	1	16
Магнитогорск	Magnitogorsk	РСФСР	319110	311101	364209	364209	406074	406074	1.52808	1.5153	25	0	0	25
Таллин	Tallinn	Эстония	281714	281714	369583	362706	442960	429727	1.52271	1.4964	44	1	0	45
Душанбе/Сталинабад	Dushanbe	Таджикистан	227137	224242	375774	373885	495342	493528	1.51076	1.50122	15	0	0	15
Вильнюс	Vilnius	Литва	236078	236078	372100	372100	480998	480998	1.50172	1.50172	35	1	0	36
Оренбург/Чкалов	Orenburg	РСФСР	267317	267317	344266	344266	464640	458747	1.4924	1.4849	10	25	0	35
Кишинев	Chisinau	Молдавия	216005	216005	360228	356382	510814	502770	1.49123	1.47569	28	0	1	29
Горловка	Horlivka	Украина	333131	292616	350402	335064	358057	336487	1.47035	1.3571	1	0	0	1
Архангельск	Arkhangelsk	РСФСР	272650	256309	376782	342590	385028	385028	1.44449	1.37126	5	2	1	8
Калинин	Tver	РСФСР	260974	260974	345112	345112	415076	411548	1.4204	1.41591	14	5	0	19
Рязань	Ryazan	РСФСР	217013	214130	353121	350151	456659	453267	1.41416	1.40115	11	17	0	28
Ульяновск	Ulyanovsk	РСФСР	205942	205942	351085	351085	463964	463964	1.40297	1.40297	15	7	0	22
Томск	Tomsk	РСФСР	248823	248823	338389	338389	420730	420730	1.39892	1.39892	6	4	0	10
Николаев	Mykolaiv	Украина	226207	226207	331037	331037	451741	439915	1.39213	1.37709	11	1	1	13
Киров	Kirov	РСФСР	252416	252416	343668	332503	401620	389533	1.38763	1.35686	8	5	0	13
Самарканд	Samarkand	Узбекистан	202497	196484	275990	266815	513393	476929	1.35678	1.28815	3	2	0	5
Брянск	Bryansk	РСФСР	219124	207319	340922	317504	416962	394210	1.35022	1.27014	11	5	0	16
Грозный	Grozny	РСФСР	251718	242068	341259	341259	375326	375326	1.34976	1.33435	7	2	0	9
Мурманск	Murmansk	РСФСР	221874	221874	308642	308642	380817	380817	1.26412	1.26412	6	5	1	12
Каунас	Kaunas	Литва	214348	214348	305116	305116	370419	370419	1.23402	1.23402	10	0	0	10
Липецк	Lipetsk	РСФСР	166714	156515	308490	289138	425642	395638	1.23288	1.15175	6	1	0	7
Курск	Kursk	РСФСР	204712	204712	284162	284162	375345	375345	1.19601	1.19601	19	22	1	42
Калининград	Kaliningrad	РСФСР	203570	203570	296962	296962	354788	354788	1.18569	1.18569	8	2	0	10
Гомель	Gomel	Белоруссия	174706	168270	282390	272253	393723	382785	1.16904	1.13088	3	1	0	4
Прокопьевск	Prokopyevsk	РСФСР	281958	281958	274485	274485	266167	266167	1.16711	1.16711	2	0	0	2
Тольятти/Ставрополь-на-Волге	Tolyatti	РСФСР	74987	61281	256885	250853	507973	502036	1.12001	1.08226	8	0	0	8
Херсон	Kherson	Украина	157995	157995	279878	260687	342789	318908	1.07413	1.01729	1	10	0	11
Тюмень	Tyumen	РСФСР	150195	150195	268526	268526	358992	358992	1.06663	1.06663	6	20	0	26
Симферополь	Simferopol	Украина	187623	187623	255041	249053	310315	301505	1.04587	1.0264	4	0	0	4
Ашхабад	Ashgabat	Туркменистан	173003	169935	256224	253118	315850	312024	1.0312	1.01715	9	2	1	12
Таганрог	Taganrog	РСФСР	202062	202062	254154	254154	276444	276444	1.02461	1.02461	6	0	0	6
Улан-Удэ	Ulan-Ude	РСФСР	175172	175172	253569	253569	304260	300370	1.01626	1.01131	2	0	0	2
Дзержинск	Dzerzhinsk	РСФСР	182264	164337	280119	221291	257119	257119	1.00424	0.894497	0	0	0	0
Чимкент	Shymkent	Казахстан	153241	153241	247064	247064	321535	321535	0.994254	0.994254	8	15	0	23
Чита	Chita	РСФСР	171816	171816	241364	241364	302577	302577	0.991932	0.991932	0	1	0	1
Днепродзержинск	Kamianske	Украина	201799	194188	235650	226998	258306	250120	0.975606	0.941114	15	0	0	15
Севастополь	Sevastopol	Украина	150521	148033	240958	228904	315917	300686	0.974347	0.934382	29	0	0	29
Орджоникидзе/Дзауджикау	Vladikavkaz	РСФСР	164420	164420	243759	236200	289117	278930	0.96631	0.94293	10	0	0	10
Курган	Kurgan	РСФСР	145712	145712	243850	243850	309863	309863	0.962959	0.962959	5	3	0	8
Владимир	Vladimir	РСФСР	153865	153865	237924	234087	304821	296371	0.961389	0.94535	18	7	0	25
Семипалатинск	Semey	Казахстан	158555	156110	243307	235735	289958	282574	0.957394	0.933659	1	2	0	3
Смоленск	Smolensk	РСФСР	160019	147196	230599	210779	299249	276402	0.954024	0.877165	5	6	0	11
Орел	Oryol	РСФСР	151521	151521	232216	232216	304971	304971	0.949966	0.949966	5	7	0	12
Витебск	Vitebsk	Белоруссия	148300	148300	230804	230804	300786	296605	0.937555	0.932238	10	1	0	11
Комсомольск-на-Амуре	Komsomolsk-on-Amur	РСФСР	184971	177278	220766	218127	263950	263950	0.935398	0.919479	6	0	0	6
Тамбов	Tambov	РСФСР	172171	172171	229791	229791	270073	270073	0.935199	0.935199	1	7	0	8
Кострома	Kostroma	РСФСР	171720	171720	230870	223042	267978	254725	0.933303	0.905652	5	5	0	10
Шахты	Shakhty	РСФСР	196190	196190	228357	205307	234458	209495	0.926264	0.862729	1	0	0	1
Чебоксары	Cheboksary	РСФСР	104374	104374	255003	216139	313393	307599	0.916844	0.855882	6	0	0	6
Орск	Orsk	РСФСР	178137	176214	225314	225314	246667	246667	0.908779	0.90571	3	0	14	17
Усть-Каменогорск	Oskemen	Казахстан	150371	150371	230340	230340	274287	274287	0.906518	0.906518	11	1	0	12
Рыбинск/Андропов	Rybinsk	РСФСР	181685	181685	218282	218282	238579	238579	0.894459	0.894459	2	0	0	2
Полтава	Poltava	Украина	143097	143097	219873	219873	278931	278931	0.88638	0.88638	4	5	0	9
Винница	Vinnytsia	Украина	121854	121854	211572	211572	314446	314446	0.886194	0.886194	6	41	0	47
Могилев	Mogilev	Белоруссия	121712	121712	202314	202314	290631	290361	0.842911	0.842568	1	4	0	5
Калуга	Kaluga	РСФСР	134235	134235	210906	210906	265013	265013	0.842167	0.842167	6	5	4	15
Сочи	Sochi	РСФСР	95234	81912	227876	224031	290996	287353	0.836361	0.80516	16	1	0	17
Ставрополь	Stavropol	РСФСР	141023	141023	198251	198251	258233	258233	0.826928	0.826928	7	39	1	47
Ангарск	Angarsk	РСФСР	134390	134390	209016	203310	244081	238802	0.813186	0.798603	6	0	0	6
Махачкала	Makhachkala	РСФСР	119334	119334	199332	185863	266445	251371	0.804242	0.766497	1	0	0	1
Петрозаводск	Petrozavodsk	РСФСР	145451	135256	191790	184481	234103	234103	0.794396	0.768043	3	0	0	3
Вологда	Vologda	РСФСР	143533	139137	183842	177751	243193	236537	0.791935	0.768053	5	2	0	7
Краматорск	Kramatorsk	Украина	147913	115385	193460	149832	219112	178163	0.781562	0.617396	2	0	0	2
Кировабад	Ganja	Азербайджан	138239	116122	190188	189512	232520	231901	0.778662	0.741638	4	0	0	4
Воркута	Vorkuta	РСФСР	175857	55668	182779	89742	193047	100210	0.778287	0.340066	8	0	0	8
Саранск	Saransk	РСФСР	91034	91034	201026	190575	277348	263337	0.775272	0.74304	3	0	0	3
Джамбул	Taraz	Казахстан	113346	113346	187164	187164	263793	263793	0.774531	0.774531	0	4	0	4
Павлодар	Pavlodar	Казахстан	90096	90096	196223	187070	282325	272895	0.773482	0.748866	10	5	0	15
Бийск	Biysk	РСФСР	146416	146416	190531	186344	216494	211567	0.771804	0.759764	2	0	0	2
Стаханов/Кадиевка	Kadiivka	Украина	253878	180205	139194	137138	136880	108043	0.771286	0.614176	0	0	0	0
Кировоград	Kropyvnytskyi	Украина	128207	128207	188795	188795	239660	236652	0.769808	0.765983	0	1	0	1
Черновцы	Chernivtsi	Украина	141940	141940	186812	186812	218561	218561	0.76216	0.76216	1	0	0	1
Андижан	Andijan	Узбекистан	130912	130912	188005	188005	229923	229923	0.760653	0.760653	2	2	0	4
Златоуст	Zlatoust	РСФСР	161342	161342	180488	180488	197760	197760	0.757953	0.757953	0	0	0	0
Череповец	Cherepovets	РСФСР	92356	92356	188348	188348	265933	265933	0.745381	0.745381	18	0	0	18
Наманган	Namangan	Узбекистан	123467	123467	175267	175267	226950	226950	0.727422	0.727422	0	1	0	1
Енакиево	Yenakijeve	Украина	147784	92306	181432	92131	181756	114163	0.717259	0.419588	1	0	0	1
Норильск	Norilsk	РСФСР	123513	109442	159206	135487	234633	180358	0.715119	0.59092	14	0	0	14
Ленинск-Кузнецкий	Leninsk-Kuznetsky	РСФСР	170946	132156	167278	127747	165062	132124	0.713479	0.555156	1	0	0	1
Целиноград/Акмолинск	Astana	Казахстан	102276	102276	181322	179514	235677	233638	0.713046	0.707959	7	4	1	12
Стерлитамак	Sterlitamak	РСФСР	111575	111575	184894	184894	220122	220122	0.713031	0.713031	0	0	0	0
Петропавловск	Petropavl	Казахстан	131453	131453	172911	172911	206559	206559	0.710986	0.710986	1	1	0	2
Сызрань	Syzran	РСФСР	148391	148391	173347	173347	178498	178498	0.702934	0.702934	1	0	0	1
Житомир	Zhytomyr	Украина	105583	105583	160936	160936	243764	243764	0.700497	0.700497	2	4	0	6
Каменск-Уральский	Kamensk-Uralsky	РСФСР	141019	141019	169270	169270	187401	187401	0.696868	0.696868	1	0	0	1
Подольск	Podolsk	РСФСР	129429	129429	168706	168706	201769	201769	0.695864	0.695864	2	0	0	2
Новочеркасск	Novocherkassk	РСФСР	123092	95453	172633	162365	196672	183055	0.684682	0.609085	0	0	0	0
Кутаиси	Kutaisi	Грузия	128203	128203	162787	160937	194297	194297	0.676242	0.673691	2	0	0	2
Сумы	Sumy	Украина	98015	98015	166467	159168	228174	228174	0.676216	0.666151	3	0	0	3
Чернигов	Chernihiv	Украина	89775	89585	159071	158873	238141	238141	0.665541	0.664965	3	1	0	4
Ленинакан	Gyumri	Армения	108446	108446	164966	164966	206613	206613	0.663374	0.663374	1	0	0	1
Копейск	Kopeysk	РСФСР	160713	160713	155799	155799	145905	145905	0.656951	0.656951	2	0	0	2
Петропавловск-Камчатский	Petropavlovsk-Kamchatsky	РСФСР	85582	85582	163388	153885	225774	214977	0.649072	0.622235	8	0	0	8
Братск.	Bratsk	РСФСР	51455	51455	185223	155362	244073	213725	0.647982	0.568205	23	0	0	23
Черкассы	Cherkasy	Украина	84822	84822	158393	158393	228197	228197	0.644053	0.644053	1	3	0	4
Темиртау	Temirtau	Казахстан	76725	76725	166479	166479	225497	213026	0.638845	0.622983	4	0	0	4
Белгород	Belgorod	РСФСР	72278	72278	151336	151336	239814	239814	0.629073	0.629073	7	4	0	11
Йошкар-Ола	Yoshkar-Ola	РСФСР	88744	88744	166073	166073	201371	201371	0.626785	0.626785	2	0	0	2
Нальчик	Nalchik	РСФСР	87617	87617	145690	145690	222708	207406	0.624015	0.604553	2	0	0	2
Энгельс	Engels	РСФСР	105892	90724	153107	130066	188770	161349	0.62025	0.52939	2	1	0	3
Красный Луч	Khrustalnyi	Украина	97945	93764	175111	102636	169317	105946	0.613167	0.425951	1	0	0	1
Кременчуг	Kremenchuk	Украина	86569	86569	148117	148117	209616	209616	0.609038	0.609038	9	0	0	9
Белово	Belovo	РСФСР	121647	106894	152702	108209	159943	111819	0.608176	0.462065	0	0	0	0
Березники	Berezniki	РСФСР	106119	106119	145580	145580	185395	185395	0.60594	0.60594	5	0	0	5
Актюбинск	Aktobe	Казахстан	96680	96680	149914	149914	190569	190569	0.603431	0.603431	2	4	0	6
Новороссийск	Novorossiysk	РСФСР	106997	93461	146352	132744	174380	159135	0.594397	0.534635	13	0	0	13
Уральск	Oral	Казахстан	103914	103914	140015	134162	185092	167352	0.594361	0.563727	0	2	0	2
Волжский	Volzhsky	РСФСР	66965	66965	150149	142058	217024	209150	0.58997	0.568798	14	0	0	14
Бобруйск	Babruysk	Белоруссия	97530	97530	137536	137536	192207	192207	0.589801	0.589801	1	0	0	1
Армавир	Armavir	РСФСР	110994	110994	145384	145384	161539	161539	0.58311	0.58311	0	0	0	0
Рубцовск	Rubtsovsk	РСФСР	111357	111357	144951	144951	157082	157082	0.577424	0.577424	1	0	0	1
Северодвинск	Severodvinsk	РСФСР	78657	78657	144672	144672	197232	197232	0.575908	0.575908	0	0	0	0
Первоуральск	Pervouralsk	РСФСР	118263	90424	139093	116646	152566	129189	0.574625	0.469502	2	0	0	2
Миасс	Miass	РСФСР	111106	99043	138345	131331	156475	150179	0.567141	0.530206	2	0	0	2
Клайпеда	Klaipeda	Литва	91989	89923	140723	140012	175834	175834	0.564528	0.560249	5	0	0	5
Славянск	Slovyansk	Украина	97876	82784	144604	124183	162302	140256	0.562066	0.481776	1	0	0	1
Киселевск	Kiselevsk	РСФСР	130697	130697	132879	126616	127364	121881	0.55385	0.53824	1	0	0	1
Фергана	Fergana	Узбекистан	80206	80206	142868	111311	175794	175794	0.548626	0.505109	2	12	0	14
Гродно	Grodno	Белоруссия	72943	72943	132471	132471	194775	194775	0.546837	0.546837	1	1	0	2
Благовещенск	Blagoveshchensk	РСФСР	94746	94746	127757	127757	171997	171997	0.546168	0.546168	0	0	0	0
Коканд	Kokand	Узбекистан	105082	105082	133131	133131	152776	152776	0.545631	0.545631	1	0	0	1
Мелитополь	Melitopol	Украина	94670	94670	136860	136860	160664	160664	0.544186	0.544186	0	0	0	0
Люберцы	Lyubertsy	РСФСР	93255	93255	139401	139401	159563	159563	0.544031	0.544031	8	0	0	8
Новомосковск/Сталиногорск	Novomoskovsk	РСФСР	107856	107856	133892	133892	146807	146807	0.543517	0.543517	5	3	0	8
Сыктывкар	Syktyvkar	РСФСР	74469	64461	137210	125088	185047	170980	0.543435	0.492853	4	0	0	4
Сумгаит	Sumqayit	Азербайджан	60026	51485	135540	124490	204952	190112	0.543394	0.495648	10	0	0	10
Коломна	Kolomna	РСФСР	99693	99693	135934	135934	147295	147295	0.533923	0.533923	10	0	0	10
Керчь	Kerch	Украина	98769	98769	127608	127608	156827	156827	0.53309	0.53309	3	0	0	3
Уссурийск	Ussuriysk	РСФСР	104310	104310	128235	128235	146782	146782	0.530024	0.530024	0	0	0	0
Коммунарск/Ворошиловск	Alchevsk	Украина	129946	97561	122818	122818	119756	119756	0.529101	0.477408	2	0	0	2
Псков	Pskov	РСФСР	81270	81270	126711	126711	175724	175724	0.527955	0.527955	1	8	0	9
Новгород	Veliky Novgorod	РСФСР	60699	60669	132323	127944	192927	186003	0.524738	0.509845	6	8	0	14
Серпухов	Serpukhov	РСФСР	106387	106387	124293	124293	139717	139717	0.518917	0.518917	4	4	1	9
Кустанай	Kostanay	Казахстан	86382	86382	123517	123517	164500	164500	0.517435	0.517435	4	26	0	30
Брест	Brest	Белоруссия	73614	73614	121629	121629	177249	177249	0.510666	0.510666	5	2	1	8
Ковров	Kovrov	РСФСР	98563	98563	123307	123307	142860	142860	0.509066	0.509066	0	0	0	0
Орехово-Зуево	Orekhovo-Zuyevo	РСФСР	108297	108297	120133	120133	132301	132301	0.506797	0.506797	2	0	0	2
Якутск	Yakutsk	РСФСР	80006	74330	117975	107617	168115	152368	0.504213	0.460841	4	6	0	10
Электросталь	Elektrostal	РСФСР	96922	96922	123127	123127	139272	139272	0.501635	0.501635	9	0	0	9
Мытищи	Mytishchi	РСФСР	98606	98606	118653	118653	140656	140656	0.499914	0.499914	11	0	0	11
Бухара	Bukhara	Узбекистан	69254	69254	111600	111600	184960	184960	0.499684	0.499684	4	6	0	10
Никополь	Nikopol	Украина	82992	82992	124949	124949	145654	145654	0.490029	0.490029	1	1	0	2
Пятигорск	Pyatigorsk	РСФСР	69617	69617	132619	93085	151911	109901	0.487215	0.379267	6	2	0	8
Черемхово	Cheremkhovo	РСФСР	122833	122833	119144	98667	98489	76696	0.485632	0.429677	0	0	0	0
Ош	Osh	Киргизия	65197	65197	120374	120374	169146	169146	0.485194	0.485194	1	1	0	2
Ровно	Rivne	Украина	59598	59598	115541	115541	178956	178956	0.482069	0.482069	2	2	0	4
Новошахтинск	Novoshakhtinsk	РСФСР	103566	103566	116742	101500	119072	104152	0.477744	0.437749	0	0	0	0
Ялта	Yalta	Украина	84521	43994	111777	62170	147418	80098	0.476549	0.25783	15	2	0	17
Хмельницкий	Khmelnytskyi	Украина	62473	62473	112959	112959	171801	171801	0.473997	0.473997	0	6	0	6
Анжеро-Судженск	Anzhero-Sudzhensk	РСФСР	115628	115628	109548	106165	108444	105114	0.47356	0.464659	1	1	0	2
Чистяково/Торез	Chystiakove	Украина	111399	91549	113524	92897	109331	87209	0.473421	0.385155	0	0	0	0
Кзыл-Орда	Kyzylorda	Казахстан	65902	65902	122373	122373	156128	156128	0.472519	0.472519	0	0	0	0
Южно-Сахалинск	Yuzhno-Sakhalinsk	РСФСР	85510	85510	109975	105840	143350	139861	0.470469	0.460329	4	0	0	4
Набережные Челны/Брежнев	Naberezhnye Chelny	РСФСР	19103	19103	37923	37923	301381	301381	0.466101	0.466101	9	0	0	9
Чарджоу	Turkmenabat	Туркменистан	69856	66112	114017	96383	149838	140182	0.459308	0.416733	3	1	1	5
Артемовск	Bakhmut	Украина	83956	60626	121124	82342	123304	87084	0.457868	0.321081	1	0	0	1
Находка	Nakhodka	РСФСР	69505	63725	111534	103659	150698	133201	0.456417	0.414078	6	0	0	6
Белая Церковь	Bila Tserkva	Украина	70633	70633	108545	108545	151318	151318	0.454884	0.454884	0	0	0	0
Гурьев	Atyrau	Казахстан	78143	78143	114277	114277	130916	130916	0.448828	0.448828	1	0	0	1
Тирасполь	Tiraspol	Молдавия	62676	62676	113269	105232	149795	138698	0.446761	0.421564	3	0	0	3
Осинники	Osinniki	РСФСР	102935	68107	109828	61970	102436	59805	0.446044	0.270234	0	0	0	0
Майкоп	Maykop	РСФСР	82135	82135	110212	110212	127828	127828	0.445667	0.445667	2	0	0	2
Ногинск	Noginsk	РСФСР	94522	94522	103735	103735	118750	118750	0.444962	0.444962	0	1	0	1
Мичуринск	Michurinsk	РСФСР	89872	80653	109258	93623	116052	101239	0.441724	0.386608	0	0	0	0
Ивано-Франковск/Станислав	Ivano-Frankivsk	Украина	66456	66456	104971	104971	149747	149747	0.44129	0.44129	2	3	0	5
Лисичанск	Lysychansk	Украина	78041	37878	117752	117752	119487	119487	0.438921	0.374812	2	0	0	2
Калининград МО	Korolyov	РСФСР	41427	41427	126911	105945	150407	133470	0.432433	0.38198	1	0	0	1
Ленинабад	Khujand	Таджикистан	77465	77465	103217	103217	130353	130353	0.431778	0.431778	1	1	1	3
Константиновка	Kostyantynivka	Украина	88723	88723	105446	105446	112020	112020	0.429505	0.429505	0	0	0	0
Красноармейск Донец	Pokrovsk	Украина	47974	47974	128594	55044	137506	59864	0.428796	0.228621	0	0	0	0
Салават	Salavat	РСФСР	60667	60667	113932	113932	137237	137237	0.428496	0.428496	0	0	0	0
Батуми	Batumi	Грузия	82328	82328	100603	100603	122815	122815	0.426348	0.426348	5	1	0	6
Муром	Murom	РСФСР	71567	71567	107346	98839	128450	114270	0.425637	0.395871	0	1	0	1
Серов	Serov	РСФСР	97882	97882	100679	100679	101481	101481	0.424147	0.424147	4	0	0	4
Чирчик	Circhik	Узбекистан	65520	65520	107308	107308	131868	131868	0.420279	0.420279	0	0	0	0
Джезказган	Zhezqazghan	Казахстан	73494	32442	129634	62495	96021	89403	0.418203	0.251673	8	1	0	9
Маргилан	Margilan	Узбекистан	67990	67990	105243	95264	124620	110015	0.412156	0.37982	2	0	0	2
Кировакан	Vanadzor	Армения	49423	49423	106624	106624	146036	146036	0.411661	0.411661	0	0	0	0
Кизел	Kizel	РСФСР	125873	60687	87500	46264	68278	39831	0.408424	0.211327	0	0	0	0
Бельцы	Balti	Молдавия	67114	67114	101447	101447	125069	111565	0.406094	0.388919	0	0	0	0
Елец	Elets	РСФСР	77900	77900	100735	100735	111773	111773	0.405419	0.405419	0	0	0	0
Котлас	Kotlas	РСФСР	73754	52608	99817	55661	116695	61454	0.403795	0.238891	2	0	0	2
Узловая	Uzlovaya	РСФСР	93954	53912	96535	61945	94284	64752	0.403009	0.253833	0	0	0	0
Луцк	Lutsk	Украина	55663	55663	96493	93863	141070	137344	0.401335	0.392969	0	0	0	0
Артем	Artyom	РСФСР	84805	55531	88624	61412	112204	68520	0.400287	0.260475	0	0	0	0
Кинешма	Kineshma	РСФСР	87214	87214	95603	95603	101326	101326	0.399922	0.399922	0	0	0	0
Харцызск	Khartsyzk	Украина	33641	33641	134430	51076	126437	57559	0.399887	0.197339	0	0	0	0
Рустави	Rustavi	Грузия	62395	62395	98210	98210	129084	129084	0.399204	0.399204	13	0	0	13
Орша	Orsha	Белоруссия	64537	64537	110984	100642	112397	112397	0.399015	0.384754	1	0	0	1
Барановичи	Baranavichy	Белоруссия	58064	58064	101472	101472	130647	130647	0.398777	0.398777	1	1	0	2
Бердянск	Berdyansk	Украина	65249	65249	100133	100133	122109	122109	0.39754	0.39754	0	0	0	0
Магадан	Magadan	РСФСР	62225	62225	92105	92105	131885	121250	0.394077	0.38055	6	4	0	10
Балаково	Balakovo	РСФСР	36428	36428	103495	103495	151560	151560	0.393629	0.393629	4	0	0	4
Канск	Kansk	РСФСР	82662	82662	94680	94680	100558	100558	0.390406	0.390406	0	0	0	0
Свердловск (Луганск обл)	Dovzhansk	Украина	62155	62155	98924	68304	121543	73847	0.390215	0.287327	0	0	0	0
Даугавпилс	Daugavpils	Латвия	65459	65459	100431	100431	115731	115731	0.390175	0.390175	1	0	0	1
Сухуми	Sokhumi	Грузия	64730	64730	101798	101798	114379	114379	0.389177	0.389177	9	0	0	9
Краснодон	Sorokyne	Украина	37952	37952	119415	69459	125053	47868	0.384303	0.217245	2	0	0	2
Соликамск	Solikamsk	РСФСР	82874	82874	88595	88595	101158	101158	0.383116	0.383116	1	0	0	1
Тернополь	Ternopil	Украина	52245	52245	84663	84663	143625	143625	0.382815	0.382815	3	1	0	4
Новокуйбышевск	Novokuybyshevsk	РСФСР	62755	62755	103707	103707	109029	109029	0.381852	0.381852	5	0	0	5
Загорск	Sergiyev Posad	РСФСР	73578	73578	92428	92428	107144	107144	0.381177	0.381177	0	1	0	1
Балхаш	Balkhash	Казахстан	74045	53031	110143	75965	87095	78145	0.380852	0.288794	3	0	0	3
Асбест	Asbest	РСФСР	72591	60053	93915	75508	105888	78673	0.380055	0.300044	1	0	0	1
Ачинск	Achinsk	РСФСР	53655	50323	101752	97001	120679	116854	0.379448	0.362713	1	0	0	1
Сарапул	Sarapul	РСФСР	68741	68741	97020	97020	106649	106649	0.379159	0.379159	1	0	0	1
Лиепая	Liepaja	Латвия	71464	71464	92884	92884	107663	107663	0.379091	0.379091	0	0	0	0
Абакан	Abakan	РСФСР	56416	56416	90136	90136	128311	128311	0.377543	0.377543	6	0	0	6
Кисловодск	Kislovodsk	РСФСР	77998	77998	89571	89571	100932	100932	0.376392	0.376392	3	0	0	3
Тарту	Tartu	Эстония	74263	74263	90459	90459	104518	104518	0.376215	0.376215	9	1	0	10
Шяуляй	Siauliai	Литва	59722	59722	93057	93057	118216	118216	0.374009	0.374009	2	0	0	2
Первомайск (Луганск обл)	Pervomaisk	Украина	43671	43671	131188	45779	95467	44525	0.372038	0.189467	0	0	0	0
Балашиха	Balashikha	РСФСР	57600	57600	92316	92316	117906	117906	0.369206	0.369206	3	0	0	3
Камышин	Kamyshin	РСФСР	56511	56511	97242	97242	111565	111565	0.366196	0.366196	4	0	0	4
Чапаевск	Chapayevsk	РСФСР	83263	83263	86099	86099	84607	84607	0.359245	0.359245	0	0	0	0
Борисов	Barysaw	Белоруссия	59208	59208	84112	84112	111672	111672	0.35253	0.35253	0	1	0	1
Рудный	Rudny	Казахстан	40324	36639	102981	96041	113794	109707	0.351107	0.330456	0	0	0	0
Троицк	Troitsk	РСФСР	76325	76325	85469	85469	87500	87500	0.350981	0.350981	2	0	0	2
Ревда	Revda	РСФСР	82300	54870	81090	59114	83044	62943	0.348812	0.249157	2	0	0	2
Химки	Khimki	РСФСР	47800	47800	86645	86645	117974	117974	0.345829	0.345829	1	0	8	9
Белорецк	Beloretsk	РСФСР	73349	59315	84236	67099	88433	71246	0.345717	0.277824	0	0	0	0
Феодосия	Feodosia	Украина	50640	46327	88571	64938	110573	76402	0.343605	0.26067	0	0	0	0
Гуково	Gukovo	РСФСР	52969	52969	93869	65105	100584	68080	0.341924	0.260918	0	0	0	0
Коркино	Korkino	РСФСР	84962	84962	81560	70890	73238	63253	0.341238	0.313824	5	0	0	5
Альметьевск	Almetyevsk	РСФСР	50949	50949	87092	87092	109579	109579	0.340795	0.340795	2	1	0	3
Великие Луки	Velikiye Luki	РСФСР	58939	58939	85281	85281	101505	101505	0.340782	0.340782	0	0	0	0
Новотроицк	Novotroitsk	РСФСР	57247	54484	88437	83439	98650	94647	0.338802	0.322408	0	0	0	0
Нукус	Nukus	Узбекистан	43616	39143	81283	74103	121641	108978	0.33642	0.303273	1	0	0	1
Батайск	Bataysk	РСФСР	65158	65158	85306	85306	90123	90123	0.336267	0.336267	0	0	0	0
Александров	Aleksandrov	РСФСР	54857	36738	89070	49911	98788	60391	0.336036	0.204278	0	0	0	0
Алмалык	Almalyk	Узбекистан	40480	40480	103684	81473	100733	100733	0.335713	0.305084	2	0	0	2
Балашов	Balashov	РСФСР	64349	64349	83110	83110	93067	93067	0.335692	0.335692	0	0	0	0
Каменск-Шахтинский	Kamensk-Shakhtinsky	РСФСР	60564	57525	87792	68135	92375	71598	0.335227	0.276843	1	0	0	1
Щелково	Shchyolkovo	РСФСР	62051	62051	78288	78288	100281	100281	0.334549	0.334549	3	0	0	3
Губаха	Gubakha	РСФСР	101683	93502	69470	33243	58412	32199	0.332399	0.236044	0	0	0	0
Лениногорск	Ridder	Казахстан	81838	66812	77533	72074	74023	68135	0.331696	0.292695	0	0	0	0
Кокчетав	Kokshetau	Казахстан	52909	52909	80564	80564	104932	103162	0.329011	0.32676	1	1	0	2
Ангрен	Angren	Узбекистан	55789	55789	76096	76096	105970	105970	0.328767	0.328767	1	0	0	1
Усолье-Сибирское	Usolye-Sibirskoye	РСФСР	48494	48494	86747	86747	103036	103036	0.328078	0.328078	0	0	0	0
Димитровград/Мелекесс	Dimitrovgrad	РСФСР	50696	50696	81350	81350	105958	105958	0.327867	0.327867	1	0	0	1
Александрия	Oleksandriia	Украина	59082	35190	82811	69416	93640	82059	0.327601	0.256263	0	0	0	0
Кузнецк	Kuznetsk	РСФСР	56880	56880	84102	84102	93642	93642	0.325869	0.325869	1	0	0	1
Ухта	Ukhta	РСФСР	36154	36154	87611	62923	114488	87467	0.324138	0.255726	2	0	0	2
Октябрьский	Oktyabrsky	РСФСР	64717	64717	77054	77054	88030	88030	0.321522	0.321522	0	0	0	0
Дзержинск (Донецк обла)	Toretsk	Украина	44835	44835	98034	46818	89498	44502	0.320584	0.192729	0	0	0	0
Павлоград	Pavlohrad	Украина	45827	45827	80227	80227	107267	107267	0.320211	0.320211	0	0	0	0
Лысьва	Lysva	РСФСР	77414	72989	72762	72762	74976	74976	0.319267	0.312204	0	0	0	0
Евпатория	Yevpatoriya	Украина	56992	56992	79444	79444	93281	93281	0.319165	0.319165	2	1	0	3
Кувша	Kuvsha	РСФСР	79344	46150	73896	43840	70936	43259	0.318774	0.18914	0	0	0	0
Междуреченск	Mezhdurechinsk	РСФСР	54513	54513	81739	81739	91296	91296	0.315848	0.315848	1	0	0	1
Клин	Klin	РСФСР	53322	53322	80875	80875	91487	91487	0.312999	0.312999	5	2	0	7
Невинномысск	Nevinnomyssk	РСФСР	39806	39806	85067	85067	103708	103708	0.312748	0.312748	2	0	0	2
Небит-Даг	Balkanabat	Туркменистан	50476	32903	77636	55631	97582	71284	0.311741	0.219899	1	0	0	1
Воткинск	Votkinsk	РСФСР	59666	59666	74088	74088	89779	89779	0.311594	0.311594	4	0	0	4
Зеленодольск	Zelenodolsk	РСФСР	60472	60472	76961	76961	84504	84504	0.310133	0.310133	0	0	0	0
Кунгур	Kungur	РСФСР	64796	64796	74488	74488	80143	80143	0.308078	0.308078	0	1	0	1
Вольск	Volsk	РСФСР	63422	63422	77996	69191	76032	65749	0.305494	0.280273	0	0	0	0
Шахтерск	Shakhtarsk	Украина	37687	37687	80503	65389	103317	69952	0.302575	0.239297	0	0	0	0
Ургенч	Urgench	Узбекистан	43756	43756	76165	76165	100010	100010	0.302074	0.302074	0	0	0	0
Бугульма	Bugulma	РСФСР	60980	60980	72449	72449	80460	80460	0.299578	0.299578	0	0	0	0
Бендеры	Bender	Молдавия	43109	43109	72321	72321	101292	101292	0.297371	0.297371	1	1	0	2
Паневежис	Panevezys	Литва	41096	41096	73328	73328	101519	101519	0.295835	0.295835	4	0	0	4
Кохтла-Ярве	Kohtla-Jarve	Эстония	40464	29188	82560	68318	87366	72675	0.289557	0.233233	0	0	0	0
Мары	Mary	Туркменистан	48125	48125	61738	61738	82769	74481	0.267225	0.256684	1	4	0	5
Ташауз	Dashoguz	Туркменистан	37869	37869	63077	63077	83750	83750	0.253949	0.253949	0	0	0	0
Нарва	Narva	Эстония	38591	27630	61346	57863	76983	72816	0.244107	0.216508	2	0	1	3
Елгава	Jelgava	Латвия	36359	36359	55297	55297	67599	67599	0.220268	0.220268	2	0	0	2
Юрмала	Jurmala	Латвия	37954	37954	53833	53833	60947	60947	0.212335	0.212335	1	0	0	1
Пярну	Parnu	Эстония	41029	36067	50224	46316	55622	51254	0.205494	0.186628	0	1	0	1
Пржевальск	Karakol	Киргизия	35424	32565	46394	42262	55741	50830	0.191416	0.174909	0	0	0	0
Джалал-Абад	Jalal-Abad	Киргизия	31234	31234	44285	44285	55369	55369	0.181347	0.181347	0	0	0	0
Шеки/Нуха	Sheki	Азербайджан	34348	34348	44369	43158	49475	49475	0.178937	0.177267	0	0	0	0
Токмак	Tokmok	Киргизия	28930	26559	42122	42122	58655	58655	0.178866	0.175081	0	0	0	0
Али-Байрамлы	Shirvan	Азербайджан	13427	13427	48696	33828	64671	41583	0.170837	0.120969	1	0	0	1
Куляб	Kulob	Таджикистан	23455	23455	39764	39764	54841	54841	0.162024	0.162024	0	0	0	0
Курган-Тюбе	Bokhtar	Таджикистан	27017	23560	34620	34620	42075	42075	0.144379	0.138861	1	0	0	1
Эчмиадзин	Vagharshapat	Армения	19699	19699	31819	31819	44040	44040	0.131335	0.131335	0	1	0	1
Ура-Тюбе	Istaravshan	Таджикистан	23839	23839	32523	32523	37662	37662	0.130802	0.130802	0	0	0	0
Рыбница	Ribnita	Молдавия	18649	18649	32266	32266	41795	41795	0.12742	0.12742	3	0	0	3
Кафан	Kapan	Армения	19315	19315	29916	29916	35889	35889	0.117731	0.117731	0	0	0	0
			208826650	208826650	241720134	241720134	262084654	262084654
Измаил	Izmail	Украина	48103	48103	70297	70297	83126	83126	0.279447	0.279447	1	0	0	1
Выборг	Vyborg	РСФСР	51088	51088	65188	65188	75573	75573	0.26756	0.26756	2	0	2	4
Туапсе	Tuapse	РСФСР	36650	36650	51385	51385	59843	59843	0.205473	0.205473	2	0	1	3
Нахичевань	Nakhchivan	Азербайджан	25340	25340	33279	33279	40384	40384	0.137703	0.137703	0	0	0	0

## Sheet: Seed_regions
Region	short_name	definition	No of cities	neighbours	Geomodel_allocation	Fulmodel_allocation
Armenia	Arm	Armenian SSR	5(3)	Georg, Azer	South-East	South-East
Azerbaijan	Azer	Azerbaijani SSR	5(3)	Georg, NCau, Turkm, Arm	South-East	South-East
Belarus	Belor	Belorussian SSR	10	Latv, Lith, NW, Kalining, Center, W_Ukr, C_Ukr, Slobo	West
Center	Cent	RSFSR: parts of Bryansk, Kalinin, Kaluga, Kostroma, Ivanovo, Ryazan, Smolensk, Tula, Vladimir, Yaroslavl oblasts which are more than 250 km from Moscow	6	NW, Volga, LM_Volga, Chernoz, Slobo, Belor, Mos_Bord	Center	Volga
Central Blacksoil	Chernoz	RSFSR: Belgord, Kursk, Lipetsk, Oryol, Tambov, Voronezh oblasts	8	Center, LM_Volga, L_Vol, Rostov, Donb, Slobo	Center
Crimea	Crimea	Ukrainian SSR: Crimean oblast	6	S_Ukr, Dnipr, South	South
Donbas	Donb	Ukrainian SSR: Luhansk, Donetsk oblasts	22	Dnipr, Slobo, Chernoz, Rostov	Don	Ukraine-centered
East Siberia	ESib	RSFSR: Buryat, Tyva ASSR, Krasnoyarsk krai (excluding autonomous districts), Chita, Irkutsk oblasts	11	ESib, East, NE	East
East Urals	EUral	RSFSR: Chelyabinsk, Kurgan, Sverdlovsk, Tyumen oblasts	18	WUral, NW, NE, WSib, NKaz	East Urals	Trans-Urals
Estonia	Est	Estonian SSR	5(2)	Lat, NW	Baltics
Far East	East	RSFSR: Khabarovsk, Primorye krais, Amur, Sakhalin oblasts	8	ESib, NE	East
Georgia	Georg	Georgian SSR	5	South, NCau, Arm, Azer	South
Kaliningrad	Kalining	Kaliningrad oblast of RSFSR	1	Lith, Belor	West
Kuban	South	RSFSR: Krasnodar, Stavropol krais	9	Crimea, Rostov, L_Volg, NCau, Georg	South
Kyrgyzstan	Kyrgyz	Kyrgyz SSR	5(2)	SKaz, Tajik, Uzb	South-East	South-East
Latvia	Latv	Latvian SSR	5(3)	Lith, Belor, Est, NW	Baltics
Leftbank Ukraine	Slobo	Ukrainian SSR: Chernihiv, Kharkiv, Poltava, Sumy oblasts	5	C_Ukr, Belor, Center, Chernoz, Donb, Dnipr	Ukraine
Lithuania	Lith	Lithuanian SSR	5(4)	Latv, Belor, Kalining	Baltics
Lower Dnipro	Dnipr	Ukrainian SSR: Dnipropetrovsk, Zaporizhzhia oblasts	8	S_Ukr, C_Ukr, Slobo, Donb, Crimea	Ukraine	Ukraine-centered
Lower Volga	L_Vol	RSFSR: Kalmyk ASSR, Astrakhan, Volgograd oblasts	4	Rostov, Chernoz, LM_Volga, WKaz, Ncau, South	South
Lower-Middle Volga	LM_Volga	RSFSR: Kuybyshev, Penza, Saratov, Ulyanovsk oblasts	14	Center, Volga, WUral, WKaz, L_Vol, Chernoz	Volga	Volga
Middle Volga	Volga	RSFSR: Chuvash, Mary, Mordovian, Tatar, Udmurt ASSR, Gorky and Kirov oblasts	11	Center, NW, WUral, LM_Volga	Volga	Volga
Moldova	Mold	Moldavian SSR	5(3)	W_Ukr, C_Ukr, S_Ukr	West
Moscow-200	Mos	up to 200 km from Moscow	21	Mos_Bord	Moscow	Moscow
Moscow-250	Mos_Bord	200 to 250 km from Moscow	4	Mos, Center	Center	Moscow
North Caucasus	NCau	RSFSR: Checheno-Ingushian, Dagestan, Kabardino-Balkarian, North Osetian ASSR	4	South, L_Volg, Azer	South-East
North East	NE	RSFSR: Yakut ASSR, Kamchatka, Magadan oblasts, autonomous districts of Krasnoyasrk krai	4	EUral, ESib, East	North East
Northern Kazakhstan	NKaz	Kazakh SSR: East-Kazakhstan, Karaganda, Kokchetav, Kustanay, North-Kazakhstan, Pavlodar, Semipalatinsk, Tselinograd oblasts	13	WUral, EUral, WSib, SKaz, WKaz	Northern Kazakhstan	Northern Kazakhstan
Nort-West	NW	RSFSR: Komi and Karelia ASSR; Arkhangelsk, Leningrad, Murmansk, Novgorod, Pskov and Vologda oblasts	14	Est, Lat, Cent, Volga, EUral, WUral	Center
Rightbank Ukraine	C_Ukr	Ukrainian SSR: Cherkasy, Kirovohrad, Khmelnytskyi, Kyiv, Vinnytsia, Zhytomyr oblasts	8	Belor, W_Ukr, Mold, S_Ukr, Slobo, Dnipr	Ukraine	Ukraine-centered
Rostov	Rost	RSFSR: Rostov oblast	8	Donb, Chernoz, L_Volg, South	Don	Ukraine-centered
Southern Kazakhstan	SKaz	Kazakh SSR: Alma-Ata, Chimkent, Dzhambul, Kzyl-Orda, Taldy-Kurgan oblasts	4	WKaz, NKaz, Kyrgyz, Uzb	South-East	South-East
Southern Ukraine	S_Ukr	Ukrainian SSR: Kherson, Mykolaiv, Odesa oblasts	3	Mold, C_Ukr, Dnipr, Crimea	Ukraine	Ukraine-centered
South-Western Siberia	WSib	RSFSR: Altay krai, Kemerovo, Novosibirsk, Omsk, Tomsk oblasts	15	EUral, ESib, NKaz	Western Siberia	Trans-Urals
Tajikistan	Tajik	Tajik SSR	5(2)	Uzb, Kyrgyz, Turkm	South-East	South-East
Turkmenistan	Turkm	Turkmen SSR	5(3)	Azer, WKaz, Uzb, Tajik	South-East	South-East
Uzbekistan	Uzb	Uzbek SSR	13	WKaz, SKaz, Kyrgyz, Tajik, Turkm	South-East	South-East
West Urals	WUral	RSFSR: Bashkir ASSR, Orenburg, Perm oblasts	17	NW, EUral, NKaz, WKaz, LM_Volga, Volga	West Urals	South-East
Western Kazakhstan	WKaz	Kazakh SSR: Aktybinsk, Guriev, Uralsk oblasts	3	WUral, NKaz, SKaz, Uzb, Turkm, L_Volg, LM_Volga	West Urals	South-East
Western Ukraine	W_Ukr	Ukrainian SSR: Chernivtsy, Ivano-Frankivsk, Lviv, Rivne, Ternopil, Volyn, Zakarpatie oblasts	6	Belor, C_Ukr, Mold	West
Administrative partitioning of the USSR as of 01.01.1970
Numbers in brackets are the number of cities with population above 0.03% of the USSR, if different from the whole number of cities in the dataset.
In order to increase connectivity and reflect historical connections, several connections are added, namely cross-sea connections between Azerbaijan and Turkmenistan (Baku-Krasnovodsk) and between Crimea and Kuban (across Kerch channel) and Lower Dnipro region (across Perekop/Azov sea); as well as connections between Kaliningrad and Belarus and between Turkmenistan and Tajikistan, which are separ…
		Moscow
		Volga
		South-East
		Ukraine
		N_Kaz
		TransUrals

## Sheet: Specializations
Specialization	short_name	# of cities	Is significant?
Capital of a Union-level republic	Rep_Capit	14	Yes
Capital of an Oblast or a Krai	Oblast	112	No
Capital of a national autonomy inside RSFSR	Аut_Rus_Cap	17	Yes
Capital of a national autonomy outside RSFSR	Aut_nonRus_cap	3	No
Other city inside a national autonomy	Autonom	10	No
Port on the Black sea	Black_sea	12	Yes, as part of "Black/Baltic/Pacific" group
Port on the Baltics sea	Balt	8	Yes, as part of "Black/Baltic/Pacific" group
Port on the Azov sea	Azov	5	No
Port on the Caspian sea	Kaspian	5	No
Port on the Arctic coast	North	3	No
Port on the Pacific coast	Pacific	4	No
Resort city	Recr	11	No
Huge hydroelectric power plant (>2 GW)	Hydro_big	5	Yes
Mid-size hydroelectric power plant (0.5-2 GW)	Hydro_med	10	No
Full-scale steelworks	Steelwork	18	Yes
Non-ferrous metallurgy	non-ferr	18	Yes
Automobile plant	Automob	14	No
Coal mining	Coal	38	Yes
Newsreel-producing film studio	Studio	26	No

## Sheet: Pop_only_pval
Название, 1945-92	Current name	Population	Mentions		expect	log_pval	pval	expect_NoSpb	log_pval_NoSpb	pval_NoSpb
Таллин	Tallinn	1.52271	44	1.523	11.6511	-25.0691	1.29607e-11	11.4493	-25.6185	7.48216e-12
Братск	Bratsk	0.647982	23	0.648	3.7359	-24.1678	3.19196e-11	3.97552	-22.9659	1.06178e-10
Рига	Riga	2.99828	73	2.998	28.6985	-23.4519	6.53084e-11	26.4766	-27.032	1.82034e-12
Севастополь	Sevastopol	0.974347	29	0.974	6.42633	-19.6909	2.8077e-09	6.58367	-19.1709	4.72263e-09
Уфа	Ufa	3.16881	5	3.169	30.8975	-17.6688	2.12099e-08	28.3584	-15.5425	1.77819e-07
Пермь/Молотов	Perm	3.4688	8	3.469	34.8505	-16.1027	1.01551e-07	31.718	-13.6965	1.12638e-06
Ялта	Yalta	0.476549	15	0.477	2.48483	-15.871	1.2803e-07	2.72078	-14.7291	4.01082e-07
Рустави	Rustavi	0.399204	13	0.399	1.95922	-14.9261	3.29365e-07	2.18126	-13.7344	1.08449e-06
Вильнюс	Vilnius	1.50172	35	1.502	11.4378	-14.6299	4.4291e-07	11.2542	-14.9964	3.07006e-07
Донецк/Сталино	Donetsk	3.73339	12	3.733	38.4243	-13.5752	1.27164e-06	34.7324	-11.051	1.58713e-05
Череповец	Cherepovets	0.745381	18	0.745	4.49811	-12.8689	2.57696e-06	4.72479	-12.1955	5.05314e-06
Минск	Minsk	3.71072	72	3.711	38.1232	-11.7943	7.54746e-06	34.4792	-15.2834	2.30411e-07
Волжский	Volzhsky	0.58997	14	0.59	3.29756	-10.8474	1.94551e-05	3.53986	-10.077	4.20353e-05
Караганда	Qaragandy	2.08277	41	2.083	17.6754	-10.576	2.55212e-05	16.8698	-11.6364	8.83844e-06
Волгоград/Сталинград	Volgograd	3.28459	62	3.285	32.4119	-10.4285	2.95774e-05	29.6489	-13.1007	2.0438e-06
Ленинград	St Petersburg	15.9477	339	15.948	265.464	-10.413	3.00394e-05	209.587	-34.4191	1.12713e-15
Кишинев	Chisinau	1.49123	28	1.491	11.3264	-10.0803	4.18968e-05	11.1523	-10.3492	3.20184e-05
Днепропетровск	Dnipro	3.77353	16	3.774	38.987	-9.85216	5.26334e-05	35.2052	-7.63531	0.000483089
Новороссийск	Novorossiysk	0.594397	13	0.594	3.32735	-9.29265	9.20987e-05	3.56959	-8.59952	0.000184194
Красноярск	Krasnoyarsk	2.59197	47	2.592	23.6452	-8.55958	0.0001917	22.1124	-10.1098	4.06789e-05
Нижний Тагил	Nizhny Tagil	1.59769	28	1.598	12.4209	-8.5322	0.000197021	12.1513	-8.89212	0.000137468
Мытищи	Mytishchi	0.499914	11	0.5	2.64556	-8.5096	0.000201524	2.88409	-7.77404	0.000420511
Владимир	Vladimir	0.961389	18	0.961	6.31242	-8.45665	0.000212483	6.47508	-8.14929	0.00028894
Тарту	Tartu	0.376215	9	0.376	1.81035	-8.38176	0.000229007	2.0267	-7.55659	0.000522654
Сочи	Sochi	0.836361	16	0.836	5.24381	-8.35085	0.000236196	5.44924	-7.92492	0.000361619
Норильск	Norilsk	0.715119	14	0.715	4.25864	-8.14632	0.0002898	4.49042	-7.61567	0.00049267
Сухуми	Sokhumi	0.389177	9	0.389	1.89413	-8.04855	0.000319565	2.11379	-7.25461	0.000706908
Горловка	Horlivka	1.47035	1	1.47	11.1146	-7.92701	0.000360864	10.9582	-7.78363	0.000416498
Кемерово	Kemerovo	1.75498	3	1.755	14.0711	-7.01764	0.000895937	13.6459	-6.67749	0.00125893
Магнитогорск	Magnitogorsk	1.52808	25	1.528	11.702	-6.94183	0.000966499	11.4959	-7.19313	0.000751733
Казань	Kazan	3.49281	17	3.493	35.1718	-6.84174	0.00106824	31.9899	-5.19106	0.0055661
Новокузнецк/Сталинск	Novokuznetsk	2.03914	5	2.039	17.1802	-6.73944	0.00118331	16.4298	-6.19673	0.00203608
Барнаул	Barnaul	1.8668	4	1.867	15.2787	-6.57987	0.00138803	14.7319	-6.16793	0.00209557
Коломна	Kolomna	0.533923	10	0.534	2.88766	-6.39934	0.00166265	3.12878	-5.81046	0.00299605
Набережные Челны/Брежнев	Naberezhnye Chelny	0.466101	9	0.466	2.40885	-6.33777	0.00176824	2.64333	-5.707	0.00332263
Сумгаит	Sumqayit	0.543394	10	0.543	2.95262	-6.23435	0.0019609	3.19419	-5.66128	0.00347806
Баку	Baku	5.27401	38	5.274	60.8649	-6.09101	0.00226312	53.2733	-3.34738	0.0351764
Курск	Kursk	1.19601	19	1.196	8.44602	-6.0255	0.00241634	8.48882	-5.9689	0.00255705
Дзержинск	Dzerzhinsk	1.00424	0	1.004	6.69112	-5.99797	0.00248379	6.83559	-6.14245	0.00214965
Чита	Chita	0.991932	0	0.992	6.58489	-5.89174	0.00276217	6.73461	-6.04146	0.00237808
Джезказган	Zhezqazghan	0.418203	8	0.418	2.08436	-5.86477	0.00283768	2.31055	-5.23589	0.00532209
Ростов-на-Дону	Rostov-on-Don	3.23283	16	3.233	31.7308	-5.74307	0.00320491	29.069	-4.40451	0.0122221
Электросталь	Elektrostal	0.501635	9	0.502	2.65965	-5.66587	0.00346213	2.89838	-5.10052	0.00609358
Ижевск/Устинов	Izhevsk	1.73579	4	1.736	13.8687	-5.52722	0.00397703	13.4632	-5.23066	0.00534999
Новосибирск	Novosibirsk	4.75082	33	4.751	52.9662	-5.41906	0.00443131	46.8132	-3.15033	0.042838
Днепродзержинск	Kamianske	0.975606	15	0.976	6.4439	-5.21006	0.00546135	6.60041	-4.9918	0.00679343
Свердловск	Yekaterinburg	4.28609	28	4.286	46.1805	-5.19996	0.00551679	41.2095	-3.25794	0.0384676
Ташкент	Tashkent	5.63499	45	5.635	66.472	-4.99384	0.00677958	57.8232	-2.33624	0.0966905
Макеевка	Makiivka	1.94069	6	1.941	16.09	-4.8858	0.00755308	15.458	-4.47494	0.0113909
Херсон	Kherson	1.07413	1	1.074	7.31911	-4.50741	0.011027	7.43033	-4.60534	0.0099983
Джамбул	Taraz	0.774531	0	0.775	4.74079	-4.04764	0.0174635	4.96142	-4.26827	0.014006
Кременчуг	Kremenchuk	0.609038	9	0.609	3.43965	-4.02914	0.0177896	3.6815	-3.62619	0.0266174
Стаханов/Кадиевка	Kadiivka	0.771286	0	0.771	4.70825	-4.0151	0.0180412	4.92974	-4.23659	0.0144568
Кировоград	Kropyvnytskyi	0.769808	0	0.77	4.70012	-4.00698	0.0181882	4.92183	-4.22868	0.0145716
Златоуст	Zlatoust	0.757953	0	0.758	4.60288	-3.90973	0.0200459	4.82706	-4.13391	0.0160201
Самарканд	Samarkand	1.35678	3	1.357	9.99209	-3.87318	0.0207921	9.92522	-3.82429	0.0218339
Абакан	Abakan	0.377543	6	0.378	1.82318	-3.81728	0.0219875	2.04005	-3.3213	0.0361059
Люберцы	Lyubertsy	0.544031	8	0.544	2.95986	-3.81125	0.0221205	3.20147	-3.38903	0.0337414
Прокопьевск	Prokopyevsk	1.16711	2	1.167	8.17454	-3.72986	0.0239962	8.23478	-3.77717	0.0228874
Наманган	Namangan	0.727422	0	0.727	4.35404	-3.66089	0.0257096	4.5839	-3.89075	0.02043
Семипалатинск	Semey	0.957394	1	0.957	6.27747	-3.59954	0.0273363	6.44173	-3.74148	0.023719
Магадан	Magadan	0.394077	6	0.394	1.92661	-3.5714	0.0281165	2.14747	-3.10141	0.0449857
Стерлитамак	Sterlitamak	0.713031	0	0.713	4.24279	-3.54965	0.0287347	4.47488	-3.78173	0.0227832
Клин	Klin	0.312999	5	0.313	1.41826	-3.50747	0.0299726	1.61512	-3.0149	0.0490507
Тамбов	Tambov	0.935199	1	0.935	6.08613	-3.43484	0.0322306	6.25893	-3.58355	0.0277769
Шахты	Shakhty	0.926264	1	0.926	6.00828	-3.36804	0.0344571	6.18444	-3.51938	0.0296178
Новочеркасск	Novocherkassk	0.684682	0	0.685	4.02248	-3.32933	0.0358171	4.25838	-3.56524	0.0282902
Павлодар	Pavlodar	0.773482	10	0.773	4.72451	-3.08342	0.0458023	4.94557	-2.81685	0.059794
Коркино	Korkino	0.341238	5	0.341	1.58958	-3.07424	0.0462247	1.79583	-2.62816	0.0722112
Саратов	Saratov	3.06503	19	3.065	29.5553	-2.94927	0.0523779	27.2109	-2.05949	0.127519
Могилев	Mogilev	0.842911	1	0.843	5.30233	-2.76827	0.0627705	5.50577	-2.93993	0.0528694
Находка	Nakhodka	0.456417	6	0.456	2.34029	-2.74283	0.0643879	2.5733	-2.36238	0.0941958
Белово	Belovo	0.608176	0	0.608	3.43214	-2.73899	0.0646356	3.67402	-2.98088	0.0507482
Харьков	Kharkiv	5.01365	43	5.014	56.9041	-2.70255	0.0670344	50.0417	-1.03122	0.356572
Улан-Удэ	Ulan-Ude	1.01626	2	1.016	6.79778	-2.67379	0.0689903	6.93687	-2.77808	0.0621577
Уральск	Oral	0.594361	0	0.594	3.32735	-2.6342	0.0717764	3.56959	-2.87644	0.056335
Усть-Каменогорск	Oskemen	0.906518	11	0.907	5.84475	-2.61631	0.073072	6.02776	-2.43548	0.0875557
Гомель	Gomel	1.16904	3	1.169	8.19319	-2.59905	0.0743442	8.25225	-2.63938	0.0714055
Петропавловск-Камчатский	Petropavlovsk-Kamchatsky	0.649072	8	0.649	3.74358	-2.59535	0.0746198	3.98312	-2.29989	0.10027
Армавир	Armavir	0.58311	0	0.583	3.24559	-2.55244	0.0778914	3.48795	-2.7948	0.0611271
Новокуйбышевск	Novokuybyshevsk	0.381852	5	0.382	1.8489	-2.52452	0.0800968	2.06681	-2.13908	0.117763
Архангельск	Arkhangelsk	1.44449	5	1.444	10.8537	-2.50266	0.0818669	10.7188	-2.42298	0.088657
Северодвинск	Severodvinsk	0.575908	0	0.576	3.19383	-2.50068	0.0820292	3.43618	-2.74304	0.0643744
Махачкала	Makhachkala	0.804242	1	0.804	4.97836	-2.49706	0.0823267	5.19223	-2.67579	0.0688524
Пятигорск	Pyatigorsk	0.487215	6	0.487	2.5544	-2.39132	0.0915088	2.79156	-2.04985	0.128754
Благовещенск	Blagoveshchensk	0.546168	0	0.546	2.97435	-2.2812	0.102162	3.21604	-2.5229	0.0802266
Мелитополь	Melitopol	0.544186	0	0.544	2.95986	-2.26671	0.103653	3.20147	-2.50832	0.0814049
Черновцы	Chernivtsi	0.76216	1	0.762	4.63524	-2.21305	0.109367	4.85861	-2.39755	0.0909405
Воткинск	Votkinsk	0.311594	4	0.312	1.41223	-2.2052	0.110228	1.60874	-1.83231	0.160043
Уссурийск	Ussuriysk	0.530024	0	0.53	2.8589	-2.16576	0.114663	3.0998	-2.40665	0.0901167
Иваново	Ivanovo	1.70448	20	1.704	13.5294	-2.13925	0.117743	13.1567	-2.36272	0.0941637
Запорожье	Zaporizhzhia	2.59401	16	2.594	23.6695	-2.05735	0.127792	22.1335	-1.49811	0.223552
Батуми	Batumi	0.426348	5	0.426	2.13763	-2.02612	0.131846	2.36541	-1.69739	0.183161
Ковров	Kovrov	0.509066	0	0.509	2.70913	-2.01598	0.13319	2.94849	-2.25534	0.104838
Новгород	Veliky Novgorod	0.524738	6	0.525	2.82306	-2.00783	0.13428	3.06364	-1.70959	0.18094
Краснодар	Krasnodar	2.07133	11	2.071	17.54	-2.0066	0.134445	16.7496	-1.67162	0.187942
Белгород	Belgorod	0.629073	7	0.629	3.59082	-1.93079	0.145034	3.83174	-1.6725	0.187777
Енакиево	Yenakijeve	0.717259	1	0.717	4.2745	-1.91847	0.146831	4.50598	-2.107	0.121602
Рыбинск/Андропов	Rybinsk	0.894459	2	0.894	5.73352	-1.89751	0.149942	5.921	-2.03122	0.131175
Ленинск-Кузнецкий	Leninsk-Kuznetsky	0.713479	1	0.713	4.24279	-1.89279	0.150651	4.47488	-2.08156	0.124735
Петропавловск	Petropavl	0.710986	1	0.711	4.22696	-1.87998	0.152593	4.45935	-2.06887	0.126328
Черемхово	Cheremkhovo	0.485632	0	0.486	2.54742	-1.85428	0.156566	2.78447	-2.09132	0.123524
Сызрань	Syzran	0.702934	1	0.703	4.16378	-1.82896	0.16058	4.39732	-2.01827	0.132885
Новошахтинск	Novoshakhtinsk	0.477744	0	0.478	2.49176	-1.79861	0.165529	2.72785	-2.0347	0.13072
Каменск-Уральский	Kamensk-Uralsky	0.696868	1	0.697	4.11654	-1.79092	0.166807	4.35092	-1.9805	0.138
Хмельницкий	Khmelnytskyi	0.473997	0	0.474	2.46405	-1.7709	0.17018	2.69962	-2.00647	0.134462
Чистяково/Торез	Chystiakove	0.473421	0	0.473	2.45713	-1.76398	0.171361	2.69257	-1.99942	0.135414
Кзыл-Орда	Kyzylorda	0.472519	0	0.473	2.45713	-1.76398	0.171361	2.69257	-1.99942	0.135414
Челябинск	Chelyabinsk	3.65653	49	3.657	37.3866	-1.7048	0.181809	33.8593	-2.93425	0.0531706
Витебск	Vitebsk	0.937555	10	0.938	6.11214	-1.69435	0.183719	6.2838	-1.56214	0.209687
Белая Церковь	Bila Tserkva	0.454884	0	0.455	2.33346	-1.64032	0.193918	2.56631	-1.87317	0.153636
Камышин	Kamyshin	0.366196	4	0.366	1.74655	-1.60669	0.20055	1.96019	-1.30368	0.271531
Осинники	Osinniki	0.446044	0	0.446	2.27223	-1.57908	0.206165	2.50363	-1.81048	0.163576
Ленинакан	Gyumri	0.663374	1	0.663	3.85145	-1.57902	0.206177	4.08974	-1.76937	0.17044
Ногинск	Noginsk	0.444962	0	0.445	2.26545	-1.57231	0.207565	2.49668	-1.80353	0.164716
Львов	Lviv	2.3463	27	2.346	20.7063	-1.56334	0.209435	19.5447	-2.06636	0.126646
Владивосток	Vladivostok	1.80706	20	1.807	14.6287	-1.55959	0.210222	14.1481	-1.7992	0.165431
Мичуринск	Michurinsk	0.441724	0	0.442	2.24515	-1.552	0.211824	2.47586	-1.78272	0.16818
Томск	Tomsk	1.39892	6	1.399	10.4058	-1.54592	0.213116	10.3069	-1.49656	0.223899
Ульяновск	Ulyanovsk	1.40297	15	1.403	10.4454	-1.52573	0.217462	10.3433	-1.58405	0.205143
Воркута	Vorkuta	0.778287	8	0.778	4.76523	-1.51388	0.220055	4.9852	-1.33309	0.263661
Орджоникидзе/Дзауджикау	Vladikavkaz	0.96631	10	0.966	6.35617	-1.50853	0.221235	6.5168	-1.39382	0.248126
Фрунзе	Bishkek	1.62892	8	1.629	12.7427	-1.49503	0.224242	12.4437	-1.3622	0.256097
Горький	Nizhny Novgorod	4.84021	45	4.84	54.2909	-1.47639	0.228461	47.9011	-0.443403	0.641848
Константиновка	Kostyantynivka	0.429505	0	0.43	2.16438	-1.47124	0.229641	2.39293	-1.69978	0.182724
Красноармейск Донец	Pokrovsk	0.428796	0	0.429	2.15769	-1.46454	0.231184	2.38604	-1.6929	0.183985
Черкассы	Cherkasy	0.644053	1	0.644	3.70524	-1.46342	0.231443	3.94517	-1.65361	0.191358
Салават	Salavat	0.428496	0	0.428	2.15099	-1.45785	0.232736	2.37916	-1.68601	0.185257
Муром	Murom	0.425637	0	0.426	2.13763	-1.44448	0.235869	2.36541	-1.67226	0.187822
Ворошиловград/Луганск	Luhansk	1.61074	8	1.611	12.5556	-1.41154	0.243768	12.2737	-1.28811	0.275792
Чирчик	Circhik	0.420279	0	0.42	2.09765	-1.4045	0.24549	2.32424	-1.63109	0.195716
Одесса	Odesa	3.67364	48	3.674	37.6181	-1.39625	0.247523	34.0542	-2.51035	0.0812398
Кировакан	Vanadzor	0.411661	0	0.412	2.04463	-1.35149	0.258854	2.26956	-1.57642	0.206714
Балаково	Balakovo	0.393629	4	0.394	1.92661	-1.34799	0.259762	2.14747	-1.07635	0.340837
Кизел	Kizel	0.408424	0	0.408	2.01826	-1.32511	0.265774	2.24232	-1.54917	0.212424
Бельцы	Balti	0.406094	0	0.406	2.0051	-1.31195	0.269294	2.22872	-1.53558	0.215331
Елец	Elets	0.405419	0	0.405	1.99853	-1.30538	0.27107	2.22193	-1.52878	0.2168
Узловая	Uzlovaya	0.403009	0	0.403	1.9854	-1.29225	0.274652	2.20836	-1.51521	0.219762
Целиноград/Акмолинск	Astana	0.713046	7	0.713	4.24279	-1.29118	0.274946	4.47488	-1.10416	0.331489
Красный Луч	Khrustalnyi	0.613167	1	0.613	3.46976	-1.27928	0.278238	3.71146	-1.46831	0.230314
Луцк	Lutsk	0.401335	0	0.401	1.9723	-1.27915	0.278274	2.1948	-1.50165	0.222762
Артем	Artyom	0.400287	0	0.4	1.96575	-1.27261	0.2801	2.18802	-1.49488	0.224276
Кинешма	Kineshma	0.399922	0	0.4	1.96575	-1.27261	0.2801	2.18802	-1.49488	0.224276
Харцызск	Khartsyzk	0.399887	0	0.4	1.96575	-1.27261	0.2801	2.18802	-1.49488	0.224276
Брест	Brest	0.510666	5	0.511	2.72331	-1.26883	0.28116	2.96284	-1.02984	0.357064
Бердянск	Berdyansk	0.39754	0	0.398	1.95268	-1.25954	0.283785	2.17449	-1.48134	0.227333
Краматорск	Kramatorsk	0.781562	2	0.782	4.79787	-1.25357	0.285484	5.01695	-1.40054	0.246464
Канск	Kansk	0.390406	0	0.39	1.90062	-1.20747	0.298953	2.12052	-1.42737	0.239939
Свердловск (Луганск обл)	Dovzhansk	0.390215	0	0.39	1.90062	-1.20747	0.298953	2.12052	-1.42737	0.239939
Бийск	Biysk	0.771804	2	0.772	4.71638	-1.19956	0.301327	4.93765	-1.34706	0.260004
Киев	Kyiv	6.73984	95	6.74	84.3618	-1.1903	0.30413	72.1709	-3.67071	0.0254584
Загорск	Sergiyev Posad	0.381177	0	0.381	1.84246	-1.14931	0.316855	2.06011	-1.36696	0.254881
Бобруйск	Babruysk	0.589801	1	0.59	3.29756	-1.14637	0.317788	3.53986	-1.33382	0.263469
Андижан	Andijan	0.760653	2	0.761	4.62714	-1.14085	0.319547	4.85072	-1.28879	0.275604
Куйбышев	Samara	4.29067	39	4.291	46.2523	-1.1378	0.320523	41.269	-0.339796	0.711916
Лиепая	Liepaja	0.379091	0	0.379	1.8296	-1.13645	0.320956	2.04673	-1.35359	0.258311
Орск	Orsk	0.908779	3	0.909	5.86191	-1.115	0.327915	6.04421	-1.22212	0.294605
Серов	Serov	0.424147	4	0.424	2.12428	-1.1028	0.33194	2.35167	-0.861622	0.422476
Симферополь	Simferopol	1.04587	4	1.046	7.06624	-1.09641	0.334068	7.19129	-1.16318	0.312491
Первомайск (Луганск обл)	Pervomaisk	0.372038	0	0.372	1.78476	-1.09161	0.335676	2.00004	-1.3069	0.270658
Рубцовск	Rubtsovsk	0.577424	1	0.577	3.20121	-1.07269	0.342087	3.44357	-1.25896	0.283949
Новомосковск/Сталиногорск	Novomoskovsk	0.543517	5	0.544	2.95986	-1.03262	0.356073	3.20147	-0.822577	0.439298
Чапаевск	Chapayevsk	0.359245	0	0.359	1.70223	-1.00908	0.364554	1.91389	-1.22074	0.295012
Калинин	Tver	1.4204	14	1.42	10.6142	-0.998019	0.368609	10.4987	-1.05244	0.349085
Славянск	Slovyansk	0.562066	1	0.562	3.09092	-0.989003	0.371947	3.3331	-1.17367	0.30923
Душанбе/Сталинабад	Dushanbe	1.51076	15	1.511	11.5291	-0.982766	0.374274	11.3378	-1.06921	0.34328
Борисов	Barysaw	0.35253	0	0.353	1.66447	-0.971319	0.378583	1.87438	-1.18123	0.306901
Рудный	Rudny	0.351107	0	0.351	1.65193	-0.958778	0.383361	1.86124	-1.16809	0.31096
Киселевск	Kiselevsk	0.55385	1	0.554	3.0325	-0.944963	0.388694	3.27447	-1.12867	0.323463
Белорецк	Beloretsk	0.345717	0	0.346	1.62068	-0.927532	0.395529	1.82848	-1.13533	0.321316
Мурманск	Murmansk	1.26412	6	1.264	9.09113	-0.923286	0.397212	9.09023	-0.922887	0.39737
Феодосия	Feodosia	0.343605	0	0.344	1.60822	-0.915074	0.400487	1.8154	-1.12226	0.325543
Гродно	Grodno	0.546837	1	0.547	2.9816	-0.906771	0.403826	3.22334	-1.08956	0.336364
Гуково	Gukovo	0.341924	0	0.342	1.59579	-0.902641	0.405497	1.80235	-1.1092	0.329823
Коканд	Kokand	0.545631	1	0.546	2.97435	-0.901341	0.406025	3.21604	-1.084	0.33824
Великие Луки	Velikiye Luki	0.340782	0	0.341	1.58958	-0.896434	0.408022	1.79583	-1.10268	0.33198
Клайпеда	Klaipeda	0.564528	5	0.565	3.1129	-0.896238	0.408102	3.35514	-0.703131	0.495033
Щелково	Shchyolkovo	0.334549	3	0.335	1.55246	-0.894368	0.408866	1.7568	-0.662271	0.515679
Новотроицк	Novotroitsk	0.338802	0	0.339	1.57718	-0.884037	0.413112	1.7828	-1.08965	0.336334
Батайск	Bataysk	0.336267	0	0.336	1.55863	-0.865487	0.420847	1.76329	-1.07014	0.34296
Александров	Aleksandrov	0.336036	0	0.336	1.55863	-0.865487	0.420847	1.76329	-1.07014	0.34296
Балашов	Balashov	0.335692	0	0.336	1.55863	-0.865487	0.420847	1.76329	-1.07014	0.34296
Иркутск	Irkutsk	1.90514	12	1.905	15.694	-0.848008	0.428267	15.1039	-0.657435	0.518179
Губаха	Gubakha	0.332399	0	0.332	1.53399	-0.840838	0.431349	1.73734	-1.0442	0.351973
Лениногорск	Ridder	0.331696	0	0.332	1.53399	-0.840838	0.431349	1.73734	-1.0442	0.351973
Житомир	Zhytomyr	0.700497	2	0.7	4.14014	-0.82883	0.43656	4.37411	-0.976884	0.376482
Усолье-Сибирское	Usolye-Sibirskoye	0.328078	0	0.328	1.50944	-0.816288	0.44207	1.71147	-1.01832	0.361201
Александрия	Oleksandriia	0.327601	0	0.328	1.50944	-0.816288	0.44207	1.71147	-1.01832	0.361201
Подольск	Podolsk	0.695864	2	0.696	4.10868	-0.809199	0.445215	4.34319	-0.957117	0.383998
Псков	Pskov	0.527955	1	0.528	2.84455	-0.804749	0.4472	3.08533	-0.984777	0.373523
Липецк	Lipetsk	1.23288	6	1.233	8.79557	-0.79389	0.452083	8.81508	-0.802302	0.448296
Грозный	Grozny	1.34976	7	1.35	9.92354	-0.788835	0.454374	9.86189	-0.763912	0.46584
Южно-Сахалинск	Yuzhno-Sakhalinsk	0.470469	4	0.47	2.43641	-0.781231	0.457842	2.67145	-0.581166	0.559246
Октябрьский	Oktyabrsky	0.321522	0	0.322	1.4728	-0.779648	0.458567	1.6728	-0.979654	0.375441
Дзержинск (Донецк обла)	Toretsk	0.320584	0	0.321	1.46671	-0.773564	0.461366	1.66637	-0.973226	0.377862
Павлоград	Pavlohrad	0.320211	0	0.32	1.46063	-0.767485	0.464179	1.65995	-0.966803	0.380297
Лысьва	Lysva	0.319267	0	0.319	1.45456	-0.761413	0.467006	1.65353	-0.960384	0.382746
Кувша	Kuvsha	0.318774	0	0.319	1.45456	-0.761413	0.467006	1.65353	-0.960384	0.382746
Кутаиси	Kutaisi	0.676242	2	0.676	3.95229	-0.712624	0.490356	4.18924	-0.8596	0.423331
Зеленодольск	Zelenodolsk	0.310133	0	0.31	1.4002	-0.707048	0.493098	1.59598	-0.902833	0.405419
Тула	Tula	2.00426	20	2.004	16.7888	-0.706371	0.493432	16.0815	-0.949392	0.386976
Кунгур	Kungur	0.308078	0	0.308	1.38818	-0.695037	0.499056	1.58324	-0.890098	0.410616
Вольск	Volsk	0.305494	0	0.305	1.37022	-0.677069	0.508104	1.56418	-0.871031	0.41852
Шахтерск	Shakhtarsk	0.302575	0	0.303	1.35827	-0.665123	0.51421	1.55149	-0.858345	0.423863
Ургенч	Urgench	0.302074	0	0.302	1.35231	-0.65916	0.517286	1.54516	-0.852009	0.426557
Березники	Berezniki	0.60594	5	0.606	3.41712	-0.657763	0.518009	3.65907	-0.494651	0.609784
Балашиха	Balashikha	0.369206	3	0.369	1.76563	-0.653184	0.520386	1.9801	-0.452755	0.635874
Бугульма	Bugulma	0.299578	0	0.3	1.3404	-0.647253	0.523482	1.5325	-0.839353	0.43199
Ашхабад	Ashgabat	1.0312	9	1.031	6.93168	-0.646087	0.524093	7.06386	-0.582423	0.558543
Кривой Рог	Kryvyi Rih	2.42574	25	2.426	21.6513	-0.643182	0.525617	20.373	-1.03098	0.356657
Ставрополь	Stavropol	0.826928	7	0.827	5.16881	-0.642861	0.525786	5.37671	-0.528611	0.589423
Копейск	Kopeysk	0.656951	2	0.657	3.80513	-0.62336	0.53614	4.04398	-0.769037	0.463459
Ереван	Yerevan	3.17933	27	3.179	31.0274	-0.619124	0.538416	28.4692	-0.127989	0.879863
Кисловодск	Kislovodsk	0.376392	3	0.376	1.81035	-0.608249	0.544303	2.0267	-0.413851	0.661099
Никополь	Nikopol	0.490029	1	0.49	2.57537	-0.608152	0.544356	2.81286	-0.781336	0.457794
Бухара	Bukhara	0.499684	4	0.5	2.64556	-0.601685	0.547888	2.88409	-0.425199	0.65364
Ош	Osh	0.485194	1	0.485	2.54045	-0.583048	0.558194	2.77738	-0.755201	0.469916
Петрозаводск	Petrozavodsk	0.794396	3	0.794	4.89611	-0.580129	0.559826	5.11241	-0.694752	0.499198
Якутск	Yakutsk	0.504213	4	0.504	2.67377	-0.579345	0.560265	2.91268	-0.405825	0.666427
Балхаш	Balkhash	0.380852	3	0.381	1.84246	-0.577058	0.561548	2.06011	-0.386871	0.679179
Тернополь	Ternopil	0.382815	3	0.383	1.85534	-0.564788	0.568481	2.07351	-0.376263	0.686422
Омск	Omsk	3.38793	30	3.388	33.7716	-0.532701	0.587017	30.8038	-0.125535	0.882025
Анжеро-Судженск	Anzhero-Sudzhensk	0.47356	1	0.474	2.46405	-0.528462	0.589511	2.69962	-0.698241	0.49746
Киров	Kirov	1.38763	8	1.388	10.2971	-0.509551	0.600765	10.2066	-0.477909	0.620079
Кустанай	Kostanay	0.517435	4	0.517	2.76595	-0.509171	0.600994	3.00596	-0.34502	0.708206
Саранск	Saransk	0.775272	3	0.775	4.74079	-0.499848	0.606623	4.96142	-0.614396	0.540968
Серпухов	Serpukhov	0.518917	4	0.519	2.7802	-0.498697	0.607321	3.02036	-0.33595	0.714659
Йошкар-Ола	Yoshkar-Ola	0.626785	2	0.627	3.57563	-0.487482	0.614171	3.81666	-0.630301	0.532432
Нальчик	Nalchik	0.624015	2	0.624	3.55287	-0.474242	0.622357	3.79407	-0.616722	0.539711
Энгельс	Engels	0.62025	2	0.62	3.52259	-0.456689	0.633377	3.76399	-0.598701	0.549525
Артемовск	Bakhmut	0.457868	1	0.458	2.35396	-0.450674	0.637199	2.58728	-0.616736	0.539703
Полтава	Poltava	0.88638	4	0.886	5.66533	-0.408438	0.664688	5.85548	-0.494735	0.609732
Гурьев	Atyrau	0.448828	1	0.449	2.2926	-0.407773	0.66513	2.52449	-0.571608	0.564617
Актюбинск	Aktobe	0.603431	2	0.603	3.39462	-0.383375	0.681557	3.63666	-0.523206	0.592618
Сыктывкар	Syktyvkar	0.543435	4	0.543	2.95262	-0.379348	0.684307	3.19419	-0.232725	0.792371
Чимкент	Shymkent	0.994254	8	0.994	6.60256	-0.378934	0.684591	6.75142	-0.316624	0.728605
Калининград МО	Korolyov	0.432433	1	0.432	2.17779	-0.328458	0.720033	2.40672	-0.48782	0.613963
Ленинабад	Khujand	0.431778	1	0.432	2.17779	-0.328458	0.720033	2.40672	-0.48782	0.613963
Алма- Ата	Almaty	2.89904	25	2.899	27.4441	-0.312789	0.731404	25.3986	0.0416298	1.04251
Хабаровск	Khabarovsk	1.78771	16	1.788	14.4243	-0.292602	0.746319	13.9642	-0.424335	0.654205
Первоуральск	Pervouralsk	0.574625	2	0.575	3.18645	-0.267254	0.765479	3.4288	-0.402817	0.668434
Каунас	Kaunas	1.23402	10	1.234	8.80507	-0.256373	0.773853	8.82393	-0.249984	0.778813
Астрахань	Astrakhan	1.62448	14	1.624	12.6906	-0.240834	0.785972	12.3965	-0.325955	0.721838
Ангарск	Angarsk	0.813186	6	0.813	5.05267	-0.240086	0.78656	5.26427	-0.150112	0.860612
Курган	Kurgan	0.962959	5	0.963	6.32991	-0.23764	0.788486	6.49176	-0.300458	0.740479
Воронеж	Voronezh	2.70243	23	2.702	24.9901	-0.236664	0.789256	23.2798	0.0619847	1.06395
Миасс	Miass	0.567141	2	0.567	3.12758	-0.235157	0.790447	3.36985	-0.369349	0.691184
Тирасполь	Tiraspol	0.446761	3	0.447	2.27901	-0.22718	0.796777	2.51058	-0.0857808	0.917795
Тбилиси	Tbilisi	3.71208	38	3.712	38.1369	-0.210549	0.810139	34.4907	-0.282573	0.753842
Смоленск	Smolensk	0.954024	5	0.954	6.25129	-0.207749	0.812411	6.41675	-0.27113	0.762517
Брянск	Bryansk	1.35022	11	1.35	9.92354	-0.204823	0.814792	9.86189	-0.223928	0.799373
Орел	Oryol	0.949966	5	0.95	6.21643	-0.194626	0.823142	6.38346	-0.258234	0.772414
Тюмень	Tyumen	1.06663	6	1.067	7.25568	-0.192737	0.824699	7.37043	-0.232953	0.792191
Невинномысск	Nevinnomyssk	0.312748	2	0.313	1.41826	-0.187645	0.828909	1.61512	-0.0409478	0.959879
Орша	Orsha	0.399015	1	0.399	1.95922	-0.181144	0.834315	2.18126	-0.330832	0.718326
Барановичи	Baranavichy	0.398777	1	0.399	1.95922	-0.181144	0.834315	2.18126	-0.330832	0.718326
Чарджоу	Turkmenabat	0.459308	3	0.459	2.36081	-0.174308	0.840038	2.59427	-0.040549	0.960262
Оренбург/Чкалов	Orenburg	1.4924	10	1.492	11.3365	-0.173436	0.840771	11.1616	-0.12613	0.8815
Фергана	Fergana	0.548626	2	0.549	2.99612	-0.164734	0.848119	3.23793	-0.295597	0.744087
Евпатория	Yevpatoriya	0.319165	2	0.319	1.45456	-0.158169	0.853705	1.65353	-0.0157514	0.984372
Даугавпилс	Daugavpils	0.390175	1	0.39	1.90062	-0.142545	0.867149	2.12052	-0.289371	0.748734
Кострома	Kostroma	0.933303	5	0.933	6.06881	-0.139971	0.869383	6.24236	-0.20438	0.815153
Калуга	Kaluga	0.842167	6	0.842	5.29396	-0.138168	0.870952	5.49769	-0.0604191	0.94137
Ухта	Ukhta	0.324138	2	0.324	1.48498	-0.134363	0.874273	1.68567	0.00457284	1.00458
Сумы	Sumy	0.676216	3	0.676	3.95229	-0.121385	0.885693	4.18924	-0.229666	0.794799
Соликамск	Solikamsk	0.383116	1	0.383	1.85534	-0.113005	0.893146	2.07351	-0.25754	0.772951
Ярославль	Yaroslavl	2.12201	19	2.122	18.1173	-0.108188	0.897459	17.2616	-0.303807	0.738003
Асбест	Asbest	0.380055	1	0.38	1.83603	-0.100476	0.904407	2.05342	-0.244011	0.783479
Ачинск	Achinsk	0.379448	1	0.379	1.8296	-0.0963166	0.908176	2.04673	-0.239517	0.787008
Сарапул	Sarapul	0.379159	1	0.379	1.8296	-0.0963166	0.908176	2.04673	-0.239517	0.787008
Коммунарск/Ворошиловск	Alchevsk	0.529101	2	0.529	2.85173	-0.0894539	0.91443	3.09256	-0.216228	0.805552
Чернигов	Chernihiv	0.665541	3	0.666	3.87466	-0.0870134	0.916665	4.11266	-0.194131	0.82355
Николаев	Mykolaiv	1.39213	11	1.392	10.3366	-0.0855782	0.917981	10.2431	-0.111289	0.89468
Алмалык	Almalyk	0.335713	2	0.336	1.55863	-0.0799014	0.923207	1.76329	0.0509809	1.0523
Таганрог	Taganrog	1.02461	6	1.025	6.87804	-0.0660614	0.936073	7.01301	-0.110319	0.895548
Альметьевск	Almetyevsk	0.340795	2	0.341	1.58958	-0.0582717	0.943394	1.79583	0.0693769	1.07184
Кировабад	Ganja	0.778662	4	0.779	4.77339	-0.0385039	0.962228	4.99313	-0.123979	0.883398
Рязань	Ryazan	1.41416	11	1.414	10.5546	-0.0284013	0.971998	10.4438	-0.0569742	0.944618
Ревда	Revda	0.348812	2	0.349	1.63941	-0.0248981	0.975409	1.84812	0.0977205	1.10265
Троицк	Troitsk	0.350981	2	0.351	1.65193	-0.0167847	0.983355	1.86124	0.104603	1.11027
Орехово-Зуево	Orekhovo-Zuyevo	0.506797	2	0.507	2.69497	-0.0103382	0.989715	2.93416	-0.132155	0.876205
Темиртау	Temirtau	0.638845	4	0.639	3.667	-0.00212666	0.997876	3.90729	0.0920509	1.09642
Винница	Vinnytsia	0.886194	6	0.886	5.66533	-0.00162955	0.998372	5.85548	0.0598473	1.06167
Тольятти/Ставрополь-на-Волге	Tolyatti	1.12001	8	1.12	7.73929	0.019988	1.02019	7.82624	0.0440808	1.04507
Пенза	Penza	1.53727	12	1.537	11.7939	0.0288527	1.02927	11.5797	-0.0210197	0.9792
Химки	Khimki	0.345829	1	0.346	1.62068	0.0359018	1.03655	1.82848	-0.0955912	0.908835
Жданов/Мариуполь	Mariupol	1.73709	14	1.737	13.8793	0.0444094	1.04541	13.4728	-0.0433381	0.957588
Шяуляй	Siauliai	0.374009	2	0.374	1.79754	0.0703306	1.07286	2.01336	0.178312	1.1952
Вологда	Vologda	0.791935	5	0.792	4.8797	0.0735312	1.0763	5.09648	0.141967	1.15254
Нукус	Nukus	0.33642	1	0.336	1.55863	0.0739868	1.07679	1.76329	-0.0537203	0.947697
Ровно	Rivne	0.482069	2	0.482	2.51955	0.0747495	1.07761	2.75613	-0.0408712	0.959953
Каменск-Шахтинский	Kamensk-Shakhtinsky	0.335227	1	0.335	1.55246	0.0777432	1.08085	1.7568	-0.0495794	0.95163
Чебоксары	Cheboksary	0.916844	6	0.917	5.93068	0.082727	1.08625	6.11013	0.134257	1.14369
Калининград	Kaliningrad	1.18569	8	1.186	8.35216	0.0834488	1.08703	8.40105	0.0709209	1.0735
Керчь	Kerch	0.53309	3	0.533	2.88046	0.0944062	1.09901	3.12153	0.188104	1.20696
Кокчетав	Kokshetau	0.329011	1	0.329	1.51556	0.10008	1.10526	1.71793	-0.0249128	0.975395
Ангрен	Angren	0.328767	1	0.329	1.51556	0.10008	1.10526	1.71793	-0.0249128	0.975395
Димитровград/Мелекесс	Dimitrovgrad	0.327867	1	0.328	1.50944	0.10377	1.10935	1.71147	-0.0208317	0.979384
Краснодон	Sorokyne	0.384303	2	0.384	1.8618	0.104893	1.11059	2.08021	0.207452	1.23054
Кузнецк	Kuznetsk	0.325869	1	0.326	1.4972	0.111119	1.11753	1.69856	-0.0126954	0.987385
Комсомольск-на-Амуре	Komsomolsk-on-Amur	0.935398	6	0.935	6.08613	0.127608	1.13611	6.25893	0.121842	1.12958
Междуреченск	Mezhdurechinsk	0.315848	1	0.316	1.43638	0.14728	1.15868	1.6343	0.027462	1.02784
Небит-Даг	Balkanabat	0.311741	1	0.312	1.41223	0.161468	1.17523	1.60874	0.0432772	1.04423
Котлас	Kotlas	0.403795	2	0.404	1.99196	0.168584	1.18363	2.21514	0.212943	1.23731
Майкоп	Maykop	0.445667	2	0.446	2.27223	0.187998	1.20683	2.50363	0.082285	1.08577
Маргилан	Margilan	0.412156	2	0.412	2.04463	0.192174	1.21188	2.26956	0.189174	1.20825
Ивано-Франковск/Станислав	Ivano-Frankivsk	0.44129	2	0.441	2.23839	0.202841	1.22488	2.46893	0.0985899	1.10361
Лисичанск	Lysychansk	0.438921	2	0.439	2.22489	0.208717	1.2321	2.45508	0.105056	1.11077

## Sheet: Geo_variables
Contemp name	English name	Population	mentions	NW	Mos	Mos_Bord	Cent	Est	Volga	LM_Volga	L_Vol	Rost	South	Donb	Kalining	Belor	Dnipr	Crimea	C_Ukr	Mold	Georg	Azer	NKaz	SKaz	WKaz	EUral	WUral	Turkm	WSib	ESib	East	Uzb	NCau	NE	S_Ukr	W_Ukr	Slobo	Tajik	Kyrgyz	Arm	Latv	Lith	Chernoz
Ленинград	St Petersburg	15.9477	339	1	0	0	0	0	0	0	0	0	0	0	0	0	0	0	0	0	0	0	0	0	0	0	0	0	0	0	0	0	0	0	0	0	0	0	0	0	0	0	0
Киев	Kyiv	6.73984	95	0	0	0	0	0	0	0	0	0	0	0	0	0	0	0	1	0	0	0	0	0	0	0	0	0	0	0	0	0	0	0	0	0	0	0	0	0	0	0	0
Ташкент	Tashkent	5.63499	45	0	0	0	0	0	0	0	0	0	0	0	0	0	0	0	0	0	0	0	0	0	0	0	0	0	0	0	0	1	0	0	0	0	0	0	0	0	0	0	0
Баку	Baku	5.27401	38	0	0	0	0	0	0	0	0	0	0	0	0	0	0	0	0	0	0	1	0	0	0	0	0	0	0	0	0	0	0	0	0	0	0	0	0	0	0	0	0
Харьков	Kharkiv	5.01365	43	0	0	0	0	0	0	0	0	0	0	0	0	0	0	0	0	0	0	0	0	0	0	0	0	0	0	0	0	0	0	0	0	0	1	0	0	0	0	0	0
Горький	Nizhny Novgorod	4.84021	45	0	0	0	0	0	1	0	0	0	0	0	0	0	0	0	0	0	0	0	0	0	0	0	0	0	0	0	0	0	0	0	0	0	0	0	0	0	0	0	0
Новосибирск	Novosibirsk	4.75082	33	0	0	0	0	0	0	0	0	0	0	0	0	0	0	0	0	0	0	0	0	0	0	0	0	0	1	0	0	0	0	0	0	0	0	0	0	0	0	0	0
Куйбышев	Samara	4.29067	39	0	0	0	0	0	0	1	0	0	0	0	0	0	0	0	0	0	0	0	0	0	0	0	0	0	0	0	0	0	0	0	0	0	0	0	0	0	0	0	0
Свердловск	Yekaterinburg	4.28609	28	0	0	0	0	0	0	0	0	0	0	0	0	0	0	0	0	0	0	0	0	0	0	1	0	0	0	0	0	0	0	0	0	0	0	0	0	0	0	0	0
Днепропетровск	Dnipro	3.77353	16	0	0	0	0	0	0	0	0	0	0	0	0	0	1	0	0	0	0	0	0	0	0	0	0	0	0	0	0	0	0	0	0	0	0	0	0	0	0	0	0
Донецк/Сталино	Donetsk	3.73339	12	0	0	0	0	0	0	0	0	0	0	1	0	0	0	0	0	0	0	0	0	0	0	0	0	0	0	0	0	0	0	0	0	0	0	0	0	0	0	0	0
Тбилиси	Tbilisi	3.71208	38	0	0	0	0	0	0	0	0	0	0	0	0	0	0	0	0	0	1	0	0	0	0	0	0	0	0	0	0	0	0	0	0	0	0	0	0	0	0	0	0
Минск	Minsk	3.71072	72	0	0	0	0	0	0	0	0	0	0	0	0	1	0	0	0	0	0	0	0	0	0	0	0	0	0	0	0	0	0	0	0	0	0	0	0	0	0	0	0
Одесса	Odesa	3.67364	48	0	0	0	0	0	0	0	0	0	0	0	0	0	0	0	0	0	0	0	0	0	0	0	0	0	0	0	0	0	0	0	1	0	0	0	0	0	0	0	0
Челябинск	Chelyabinsk	3.65653	49	0	0	0	0	0	0	0	0	0	0	0	0	0	0	0	0	0	0	0	0	0	0	1	0	0	0	0	0	0	0	0	0	0	0	0	0	0	0	0	0
Казань	Kazan	3.49281	17	0	0	0	0	0	1	0	0	0	0	0	0	0	0	0	0	0	0	0	0	0	0	0	0	0	0	0	0	0	0	0	0	0	0	0	0	0	0	0	0
Пермь/Молотов	Perm	3.4688	8	0	0	0	0	0	0	0	0	0	0	0	0	0	0	0	0	0	0	0	0	0	0	0	1	0	0	0	0	0	0	0	0	0	0	0	0	0	0	0	0
Омск	Omsk	3.38793	30	0	0	0	0	0	0	0	0	0	0	0	0	0	0	0	0	0	0	0	0	0	0	0	0	0	1	0	0	0	0	0	0	0	0	0	0	0	0	0	0
Волгоград/Сталинград	Volgograd	3.28459	62	0	0	0	0	0	0	0	1	0	0	0	0	0	0	0	0	0	0	0	0	0	0	0	0	0	0	0	0	0	0	0	0	0	0	0	0	0	0	0	0
Ростов-на-Дону	Rostov-on-Don	3.23283	16	0	0	0	0	0	0	0	0	1	0	0	0	0	0	0	0	0	0	0	0	0	0	0	0	0	0	0	0	0	0	0	0	0	0	0	0	0	0	0	0
Ереван	Yerevan	3.17933	27	0	0	0	0	0	0	0	0	0	0	0	0	0	0	0	0	0	0	0	0	0	0	0	0	0	0	0	0	0	0	0	0	0	0	0	0	1	0	0	0
Уфа	Ufa	3.16881	5	0	0	0	0	0	0	0	0	0	0	0	0	0	0	0	0	0	0	0	0	0	0	0	1	0	0	0	0	0	0	0	0	0	0	0	0	0	0	0	0
Саратов	Saratov	3.06503	19	0	0	0	0	0	0	1	0	0	0	0	0	0	0	0	0	0	0	0	0	0	0	0	0	0	0	0	0	0	0	0	0	0	0	0	0	0	0	0	0
Рига	Riga	2.99828	73	0	0	0	0	0	0	0	0	0	0	0	0	0	0	0	0	0	0	0	0	0	0	0	0	0	0	0	0	0	0	0	0	0	0	0	0	0	1	0	0
Алма- Ата	Almaty	2.89904	25	0	0	0	0	0	0	0	0	0	0	0	0	0	0	0	0	0	0	0	0	1	0	0	0	0	0	0	0	0	0	0	0	0	0	0	0	0	0	0	0
Воронеж	Voronezh	2.70243	23	0	0	0	0	0	0	0	0	0	0	0	0	0	0	0	0	0	0	0	0	0	0	0	0	0	0	0	0	0	0	0	0	0	0	0	0	0	0	0	1
Запорожье	Zaporizhzhia	2.59401	16	0	0	0	0	0	0	0	0	0	0	0	0	0	1	0	0	0	0	0	0	0	0	0	0	0	0	0	0	0	0	0	0	0	0	0	0	0	0	0	0
Красноярск	Krasnoyarsk	2.59197	47	0	0	0	0	0	0	0	0	0	0	0	0	0	0	0	0	0	0	0	0	0	0	0	0	0	0	1	0	0	0	0	0	0	0	0	0	0	0	0	0
Кривой Рог	Kryvyi Rih	2.42574	25	0	0	0	0	0	0	0	0	0	0	0	0	0	1	0	0	0	0	0	0	0	0	0	0	0	0	0	0	0	0	0	0	0	0	0	0	0	0	0	0
Львов	Lviv	2.3463	27	0	0	0	0	0	0	0	0	0	0	0	0	0	0	0	0	0	0	0	0	0	0	0	0	0	0	0	0	0	0	0	0	1	0	0	0	0	0	0	0
Ярославль	Yaroslavl	2.12201	19	0	0	1	0	0	0	0	0	0	0	0	0	0	0	0	0	0	0	0	0	0	0	0	0	0	0	0	0	0	0	0	0	0	0	0	0	0	0	0	0
Караганда	Qaragandy	2.08277	41	0	0	0	0	0	0	0	0	0	0	0	0	0	0	0	0	0	0	0	1	0	0	0	0	0	0	0	0	0	0	0	0	0	0	0	0	0	0	0	0
Краснодар	Krasnodar	2.07133	11	0	0	0	0	0	0	0	0	0	1	0	0	0	0	0	0	0	0	0	0	0	0	0	0	0	0	0	0	0	0	0	0	0	0	0	0	0	0	0	0
Новокузнецк/Сталинск	Novokuznetsk	2.03914	5	0	0	0	0	0	0	0	0	0	0	0	0	0	0	0	0	0	0	0	0	0	0	0	0	0	1	0	0	0	0	0	0	0	0	0	0	0	0	0	0
Тула	Tula	2.00426	20	0	1	0	0	0	0	0	0	0	0	0	0	0	0	0	0	0	0	0	0	0	0	0	0	0	0	0	0	0	0	0	0	0	0	0	0	0	0	0	0
Макеевка	Makiivka	1.94069	6	0	0	0	0	0	0	0	0	0	0	1	0	0	0	0	0	0	0	0	0	0	0	0	0	0	0	0	0	0	0	0	0	0	0	0	0	0	0	0	0
Иркутск	Irkutsk	1.90514	12	0	0	0	0	0	0	0	0	0	0	0	0	0	0	0	0	0	0	0	0	0	0	0	0	0	0	1	0	0	0	0	0	0	0	0	0	0	0	0	0
Барнаул	Barnaul	1.8668	4	0	0	0	0	0	0	0	0	0	0	0	0	0	0	0	0	0	0	0	0	0	0	0	0	0	1	0	0	0	0	0	0	0	0	0	0	0	0	0	0
Владивосток	Vladivostok	1.80706	20	0	0	0	0	0	0	0	0	0	0	0	0	0	0	0	0	0	0	0	0	0	0	0	0	0	0	0	1	0	0	0	0	0	0	0	0	0	0	0	0
Хабаровск	Khabarovsk	1.78771	16	0	0	0	0	0	0	0	0	0	0	0	0	0	0	0	0	0	0	0	0	0	0	0	0	0	0	0	1	0	0	0	0	0	0	0	0	0	0	0	0
Кемерово	Kemerovo	1.75498	3	0	0	0	0	0	0	0	0	0	0	0	0	0	0	0	0	0	0	0	0	0	0	0	0	0	1	0	0	0	0	0	0	0	0	0	0	0	0	0	0
Жданов/Мариуполь	Mariupol	1.73709	14	0	0	0	0	0	0	0	0	0	0	1	0	0	0	0	0	0	0	0	0	0	0	0	0	0	0	0	0	0	0	0	0	0	0	0	0	0	0	0	0
Ижевск/Устинов	Izhevsk	1.73579	4	0	0	0	0	0	0	0	0	0	0	0	0	0	0	0	0	0	0	0	0	0	0	0	1	0	0	0	0	0	0	0	0	0	0	0	0	0	0	0	0
Иваново	Ivanovo	1.70448	20	0	0	1	0	0	0	0	0	0	0	0	0	0	0	0	0	0	0	0	0	0	0	0	0	0	0	0	0	0	0	0	0	0	0	0	0	0	0	0	0
Фрунзе	Bishkek	1.62892	8	0	0	0	0	0	0	0	0	0	0	0	0	0	0	0	0	0	0	0	0	0	0	0	0	0	0	0	0	0	0	0	0	0	0	0	1	0	0	0	0
Астрахань	Astrakhan	1.62448	14	0	0	0	0	0	0	0	1	0	0	0	0	0	0	0	0	0	0	0	0	0	0	0	0	0	0	0	0	0	0	0	0	0	0	0	0	0	0	0	0
Ворошиловград/Луганск	Luhansk	1.61074	8	0	0	0	0	0	0	0	0	0	0	1	0	0	0	0	0	0	0	0	0	0	0	0	0	0	0	0	0	0	0	0	0	0	0	0	0	0	0	0	0
Нижний Тагил	Nizhny Tagil	1.59769	28	0	0	0	0	0	0	0	0	0	0	0	0	0	0	0	0	0	0	0	0	0	0	1	0	0	0	0	0	0	0	0	0	0	0	0	0	0	0	0	0
Пенза	Penza	1.53727	12	0	0	0	0	0	0	1	0	0	0	0	0	0	0	0	0	0	0	0	0	0	0	0	0	0	0	0	0	0	0	0	0	0	0	0	0	0	0	0	0
Магнитогорск	Magnitogorsk	1.52808	25	0	0	0	0	0	0	0	0	0	0	0	0	0	0	0	0	0	0	0	0	0	0	1	0	0	0	0	0	0	0	0	0	0	0	0	0	0	0	0	0
Таллин	Tallinn	1.52271	44	0	0	0	0	1	0	0	0	0	0	0	0	0	0	0	0	0	0	0	0	0	0	0	0	0	0	0	0	0	0	0	0	0	0	0	0	0	0	0	0
Душанбе/Сталинабад	Dushanbe	1.51076	15	0	0	0	0	0	0	0	0	0	0	0	0	0	0	0	0	0	0	0	0	0	0	0	0	0	0	0	0	0	0	0	0	0	0	1	0	0	0	0	0
Вильнюс	Vilnius	1.50172	35	0	0	0	0	0	0	0	0	0	0	0	0	0	0	0	0	0	0	0	0	0	0	0	0	0	0	0	0	0	0	0	0	0	0	0	0	0	0	1	0
Оренбург/Чкалов	Orenburg	1.4924	10	0	0	0	0	0	0	0	0	0	0	0	0	0	0	0	0	0	0	0	0	0	0	0	1	0	0	0	0	0	0	0	0	0	0	0	0	0	0	0	0
Кишинев	Chisinau	1.49123	28	0	0	0	0	0	0	0	0	0	0	0	0	0	0	0	0	1	0	0	0	0	0	0	0	0	0	0	0	0	0	0	0	0	0	0	0	0	0	0	0
Горловка	Horlivka	1.47035	1	0	0	0	0	0	0	0	0	0	0	1	0	0	0	0	0	0	0	0	0	0	0	0	0	0	0	0	0	0	0	0	0	0	0	0	0	0	0	0	0
Архангельск	Arkhangelsk	1.44449	5	1	0	0	0	0	0	0	0	0	0	0	0	0	0	0	0	0	0	0	0	0	0	0	0	0	0	0	0	0	0	0	0	0	0	0	0	0	0	0	0
Калинин	Tver	1.4204	14	0	1	0	0	0	0	0	0	0	0	0	0	0	0	0	0	0	0	0	0	0	0	0	0	0	0	0	0	0	0	0	0	0	0	0	0	0	0	0	0
Рязань	Ryazan	1.41416	11	0	1	0	0	0	0	0	0	0	0	0	0	0	0	0	0	0	0	0	0	0	0	0	0	0	0	0	0	0	0	0	0	0	0	0	0	0	0	0	0
Ульяновск	Ulyanovsk	1.40297	15	0	0	0	0	0	0	1	0	0	0	0	0	0	0	0	0	0	0	0	0	0	0	0	0	0	0	0	0	0	0	0	0	0	0	0	0	0	0	0	0
Томск	Tomsk	1.39892	6	0	0	0	0	0	0	0	0	0	0	0	0	0	0	0	0	0	0	0	0	0	0	0	0	0	1	0	0	0	0	0	0	0	0	0	0	0	0	0	0
Николаев	Mykolaiv	1.39213	11	0	0	0	0	0	0	0	0	0	0	0	0	0	0	0	0	0	0	0	0	0	0	0	0	0	0	0	0	0	0	0	1	0	0	0	0	0	0	0	0
Киров	Kirov	1.38763	8	0	0	0	0	0	1	0	0	0	0	0	0	0	0	0	0	0	0	0	0	0	0	0	0	0	0	0	0	0	0	0	0	0	0	0	0	0	0	0	0
Самарканд	Samarkand	1.35678	3	0	0	0	0	0	0	0	0	0	0	0	0	0	0	0	0	0	0	0	0	0	0	0	0	0	0	0	0	1	0	0	0	0	0	0	0	0	0	0	0
Брянск	Bryansk	1.35022	11	0	0	0	1	0	0	0	0	0	0	0	0	0	0	0	0	0	0	0	0	0	0	0	0	0	0	0	0	0	0	0	0	0	0	0	0	0	0	0	0
Грозный	Grozny	1.34976	7	0	0	0	0	0	0	0	0	0	0	0	0	0	0	0	0	0	0	0	0	0	0	0	0	0	0	0	0	0	1	0	0	0	0	0	0	0	0	0	0
Мурманск	Murmansk	1.26412	6	1	0	0	0	0	0	0	0	0	0	0	0	0	0	0	0	0	0	0	0	0	0	0	0	0	0	0	0	0	0	0	0	0	0	0	0	0	0	0	0
Каунас	Kaunas	1.23402	10	0	0	0	0	0	0	0	0	0	0	0	0	0	0	0	0	0	0	0	0	0	0	0	0	0	0	0	0	0	0	0	0	0	0	0	0	0	0	1	0
Липецк	Lipetsk	1.23288	6	0	0	0	0	0	0	0	0	0	0	0	0	0	0	0	0	0	0	0	0	0	0	0	0	0	0	0	0	0	0	0	0	0	0	0	0	0	0	0	1
Курск	Kursk	1.19601	19	0	0	0	0	0	0	0	0	0	0	0	0	0	0	0	0	0	0	0	0	0	0	0	0	0	0	0	0	0	0	0	0	0	0	0	0	0	0	0	1
Калининград	Kaliningrad	1.18569	8	0	0	0	0	0	0	0	0	0	0	0	1	0	0	0	0	0	0	0	0	0	0	0	0	0	0	0	0	0	0	0	0	0	0	0	0	0	0	0	0
Гомель	Gomel	1.16904	3	0	0	0	0	0	0	0	0	0	0	0	0	1	0	0	0	0	0	0	0	0	0	0	0	0	0	0	0	0	0	0	0	0	0	0	0	0	0	0	0
Прокопьевск	Prokopyevsk	1.16711	2	0	0	0	0	0	0	0	0	0	0	0	0	0	0	0	0	0	0	0	0	0	0	0	0	0	1	0	0	0	0	0	0	0	0	0	0	0	0	0	0
Тольятти/Ставрополь-на-Волге	Tolyatti	1.12001	8	0	0	0	0	0	0	1	0	0	0	0	0	0	0	0	0	0	0	0	0	0	0	0	0	0	0	0	0	0	0	0	0	0	0	0	0	0	0	0	0
Херсон	Kherson	1.07413	1	0	0	0	0	0	0	0	0	0	0	0	0	0	0	0	0	0	0	0	0	0	0	0	0	0	0	0	0	0	0	0	1	0	0	0	0	0	0	0	0
Тюмень	Tyumen	1.06663	6	0	0	0	0	0	0	0	0	0	0	0	0	0	0	0	0	0	0	0	0	0	0	1	0	0	0	0	0	0	0	0	0	0	0	0	0	0	0	0	0
Симферополь	Simferopol	1.04587	4	0	0	0	0	0	0	0	0	0	0	0	0	0	0	1	0	0	0	0	0	0	0	0	0	0	0	0	0	0	0	0	0	0	0	0	0	0	0	0	0
Ашхабад	Ashgabat	1.0312	9	0	0	0	0	0	0	0	0	0	0	0	0	0	0	0	0	0	0	0	0	0	0	0	0	1	0	0	0	0	0	0	0	0	0	0	0	0	0	0	0
Таганрог	Taganrog	1.02461	6	0	0	0	0	0	0	0	0	1	0	0	0	0	0	0	0	0	0	0	0	0	0	0	0	0	0	0	0	0	0	0	0	0	0	0	0	0	0	0	0
Улан-Удэ	Ulan-Ude	1.01626	2	0	0	0	0	0	0	0	0	0	0	0	0	0	0	0	0	0	0	0	0	0	0	0	0	0	0	1	0	0	0	0	0	0	0	0	0	0	0	0	0
Дзержинск	Dzerzhinsk	1.00424	0	0	0	0	0	0	1	0	0	0	0	0	0	0	0	0	0	0	0	0	0	0	0	0	0	0	0	0	0	0	0	0	0	0	0	0	0	0	0	0	0
Чимкент	Shymkent	0.994254	8	0	0	0	0	0	0	0	0	0	0	0	0	0	0	0	0	0	0	0	0	1	0	0	0	0	0	0	0	0	0	0	0	0	0	0	0	0	0	0	0
Чита	Chita	0.991932	0	0	0	0	0	0	0	0	0	0	0	0	0	0	0	0	0	0	0	0	0	0	0	0	0	0	0	1	0	0	0	0	0	0	0	0	0	0	0	0	0
Днепродзержинск	Kamianske	0.975606	15	0	0	0	0	0	0	0	0	0	0	0	0	0	1	0	0	0	0	0	0	0	0	0	0	0	0	0	0	0	0	0	0	0	0	0	0	0	0	0	0
Севастополь	Sevastopol	0.974347	29	0	0	0	0	0	0	0	0	0	0	0	0	0	0	1	0	0	0	0	0	0	0	0	0	0	0	0	0	0	0	0	0	0	0	0	0	0	0	0	0
Орджоникидзе/Дзауджикау	Vladikavkaz	0.96631	10	0	0	0	0	0	0	0	0	0	0	0	0	0	0	0	0	0	0	0	0	0	0	0	0	0	0	0	0	0	1	0	0	0	0	0	0	0	0	0	0
Курган	Kurgan	0.962959	5	0	0	0	0	0	0	0	0	0	0	0	0	0	0	0	0	0	0	0	0	0	0	1	0	0	0	0	0	0	0	0	0	0	0	0	0	0	0	0	0
Владимир	Vladimir	0.961389	18	0	1	0	0	0	0	0	0	0	0	0	0	0	0	0	0	0	0	0	0	0	0	0	0	0	0	0	0	0	0	0	0	0	0	0	0	0	0	0	0
Семипалатинск	Semey	0.957394	1	0	0	0	0	0	0	0	0	0	0	0	0	0	0	0	0	0	0	0	1	0	0	0	0	0	0	0	0	0	0	0	0	0	0	0	0	0	0	0	0
Смоленск	Smolensk	0.954024	5	0	0	0	1	0	0	0	0	0	0	0	0	0	0	0	0	0	0	0	0	0	0	0	0	0	0	0	0	0	0	0	0	0	0	0	0	0	0	0	0
Орел	Oryol	0.949966	5	0	0	0	0	0	0	0	0	0	0	0	0	0	0	0	0	0	0	0	0	0	0	0	0	0	0	0	0	0	0	0	0	0	0	0	0	0	0	0	1
Витебск	Vitebsk	0.937555	10	0	0	0	0	0	0	0	0	0	0	0	0	1	0	0	0	0	0	0	0	0	0	0	0	0	0	0	0	0	0	0	0	0	0	0	0	0	0	0	0
Комсомольск-на-Амуре	Komsomolsk-on-Amur	0.935398	6	0	0	0	0	0	0	0	0	0	0	0	0	0	0	0	0	0	0	0	0	0	0	0	0	0	0	0	1	0	0	0	0	0	0	0	0	0	0	0	0
Тамбов	Tambov	0.935199	1	0	0	0	0	0	0	0	0	0	0	0	0	0	0	0	0	0	0	0	0	0	0	0	0	0	0	0	0	0	0	0	0	0	0	0	0	0	0	0	1
Кострома	Kostroma	0.933303	5	0	0	0	1	0	0	0	0	0	0	0	0	0	0	0	0	0	0	0	0	0	0	0	0	0	0	0	0	0	0	0	0	0	0	0	0	0	0	0	0
Шахты	Shakhty	0.926264	1	0	0	0	0	0	0	0	0	1	0	0	0	0	0	0	0	0	0	0	0	0	0	0	0	0	0	0	0	0	0	0	0	0	0	0	0	0	0	0	0
Чебоксары	Cheboksary	0.916844	6	0	0	0	0	0	1	0	0	0	0	0	0	0	0	0	0	0	0	0	0	0	0	0	0	0	0	0	0	0	0	0	0	0	0	0	0	0	0	0	0
Орск	Orsk	0.908779	3	0	0	0	0	0	0	0	0	0	0	0	0	0	0	0	0	0	0	0	0	0	0	0	1	0	0	0	0	0	0	0	0	0	0	0	0	0	0	0	0
Усть-Каменогорск	Oskemen	0.906518	11	0	0	0	0	0	0	0	0	0	0	0	0	0	0	0	0	0	0	0	1	0	0	0	0	0	0	0	0	0	0	0	0	0	0	0	0	0	0	0	0
Рыбинск/Андропов	Rybinsk	0.894459	2	0	0	0	1	0	0	0	0	0	0	0	0	0	0	0	0	0	0	0	0	0	0	0	0	0	0	0	0	0	0	0	0	0	0	0	0	0	0	0	0
Полтава	Poltava	0.88638	4	0	0	0	0	0	0	0	0	0	0	0	0	0	0	0	0	0	0	0	0	0	0	0	0	0	0	0	0	0	0	0	0	0	1	0	0	0	0	0	0
Винница	Vinnytsia	0.886194	6	0	0	0	0	0	0	0	0	0	0	0	0	0	0	0	1	0	0	0	0	0	0	0	0	0	0	0	0	0	0	0	0	0	0	0	0	0	0	0	0
Могилев	Mogilev	0.842911	1	0	0	0	0	0	0	0	0	0	0	0	0	1	0	0	0	0	0	0	0	0	0	0	0	0	0	0	0	0	0	0	0	0	0	0	0	0	0	0	0
Калуга	Kaluga	0.842167	6	0	1	0	0	0	0	0	0	0	0	0	0	0	0	0	0	0	0	0	0	0	0	0	0	0	0	0	0	0	0	0	0	0	0	0	0	0	0	0	0
Сочи	Sochi	0.836361	16	0	0	0	0	0	0	0	0	0	1	0	0	0	0	0	0	0	0	0	0	0	0	0	0	0	0	0	0	0	0	0	0	0	0	0	0	0	0	0	0
Ставрополь	Stavropol	0.826928	7	0	0	0	0	0	0	0	0	0	1	0	0	0	0	0	0	0	0	0	0	0	0	0	0	0	0	0	0	0	0	0	0	0	0	0	0	0	0	0	0
Ангарск	Angarsk	0.813186	6	0	0	0	0	0	0	0	0	0	0	0	0	0	0	0	0	0	0	0	0	0	0	0	0	0	0	1	0	0	0	0	0	0	0	0	0	0	0	0	0
Махачкала	Makhachkala	0.804242	1	0	0	0	0	0	0	0	0	0	0	0	0	0	0	0	0	0	0	0	0	0	0	0	0	0	0	0	0	0	1	0	0	0	0	0	0	0	0	0	0
Петрозаводск	Petrozavodsk	0.794396	3	1	0	0	0	0	0	0	0	0	0	0	0	0	0	0	0	0	0	0	0	0	0	0	0	0	0	0	0	0	0	0	0	0	0	0	0	0	0	0	0
Вологда	Vologda	0.791935	5	1	0	0	0	0	0	0	0	0	0	0	0	0	0	0	0	0	0	0	0	0	0	0	0	0	0	0	0	0	0	0	0	0	0	0	0	0	0	0	0
Краматорск	Kramatorsk	0.781562	2	0	0	0	0	0	0	0	0	0	0	1	0	0	0	0	0	0	0	0	0	0	0	0	0	0	0	0	0	0	0	0	0	0	0	0	0	0	0	0	0
Кировабад	Ganja	0.778662	4	0	0	0	0	0	0	0	0	0	0	0	0	0	0	0	0	0	0	1	0	0	0	0	0	0	0	0	0	0	0	0	0	0	0	0	0	0	0	0	0
Воркута	Vorkuta	0.778287	8	1	0	0	0	0	0	0	0	0	0	0	0	0	0	0	0	0	0	0	0	0	0	0	0	0	0	0	0	0	0	0	0	0	0	0	0	0	0	0	0
Саранск	Saransk	0.775272	3	0	0	0	0	0	1	0	0	0	0	0	0	0	0	0	0	0	0	0	0	0	0	0	0	0	0	0	0	0	0	0	0	0	0	0	0	0	0	0	0
Джамбул	Taraz	0.774531	0	0	0	0	0	0	0	0	0	0	0	0	0	0	0	0	0	0	0	0	0	1	0	0	0	0	0	0	0	0	0	0	0	0	0	0	0	0	0	0	0
Павлодар	Pavlodar	0.773482	10	0	0	0	0	0	0	0	0	0	0	0	0	0	0	0	0	0	0	0	1	0	0	0	0	0	0	0	0	0	0	0	0	0	0	0	0	0	0	0	0
Бийск	Biysk	0.771804	2	0	0	0	0	0	0	0	0	0	0	0	0	0	0	0	0	0	0	0	0	0	0	0	0	0	1	0	0	0	0	0	0	0	0	0	0	0	0	0	0
Стаханов/Кадиевка	Kadiivka	0.771286	0	0	0	0	0	0	0	0	0	0	0	1	0	0	0	0	0	0	0	0	0	0	0	0	0	0	0	0	0	0	0	0	0	0	0	0	0	0	0	0	0
Кировоград	Kropyvnytskyi	0.769808	0	0	0	0	0	0	0	0	0	0	0	0	0	0	0	0	1	0	0	0	0	0	0	0	0	0	0	0	0	0	0	0	0	0	0	0	0	0	0	0	0
Черновцы	Chernivtsi	0.76216	1	0	0	0	0	0	0	0	0	0	0	0	0	0	0	0	0	0	0	0	0	0	0	0	0	0	0	0	0	0	0	0	0	1	0	0	0	0	0	0	0
Андижан	Andijan	0.760653	2	0	0	0	0	0	0	0	0	0	0	0	0	0	0	0	0	0	0	0	0	0	0	0	0	0	0	0	0	1	0	0	0	0	0	0	0	0	0	0	0
Златоуст	Zlatoust	0.757953	0	0	0	0	0	0	0	0	0	0	0	0	0	0	0	0	0	0	0	0	0	0	0	1	0	0	0	0	0	0	0	0	0	0	0	0	0	0	0	0	0
Череповец	Cherepovets	0.745381	18	1	0	0	0	0	0	0	0	0	0	0	0	0	0	0	0	0	0	0	0	0	0	0	0	0	0	0	0	0	0	0	0	0	0	0	0	0	0	0	0
Наманган	Namangan	0.727422	0	0	0	0	0	0	0	0	0	0	0	0	0	0	0	0	0	0	0	0	0	0	0	0	0	0	0	0	0	1	0	0	0	0	0	0	0	0	0	0	0
Енакиево	Yenakijeve	0.717259	1	0	0	0	0	0	0	0	0	0	0	1	0	0	0	0	0	0	0	0	0	0	0	0	0	0	0	0	0	0	0	0	0	0	0	0	0	0	0	0	0
Норильск	Norilsk	0.715119	14	0	0	0	0	0	0	0	0	0	0	0	0	0	0	0	0	0	0	0	0	0	0	0	0	0	0	0	0	0	0	1	0	0	0	0	0	0	0	0	0
Ленинск-Кузнецкий	Leninsk-Kuznetsky	0.713479	1	0	0	0	0	0	0	0	0	0	0	0	0	0	0	0	0	0	0	0	0	0	0	0	0	0	1	0	0	0	0	0	0	0	0	0	0	0	0	0	0
Целиноград/Акмолинск	Astana	0.713046	7	0	0	0	0	0	0	0	0	0	0	0	0	0	0	0	0	0	0	0	1	0	0	0	0	0	0	0	0	0	0	0	0	0	0	0	0	0	0	0	0
Стерлитамак	Sterlitamak	0.713031	0	0	0	0	0	0	0	0	0	0	0	0	0	0	0	0	0	0	0	0	0	0	0	0	1	0	0	0	0	0	0	0	0	0	0	0	0	0	0	0	0
Петропавловск	Petropavl	0.710986	1	0	0	0	0	0	0	0	0	0	0	0	0	0	0	0	0	0	0	0	1	0	0	0	0	0	0	0	0	0	0	0	0	0	0	0	0	0	0	0	0
Сызрань	Syzran	0.702934	1	0	0	0	0	0	0	1	0	0	0	0	0	0	0	0	0	0	0	0	0	0	0	0	0	0	0	0	0	0	0	0	0	0	0	0	0	0	0	0	0
Житомир	Zhytomyr	0.700497	2	0	0	0	0	0	0	0	0	0	0	0	0	0	0	0	1	0	0	0	0	0	0	0	0	0	0	0	0	0	0	0	0	0	0	0	0	0	0	0	0
Каменск-Уральский	Kamensk-Uralsky	0.696868	1	0	0	0	0	0	0	0	0	0	0	0	0	0	0	0	0	0	0	0	0	0	0	1	0	0	0	0	0	0	0	0	0	0	0	0	0	0	0	0	0
Подольск	Podolsk	0.695864	2	0	1	0	0	0	0	0	0	0	0	0	0	0	0	0	0	0	0	0	0	0	0	0	0	0	0	0	0	0	0	0	0	0	0	0	0	0	0	0	0
Новочеркасск	Novocherkassk	0.684682	0	0	0	0	0	0	0	0	0	1	0	0	0	0	0	0	0	0	0	0	0	0	0	0	0	0	0	0	0	0	0	0	0	0	0	0	0	0	0	0	0
Кутаиси	Kutaisi	0.676242	2	0	0	0	0	0	0	0	0	0	0	0	0	0	0	0	0	0	1	0	0	0	0	0	0	0	0	0	0	0	0	0	0	0	0	0	0	0	0	0	0
Сумы	Sumy	0.676216	3	0	0	0	0	0	0	0	0	0	0	0	0	0	0	0	0	0	0	0	0	0	0	0	0	0	0	0	0	0	0	0	0	0	1	0	0	0	0	0	0
Чернигов	Chernihiv	0.665541	3	0	0	0	0	0	0	0	0	0	0	0	0	0	0	0	0	0	0	0	0	0	0	0	0	0	0	0	0	0	0	0	0	0	1	0	0	0	0	0	0
Ленинакан	Gyumri	0.663374	1	0	0	0	0	0	0	0	0	0	0	0	0	0	0	0	0	0	0	0	0	0	0	0	0	0	0	0	0	0	0	0	0	0	0	0	0	1	0	0	0
Копейск	Kopeysk	0.656951	2	0	0	0	0	0	0	0	0	0	0	0	0	0	0	0	0	0	0	0	0	0	0	1	0	0	0	0	0	0	0	0	0	0	0	0	0	0	0	0	0
Петропавловск-Камчатский	Petropavlovsk-Kamchatsky	0.649072	8	0	0	0	0	0	0	0	0	0	0	0	0	0	0	0	0	0	0	0	0	0	0	0	0	0	0	0	0	0	0	1	0	0	0	0	0	0	0	0	0
Братск.	Bratsk	0.647982	23	0	0	0	0	0	0	0	0	0	0	0	0	0	0	0	0	0	0	0	0	0	0	0	0	0	0	1	0	0	0	0	0	0	0	0	0	0	0	0	0
Черкассы	Cherkasy	0.644053	1	0	0	0	0	0	0	0	0	0	0	0	0	0	0	0	1	0	0	0	0	0	0	0	0	0	0	0	0	0	0	0	0	0	0	0	0	0	0	0	0
Темиртау	Temirtau	0.638845	4	0	0	0	0	0	0	0	0	0	0	0	0	0	0	0	0	0	0	0	1	0	0	0	0	0	0	0	0	0	0	0	0	0	0	0	0	0	0	0	0
Белгород	Belgorod	0.629073	7	0	0	0	0	0	0	0	0	0	0	0	0	0	0	0	0	0	0	0	0	0	0	0	0	0	0	0	0	0	0	0	0	0	0	0	0	0	0	0	1
Йошкар-Ола	Yoshkar-Ola	0.626785	2	0	0	0	0	0	1	0	0	0	0	0	0	0	0	0	0	0	0	0	0	0	0	0	0	0	0	0	0	0	0	0	0	0	0	0	0	0	0	0	0
Нальчик	Nalchik	0.624015	2	0	0	0	0	0	0	0	0	0	0	0	0	0	0	0	0	0	0	0	0	0	0	0	0	0	0	0	0	0	1	0	0	0	0	0	0	0	0	0	0
Энгельс	Engels	0.62025	2	0	0	0	0	0	0	1	0	0	0	0	0	0	0	0	0	0	0	0	0	0	0	0	0	0	0	0	0	0	0	0	0	0	0	0	0	0	0	0	0
Красный Луч	Khrustalnyi	0.613167	1	0	0	0	0	0	0	0	0	0	0	1	0	0	0	0	0	0	0	0	0	0	0	0	0	0	0	0	0	0	0	0	0	0	0	0	0	0	0	0	0
Кременчуг	Kremenchuk	0.609038	9	0	0	0	0	0	0	0	0	0	0	0	0	0	0	0	0	0	0	0	0	0	0	0	0	0	0	0	0	0	0	0	0	0	1	0	0	0	0	0	0
Белово	Belovo	0.608176	0	0	0	0	0	0	0	0	0	0	0	0	0	0	0	0	0	0	0	0	0	0	0	0	0	0	1	0	0	0	0	0	0	0	0	0	0	0	0	0	0
Березники	Berezniki	0.60594	5	0	0	0	0	0	0	0	0	0	0	0	0	0	0	0	0	0	0	0	0	0	0	0	1	0	0	0	0	0	0	0	0	0	0	0	0	0	0	0	0
Актюбинск	Aktobe	0.603431	2	0	0	0	0	0	0	0	0	0	0	0	0	0	0	0	0	0	0	0	0	0	1	0	0	0	0	0	0	0	0	0	0	0	0	0	0	0	0	0	0
Новороссийск	Novorossiysk	0.594397	13	0	0	0	0	0	0	0	0	0	1	0	0	0	0	0	0	0	0	0	0	0	0	0	0	0	0	0	0	0	0	0	0	0	0	0	0	0	0	0	0
Уральск	Oral	0.594361	0	0	0	0	0	0	0	0	0	0	0	0	0	0	0	0	0	0	0	0	0	0	1	0	0	0	0	0	0	0	0	0	0	0	0	0	0	0	0	0	0
Волжский	Volzhsky	0.58997	14	0	0	0	0	0	0	0	1	0	0	0	0	0	0	0	0	0	0	0	0	0	0	0	0	0	0	0	0	0	0	0	0	0	0	0	0	0	0	0	0
Бобруйск	Babruysk	0.589801	1	0	0	0	0	0	0	0	0	0	0	0	0	1	0	0	0	0	0	0	0	0	0	0	0	0	0	0	0	0	0	0	0	0	0	0	0	0	0	0	0
Армавир	Armavir	0.58311	0	0	0	0	0	0	0	0	0	0	1	0	0	0	0	0	0	0	0	0	0	0	0	0	0	0	0	0	0	0	0	0	0	0	0	0	0	0	0	0	0
Рубцовск	Rubtsovsk	0.577424	1	0	0	0	0	0	0	0	0	0	0	0	0	0	0	0	0	0	0	0	0	0	0	0	0	0	1	0	0	0	0	0	0	0	0	0	0	0	0	0	0
Северодвинск	Severodvinsk	0.575908	0	1	0	0	0	0	0	0	0	0	0	0	0	0	0	0	0	0	0	0	0	0	0	0	0	0	0	0	0	0	0	0	0	0	0	0	0	0	0	0	0
Первоуральск	Pervouralsk	0.574625	2	0	0	0	0	0	0	0	0	0	0	0	0	0	0	0	0	0	0	0	0	0	0	1	0	0	0	0	0	0	0	0	0	0	0	0	0	0	0	0	0
Миасс	Miass	0.567141	2	0	0	0	0	0	0	0	0	0	0	0	0	0	0	0	0	0	0	0	0	0	0	1	0	0	0	0	0	0	0	0	0	0	0	0	0	0	0	0	0
Клайпеда	Klaipeda	0.564528	5	0	0	0	0	0	0	0	0	0	0	0	0	0	0	0	0	0	0	0	0	0	0	0	0	0	0	0	0	0	0	0	0	0	0	0	0	0	0	1	0
Славянск	Slovyansk	0.562066	1	0	0	0	0	0	0	0	0	0	0	1	0	0	0	0	0	0	0	0	0	0	0	0	0	0	0	0	0	0	0	0	0	0	0	0	0	0	0	0	0
Киселевск	Kiselevsk	0.55385	1	0	0	0	0	0	0	0	0	0	0	0	0	0	0	0	0	0	0	0	0	0	0	0	0	0	1	0	0	0	0	0	0	0	0	0	0	0	0	0	0
Фергана	Fergana	0.548626	2	0	0	0	0	0	0	0	0	0	0	0	0	0	0	0	0	0	0	0	0	0	0	0	0	0	0	0	0	1	0	0	0	0	0	0	0	0	0	0	0
Гродно	Grodno	0.546837	1	0	0	0	0	0	0	0	0	0	0	0	0	1	0	0	0	0	0	0	0	0	0	0	0	0	0	0	0	0	0	0	0	0	0	0	0	0	0	0	0
Благовещенск	Blagoveshchensk	0.546168	0	0	0	0	0	0	0	0	0	0	0	0	0	0	0	0	0	0	0	0	0	0	0	0	0	0	0	0	1	0	0	0	0	0	0	0	0	0	0	0	0
Коканд	Kokand	0.545631	1	0	0	0	0	0	0	0	0	0	0	0	0	0	0	0	0	0	0	0	0	0	0	0	0	0	0	0	0	1	0	0	0	0	0	0	0	0	0	0	0
Мелитополь	Melitopol	0.544186	0	0	0	0	0	0	0	0	0	0	0	0	0	0	1	0	0	0	0	0	0	0	0	0	0	0	0	0	0	0	0	0	0	0	0	0	0	0	0	0	0
Люберцы	Lyubertsy	0.544031	8	0	1	0	0	0	0	0	0	0	0	0	0	0	0	0	0	0	0	0	0	0	0	0	0	0	0	0	0	0	0	0	0	0	0	0	0	0	0	0	0
Новомосковск/Сталиногорск	Novomoskovsk	0.543517	5	0	1	0	0	0	0	0	0	0	0	0	0	0	0	0	0	0	0	0	0	0	0	0	0	0	0	0	0	0	0	0	0	0	0	0	0	0	0	0	0
Сыктывкар	Syktyvkar	0.543435	4	1	0	0	0	0	0	0	0	0	0	0	0	0	0	0	0	0	0	0	0	0	0	0	0	0	0	0	0	0	0	0	0	0	0	0	0	0	0	0	0
Сумгаит	Sumqayit	0.543394	10	0	0	0	0	0	0	0	0	0	0	0	0	0	0	0	0	0	0	1	0	0	0	0	0	0	0	0	0	0	0	0	0	0	0	0	0	0	0	0	0
Коломна	Kolomna	0.533923	10	0	1	0	0	0	0	0	0	0	0	0	0	0	0	0	0	0	0	0	0	0	0	0	0	0	0	0	0	0	0	0	0	0	0	0	0	0	0	0	0
Керчь	Kerch	0.53309	3	0	0	0	0	0	0	0	0	0	0	0	0	0	0	1	0	0	0	0	0	0	0	0	0	0	0	0	0	0	0	0	0	0	0	0	0	0	0	0	0
Уссурийск	Ussuriysk	0.530024	0	0	0	0	0	0	0	0	0	0	0	0	0	0	0	0	0	0	0	0	0	0	0	0	0	0	0	0	1	0	0	0	0	0	0	0	0	0	0	0	0
Коммунарск/Ворошиловск	Alchevsk	0.529101	2	0	0	0	0	0	0	0	0	0	0	1	0	0	0	0	0	0	0	0	0	0	0	0	0	0	0	0	0	0	0	0	0	0	0	0	0	0	0	0	0
Псков	Pskov	0.527955	1	1	0	0	0	0	0	0	0	0	0	0	0	0	0	0	0	0	0	0	0	0	0	0	0	0	0	0	0	0	0	0	0	0	0	0	0	0	0	0	0
Новгород	Veliky Novgorod	0.524738	6	1	0	0	0	0	0	0	0	0	0	0	0	0	0	0	0	0	0	0	0	0	0	0	0	0	0	0	0	0	0	0	0	0	0	0	0	0	0	0	0
Серпухов	Serpukhov	0.518917	4	0	1	0	0	0	0	0	0	0	0	0	0	0	0	0	0	0	0	0	0	0	0	0	0	0	0	0	0	0	0	0	0	0	0	0	0	0	0	0	0
Кустанай	Kostanay	0.517435	4	0	0	0	0	0	0	0	0	0	0	0	0	0	0	0	0	0	0	0	1	0	0	0	0	0	0	0	0	0	0	0	0	0	0	0	0	0	0	0	0
Брест	Brest	0.510666	5	0	0	0	0	0	0	0	0	0	0	0	0	1	0	0	0	0	0	0	0	0	0	0	0	0	0	0	0	0	0	0	0	0	0	0	0	0	0	0	0
Ковров	Kovrov	0.509066	0	0	0	1	0	0	0	0	0	0	0	0	0	0	0	0	0	0	0	0	0	0	0	0	0	0	0	0	0	0	0	0	0	0	0	0	0	0	0	0	0
Орехово-Зуево	Orekhovo-Zuyevo	0.506797	2	0	1	0	0	0	0	0	0	0	0	0	0	0	0	0	0	0	0	0	0	0	0	0	0	0	0	0	0	0	0	0	0	0	0	0	0	0	0	0	0
Якутск	Yakutsk	0.504213	4	0	0	0	0	0	0	0	0	0	0	0	0	0	0	0	0	0	0	0	0	0	0	0	0	0	0	0	0	0	0	1	0	0	0	0	0	0	0	0	0
Электросталь	Elektrostal	0.501635	9	0	1	0	0	0	0	0	0	0	0	0	0	0	0	0	0	0	0	0	0	0	0	0	0	0	0	0	0	0	0	0	0	0	0	0	0	0	0	0	0
Мытищи	Mytishchi	0.499914	11	0	1	0	0	0	0	0	0	0	0	0	0	0	0	0	0	0	0	0	0	0	0	0	0	0	0	0	0	0	0	0	0	0	0	0	0	0	0	0	0
Бухара	Bukhara	0.499684	4	0	0	0	0	0	0	0	0	0	0	0	0	0	0	0	0	0	0	0	0	0	0	0	0	0	0	0	0	1	0	0	0	0	0	0	0	0	0	0	0
Никополь	Nikopol	0.490029	1	0	0	0	0	0	0	0	0	0	0	0	0	0	1	0	0	0	0	0	0	0	0	0	0	0	0	0	0	0	0	0	0	0	0	0	0	0	0	0	0
Пятигорск	Pyatigorsk	0.487215	6	0	0	0	0	0	0	0	0	0	1	0	0	0	0	0	0	0	0	0	0	0	0	0	0	0	0	0	0	0	0	0	0	0	0	0	0	0	0	0	0
Черемхово	Cheremkhovo	0.485632	0	0	0	0	0	0	0	0	0	0	0	0	0	0	0	0	0	0	0	0	0	0	0	0	0	0	0	1	0	0	0	0	0	0	0	0	0	0	0	0	0
Ош	Osh	0.485194	1	0	0	0	0	0	0	0	0	0	0	0	0	0	0	0	0	0	0	0	0	0	0	0	0	0	0	0	0	0	0	0	0	0	0	0	1	0	0	0	0
Ровно	Rivne	0.482069	2	0	0	0	0	0	0	0	0	0	0	0	0	0	0	0	0	0	0	0	0	0	0	0	0	0	0	0	0	0	0	0	0	1	0	0	0	0	0	0	0
Новошахтинск	Novoshakhtinsk	0.477744	0	0	0	0	0	0	0	0	0	1	0	0	0	0	0	0	0	0	0	0	0	0	0	0	0	0	0	0	0	0	0	0	0	0	0	0	0	0	0	0	0
Ялта	Yalta	0.476549	15	0	0	0	0	0	0	0	0	0	0	0	0	0	0	1	0	0	0	0	0	0	0	0	0	0	0	0	0	0	0	0	0	0	0	0	0	0	0	0	0
Хмельницкий	Khmelnytskyi	0.473997	0	0	0	0	0	0	0	0	0	0	0	0	0	0	0	0	1	0	0	0	0	0	0	0	0	0	0	0	0	0	0	0	0	0	0	0	0	0	0	0	0
Анжеро-Судженск	Anzhero-Sudzhensk	0.47356	1	0	0	0	0	0	0	0	0	0	0	0	0	0	0	0	0	0	0	0	0	0	0	0	0	0	1	0	0	0	0	0	0	0	0	0	0	0	0	0	0
Чистяково/Торез	Chystiakove	0.473421	0	0	0	0	0	0	0	0	0	0	0	1	0	0	0	0	0	0	0	0	0	0	0	0	0	0	0	0	0	0	0	0	0	0	0	0	0	0	0	0	0
Кзыл-Орда	Kyzylorda	0.472519	0	0	0	0	0	0	0	0	0	0	0	0	0	0	0	0	0	0	0	0	0	1	0	0	0	0	0	0	0	0	0	0	0	0	0	0	0	0	0	0	0
Южно-Сахалинск	Yuzhno-Sakhalinsk	0.470469	4	0	0	0	0	0	0	0	0	0	0	0	0	0	0	0	0	0	0	0	0	0	0	0	0	0	0	0	1	0	0	0	0	0	0	0	0	0	0	0	0
Набережные Челны/Брежнев	Naberezhnye Chelny	0.466101	9	0	0	0	0	0	1	0	0	0	0	0	0	0	0	0	0	0	0	0	0	0	0	0	0	0	0	0	0	0	0	0	0	0	0	0	0	0	0	0	0
Чарджоу	Turkmenabat	0.459308	3	0	0	0	0	0	0	0	0	0	0	0	0	0	0	0	0	0	0	0	0	0	0	0	0	1	0	0	0	0	0	0	0	0	0	0	0	0	0	0	0
Артемовск	Bakhmut	0.457868	1	0	0	0	0	0	0	0	0	0	0	1	0	0	0	0	0	0	0	0	0	0	0	0	0	0	0	0	0	0	0	0	0	0	0	0	0	0	0	0	0
Находка	Nakhodka	0.456417	6	0	0	0	0	0	0	0	0	0	0	0	0	0	0	0	0	0	0	0	0	0	0	0	0	0	0	0	1	0	0	0	0	0	0	0	0	0	0	0	0
Белая Церковь	Bila Tserkva	0.454884	0	0	0	0	0	0	0	0	0	0	0	0	0	0	0	0	1	0	0	0	0	0	0	0	0	0	0	0	0	0	0	0	0	0	0	0	0	0	0	0	0
Гурьев	Atyrau	0.448828	1	0	0	0	0	0	0	0	0	0	0	0	0	0	0	0	0	0	0	0	0	0	1	0	0	0	0	0	0	0	0	0	0	0	0	0	0	0	0	0	0
Тирасполь	Tiraspol	0.446761	3	0	0	0	0	0	0	0	0	0	0	0	0	0	0	0	0	1	0	0	0	0	0	0	0	0	0	0	0	0	0	0	0	0	0	0	0	0	0	0	0
Осинники	Osinniki	0.446044	0	0	0	0	0	0	0	0	0	0	0	0	0	0	0	0	0	0	0	0	0	0	0	0	0	0	1	0	0	0	0	0	0	0	0	0	0	0	0	0	0
Майкоп	Maykop	0.445667	2	0	0	0	0	0	0	0	0	0	1	0	0	0	0	0	0	0	0	0	0	0	0	0	0	0	0	0	0	0	0	0	0	0	0	0	0	0	0	0	0
Ногинск	Noginsk	0.444962	0	0	1	0	0	0	0	0	0	0	0	0	0	0	0	0	0	0	0	0	0	0	0	0	0	0	0	0	0	0	0	0	0	0	0	0	0	0	0	0	0
Мичуринск	Michurinsk	0.441724	0	0	0	0	0	0	0	0	0	0	0	0	0	0	0	0	0	0	0	0	0	0	0	0	0	0	0	0	0	0	0	0	0	0	0	0	0	0	0	0	1
Ивано-Франковск/Станислав	Ivano-Frankivsk	0.44129	2	0	0	0	0	0	0	0	0	0	0	0	0	0	0	0	0	0	0	0	0	0	0	0	0	0	0	0	0	0	0	0	0	1	0	0	0	0	0	0	0
Лисичанск	Lysychansk	0.438921	2	0	0	0	0	0	0	0	0	0	0	1	0	0	0	0	0	0	0	0	0	0	0	0	0	0	0	0	0	0	0	0	0	0	0	0	0	0	0	0	0
Калининград МО	Korolyov	0.432433	1	0	1	0	0	0	0	0	0	0	0	0	0	0	0	0	0	0	0	0	0	0	0	0	0	0	0	0	0	0	0	0	0	0	0	0	0	0	0	0	0
Ленинабад	Khujand	0.431778	1	0	0	0	0	0	0	0	0	0	0	0	0	0	0	0	0	0	0	0	0	0	0	0	0	0	0	0	0	0	0	0	0	0	0	1	0	0	0	0	0
Константиновка	Kostyantynivka	0.429505	0	0	0	0	0	0	0	0	0	0	0	1	0	0	0	0	0	0	0	0	0	0	0	0	0	0	0	0	0	0	0	0	0	0	0	0	0	0	0	0	0
Красноармейск Донец	Pokrovsk	0.428796	0	0	0	0	0	0	0	0	0	0	0	1	0	0	0	0	0	0	0	0	0	0	0	0	0	0	0	0	0	0	0	0	0	0	0	0	0	0	0	0	0
Салават	Salavat	0.428496	0	0	0	0	0	0	0	0	0	0	0	0	0	0	0	0	0	0	0	0	0	0	0	0	1	0	0	0	0	0	0	0	0	0	0	0	0	0	0	0	0
Батуми	Batumi	0.426348	5	0	0	0	0	0	0	0	0	0	0	0	0	0	0	0	0	0	1	0	0	0	0	0	0	0	0	0	0	0	0	0	0	0	0	0	0	0	0	0	0
Муром	Murom	0.425637	0	0	0	0	1	0	0	0	0	0	0	0	0	0	0	0	0	0	0	0	0	0	0	0	0	0	0	0	0	0	0	0	0	0	0	0	0	0	0	0	0
Серов	Serov	0.424147	4	0	0	0	0	0	0	0	0	0	0	0	0	0	0	0	0	0	0	0	0	0	0	1	0	0	0	0	0	0	0	0	0	0	0	0	0	0	0	0	0
Чирчик	Circhik	0.420279	0	0	0	0	0	0	0	0	0	0	0	0	0	0	0	0	0	0	0	0	0	0	0	0	0	0	0	0	0	1	0	0	0	0	0	0	0	0	0	0	0
Джезказган	Zhezqazghan	0.418203	8	0	0	0	0	0	0	0	0	0	0	0	0	0	0	0	0	0	0	0	1	0	0	0	0	0	0	0	0	0	0	0	0	0	0	0	0	0	0	0	0
Маргилан	Margilan	0.412156	2	0	0	0	0	0	0	0	0	0	0	0	0	0	0	0	0	0	0	0	0	0	0	0	0	0	0	0	0	1	0	0	0	0	0	0	0	0	0	0	0
Кировакан	Vanadzor	0.411661	0	0	0	0	0	0	0	0	0	0	0	0	0	0	0	0	0	0	0	0	0	0	0	0	0	0	0	0	0	0	0	0	0	0	0	0	0	1	0	0	0
Кизел	Kizel	0.408424	0	0	0	0	0	0	0	0	0	0	0	0	0	0	0	0	0	0	0	0	0	0	0	0	1	0	0	0	0	0	0	0	0	0	0	0	0	0	0	0	0
Бельцы	Balti	0.406094	0	0	0	0	0	0	0	0	0	0	0	0	0	0	0	0	0	1	0	0	0	0	0	0	0	0	0	0	0	0	0	0	0	0	0	0	0	0	0	0	0
Елец	Elets	0.405419	0	0	0	0	0	0	0	0	0	0	0	0	0	0	0	0	0	0	0	0	0	0	0	0	0	0	0	0	0	0	0	0	0	0	0	0	0	0	0	0	1
Котлас	Kotlas	0.403795	2	1	0	0	0	0	0	0	0	0	0	0	0	0	0	0	0	0	0	0	0	0	0	0	0	0	0	0	0	0	0	0	0	0	0	0	0	0	0	0	0
Узловая	Uzlovaya	0.403009	0	0	0	1	0	0	0	0	0	0	0	0	0	0	0	0	0	0	0	0	0	0	0	0	0	0	0	0	0	0	0	0	0	0	0	0	0	0	0	0	0
Луцк	Lutsk	0.401335	0	0	0	0	0	0	0	0	0	0	0	0	0	0	0	0	0	0	0	0	0	0	0	0	0	0	0	0	0	0	0	0	0	1	0	0	0	0	0	0	0
Артем	Artyom	0.400287	0	0	0	0	0	0	0	0	0	0	0	0	0	0	0	0	0	0	0	0	0	0	0	0	0	0	0	0	1	0	0	0	0	0	0	0	0	0	0	0	0
Кинешма	Kineshma	0.399922	0	0	0	0	1	0	0	0	0	0	0	0	0	0	0	0	0	0	0	0	0	0	0	0	0	0	0	0	0	0	0	0	0	0	0	0	0	0	0	0	0
Харцызск	Khartsyzk	0.399887	0	0	0	0	0	0	0	0	0	0	0	1	0	0	0	0	0	0	0	0	0	0	0	0	0	0	0	0	0	0	0	0	0	0	0	0	0	0	0	0	0
Рустави	Rustavi	0.399204	13	0	0	0	0	0	0	0	0	0	0	0	0	0	0	0	0	0	1	0	0	0	0	0	0	0	0	0	0	0	0	0	0	0	0	0	0	0	0	0	0
Орша	Orsha	0.399015	1	0	0	0	0	0	0	0	0	0	0	0	0	1	0	0	0	0	0	0	0	0	0	0	0	0	0	0	0	0	0	0	0	0	0	0	0	0	0	0	0
Барановичи	Baranavichy	0.398777	1	0	0	0	0	0	0	0	0	0	0	0	0	1	0	0	0	0	0	0	0	0	0	0	0	0	0	0	0	0	0	0	0	0	0	0	0	0	0	0	0
Бердянск	Berdyansk	0.39754	0	0	0	0	0	0	0	0	0	0	0	0	0	0	1	0	0	0	0	0	0	0	0	0	0	0	0	0	0	0	0	0	0	0	0	0	0	0	0	0	0
Магадан	Magadan	0.394077	6	0	0	0	0	0	0	0	0	0	0	0	0	0	0	0	0	0	0	0	0	0	0	0	0	0	0	0	0	0	0	1	0	0	0	0	0	0	0	0	0
Балаково	Balakovo	0.393629	4	0	0	0	0	0	0	1	0	0	0	0	0	0	0	0	0	0	0	0	0	0	0	0	0	0	0	0	0	0	0	0	0	0	0	0	0	0	0	0	0
Канск	Kansk	0.390406	0	0	0	0	0	0	0	0	0	0	0	0	0	0	0	0	0	0	0	0	0	0	0	0	0	0	0	1	0	0	0	0	0	0	0	0	0	0	0	0	0
Свердловск (Луганск обл)	Dovzhansk	0.390215	0	0	0	0	0	0	0	0	0	0	0	1	0	0	0	0	0	0	0	0	0	0	0	0	0	0	0	0	0	0	0	0	0	0	0	0	0	0	0	0	0
Даугавпилс	Daugavpils	0.390175	1	0	0	0	0	0	0	0	0	0	0	0	0	0	0	0	0	0	0	0	0	0	0	0	0	0	0	0	0	0	0	0	0	0	0	0	0	0	1	0	0
Сухуми	Sokhumi	0.389177	9	0	0	0	0	0	0	0	0	0	0	0	0	0	0	0	0	0	1	0	0	0	0	0	0	0	0	0	0	0	0	0	0	0	0	0	0	0	0	0	0
Краснодон	Sorokyne	0.384303	2	0	0	0	0	0	0	0	0	0	0	1	0	0	0	0	0	0	0	0	0	0	0	0	0	0	0	0	0	0	0	0	0	0	0	0	0	0	0	0	0
Соликамск	Solikamsk	0.383116	1	0	0	0	0	0	0	0	0	0	0	0	0	0	0	0	0	0	0	0	0	0	0	0	1	0	0	0	0	0	0	0	0	0	0	0	0	0	0	0	0
Тернополь	Ternopil	0.382815	3	0	0	0	0	0	0	0	0	0	0	0	0	0	0	0	0	0	0	0	0	0	0	0	0	0	0	0	0	0	0	0	0	1	0	0	0	0	0	0	0
Новокуйбышевск	Novokuybyshevsk	0.381852	5	0	0	0	0	0	0	1	0	0	0	0	0	0	0	0	0	0	0	0	0	0	0	0	0	0	0	0	0	0	0	0	0	0	0	0	0	0	0	0	0
Загорск	Sergiyev Posad	0.381177	0	0	1	0	0	0	0	0	0	0	0	0	0	0	0	0	0	0	0	0	0	0	0	0	0	0	0	0	0	0	0	0	0	0	0	0	0	0	0	0	0
Балхаш	Balkhash	0.380852	3	0	0	0	0	0	0	0	0	0	0	0	0	0	0	0	0	0	0	0	1	0	0	0	0	0	0	0	0	0	0	0	0	0	0	0	0	0	0	0	0
Асбест	Asbest	0.380055	1	0	0	0	0	0	0	0	0	0	0	0	0	0	0	0	0	0	0	0	0	0	0	1	0	0	0	0	0	0	0	0	0	0	0	0	0	0	0	0	0
Ачинск	Achinsk	0.379448	1	0	0	0	0	0	0	0	0	0	0	0	0	0	0	0	0	0	0	0	0	0	0	0	0	0	0	1	0	0	0	0	0	0	0	0	0	0	0	0	0
Сарапул	Sarapul	0.379159	1	0	0	0	0	0	0	0	0	0	0	0	0	0	0	0	0	0	0	0	0	0	0	0	1	0	0	0	0	0	0	0	0	0	0	0	0	0	0	0	0
Лиепая	Liepaja	0.379091	0	0	0	0	0	0	0	0	0	0	0	0	0	0	0	0	0	0	0	0	0	0	0	0	0	0	0	0	0	0	0	0	0	0	0	0	0	0	1	0	0
Абакан	Abakan	0.377543	6	0	0	0	0	0	0	0	0	0	0	0	0	0	0	0	0	0	0	0	0	0	0	0	0	0	0	1	0	0	0	0	0	0	0	0	0	0	0	0	0
Кисловодск	Kislovodsk	0.376392	3	0	0	0	0	0	0	0	0	0	1	0	0	0	0	0	0	0	0	0	0	0	0	0	0	0	0	0	0	0	0	0	0	0	0	0	0	0	0	0	0
Тарту	Tartu	0.376215	9	0	0	0	0	1	0	0	0	0	0	0	0	0	0	0	0	0	0	0	0	0	0	0	0	0	0	0	0	0	0	0	0	0	0	0	0	0	0	0	0
Шяуляй	Siauliai	0.374009	2	0	0	0	0	0	0	0	0	0	0	0	0	0	0	0	0	0	0	0	0	0	0	0	0	0	0	0	0	0	0	0	0	0	0	0	0	0	0	1	0
Первомайск (Луганск обл)	Pervomaisk	0.372038	0	0	0	0	0	0	0	0	0	0	0	1	0	0	0	0	0	0	0	0	0	0	0	0	0	0	0	0	0	0	0	0	0	0	0	0	0	0	0	0	0
Балашиха	Balashikha	0.369206	3	0	1	0	0	0	0	0	0	0	0	0	0	0	0	0	0	0	0	0	0	0	0	0	0	0	0	0	0	0	0	0	0	0	0	0	0	0	0	0	0
Камышин	Kamyshin	0.366196	4	0	0	0	0	0	0	0	1	0	0	0	0	0	0	0	0	0	0	0	0	0	0	0	0	0	0	0	0	0	0	0	0	0	0	0	0	0	0	0	0
Чапаевск	Chapayevsk	0.359245	0	0	0	0	0	0	0	1	0	0	0	0	0	0	0	0	0	0	0	0	0	0	0	0	0	0	0	0	0	0	0	0	0	0	0	0	0	0	0	0	0
Борисов	Barysaw	0.35253	0	0	0	0	0	0	0	0	0	0	0	0	0	1	0	0	0	0	0	0	0	0	0	0	0	0	0	0	0	0	0	0	0	0	0	0	0	0	0	0	0
Рудный	Rudny	0.351107	0	0	0	0	0	0	0	0	0	0	0	0	0	0	0	0	0	0	0	0	1	0	0	0	0	0	0	0	0	0	0	0	0	0	0	0	0	0	0	0	0
Троицк	Troitsk	0.350981	2	0	0	0	0	0	0	0	0	0	0	0	0	0	0	0	0	0	0	0	0	0	0	1	0	0	0	0	0	0	0	0	0	0	0	0	0	0	0	0	0
Ревда	Revda	0.348812	2	0	0	0	0	0	0	0	0	0	0	0	0	0	0	0	0	0	0	0	0	0	0	1	0	0	0	0	0	0	0	0	0	0	0	0	0	0	0	0	0
Химки	Khimki	0.345829	1	0	1	0	0	0	0	0	0	0	0	0	0	0	0	0	0	0	0	0	0	0	0	0	0	0	0	0	0	0	0	0	0	0	0	0	0	0	0	0	0
Белорецк	Beloretsk	0.345717	0	0	0	0	0	0	0	0	0	0	0	0	0	0	0	0	0	0	0	0	0	0	0	0	1	0	0	0	0	0	0	0	0	0	0	0	0	0	0	0	0
Феодосия	Feodosia	0.343605	0	0	0	0	0	0	0	0	0	0	0	0	0	0	0	1	0	0	0	0	0	0	0	0	0	0	0	0	0	0	0	0	0	0	0	0	0	0	0	0	0
Гуково	Gukovo	0.341924	0	0	0	0	0	0	0	0	0	1	0	0	0	0	0	0	0	0	0	0	0	0	0	0	0	0	0	0	0	0	0	0	0	0	0	0	0	0	0	0	0
Коркино	Korkino	0.341238	5	0	0	0	0	0	0	0	0	0	0	0	0	0	0	0	0	0	0	0	0	0	0	1	0	0	0	0	0	0	0	0	0	0	0	0	0	0	0	0	0
Альметьевск	Almetyevsk	0.340795	2	0	0	0	0	0	1	0	0	0	0	0	0	0	0	0	0	0	0	0	0	0	0	0	0	0	0	0	0	0	0	0	0	0	0	0	0	0	0	0	0
Великие Луки	Velikiye Luki	0.340782	0	1	0	0	0	0	0	0	0	0	0	0	0	0	0	0	0	0	0	0	0	0	0	0	0	0	0	0	0	0	0	0	0	0	0	0	0	0	0	0	0
Новотроицк	Novotroitsk	0.338802	0	0	0	0	0	0	0	0	0	0	0	0	0	0	0	0	0	0	0	0	0	0	0	1	0	0	0	0	0	0	0	0	0	0	0	0	0	0	0	0	0
Нукус	Nukus	0.33642	1	0	0	0	0	0	0	0	0	0	0	0	0	0	0	0	0	0	0	0	0	0	0	0	0	0	0	0	0	1	0	0	0	0	0	0	0	0	0	0	0
Батайск	Bataysk	0.336267	0	0	0	0	0	0	0	0	0	1	0	0	0	0	0	0	0	0	0	0	0	0	0	0	0	0	0	0	0	0	0	0	0	0	0	0	0	0	0	0	0
Александров	Aleksandrov	0.336036	0	0	1	0	0	0	0	0	0	0	0	0	0	0	0	0	0	0	0	0	0	0	0	0	0	0	0	0	0	0	0	0	0	0	0	0	0	0	0	0	0
Алмалык	Almalyk	0.335713	2	0	0	0	0	0	0	0	0	0	0	0	0	0	0	0	0	0	0	0	0	0	0	0	0	0	0	0	0	1	0	0	0	0	0	0	0	0	0	0	0
Балашов	Balashov	0.335692	0	0	0	0	0	0	0	1	0	0	0	0	0	0	0	0	0	0	0	0	0	0	0	0	0	0	0	0	0	0	0	0	0	0	0	0	0	0	0	0	0
Каменск-Шахтинский	Kamensk-Shakhtinsky	0.335227	1	0	0	0	0	0	0	0	0	1	0	0	0	0	0	0	0	0	0	0	0	0	0	0	0	0	0	0	0	0	0	0	0	0	0	0	0	0	0	0	0
Щелково	Shchyolkovo	0.334549	3	0	1	0	0	0	0	0	0	0	0	0	0	0	0	0	0	0	0	0	0	0	0	0	0	0	0	0	0	0	0	0	0	0	0	0	0	0	0	0	0
Губаха	Gubakha	0.332399	0	0	0	0	0	0	0	0	0	0	0	0	0	0	0	0	0	0	0	0	0	0	0	0	1	0	0	0	0	0	0	0	0	0	0	0	0	0	0	0	0
Лениногорск	Ridder	0.331696	0	0	0	0	0	0	0	0	0	0	0	0	0	0	0	0	0	0	0	0	1	0	0	0	0	0	0	0	0	0	0	0	0	0	0	0	0	0	0	0	0
Кокчетав	Kokshetau	0.329011	1	0	0	0	0	0	0	0	0	0	0	0	0	0	0	0	0	0	0	0	1	0	0	0	0	0	0	0	0	0	0	0	0	0	0	0	0	0	0	0	0
Ангрен	Angren	0.328767	1	0	0	0	0	0	0	0	0	0	0	0	0	0	0	0	0	0	0	0	0	0	0	0	0	0	0	0	0	1	0	0	0	0	0	0	0	0	0	0	0
Усолье-Сибирское	Usolye-Sibirskoye	0.328078	0	0	0	0	0	0	0	0	0	0	0	0	0	0	0	0	0	0	0	0	0	0	0	0	0	0	0	1	0	0	0	0	0	0	0	0	0	0	0	0	0
Димитровград/Мелекесс	Dimitrovgrad	0.327867	1	0	0	0	0	0	0	1	0	0	0	0	0	0	0	0	0	0	0	0	0	0	0	0	0	0	0	0	0	0	0	0	0	0	0	0	0	0	0	0	0
Александрия	Oleksandriia	0.327601	0	0	0	0	0	0	0	0	0	0	0	0	0	0	0	0	1	0	0	0	0	0	0	0	0	0	0	0	0	0	0	0	0	0	0	0	0	0	0	0	0
Кузнецк	Kuznetsk	0.325869	1	0	0	0	0	0	0	1	0	0	0	0	0	0	0	0	0	0	0	0	0	0	0	0	0	0	0	0	0	0	0	0	0	0	0	0	0	0	0	0	0
Ухта	Ukhta	0.324138	2	1	0	0	0	0	0	0	0	0	0	0	0	0	0	0	0	0	0	0	0	0	0	0	0	0	0	0	0	0	0	0	0	0	0	0	0	0	0	0	0
Октябрьский	Oktyabrsky	0.321522	0	0	0	0	0	0	0	0	0	0	0	0	0	0	0	0	0	0	0	0	0	0	0	0	1	0	0	0	0	0	0	0	0	0	0	0	0	0	0	0	0
Дзержинск (Донецк обла)	Toretsk	0.320584	0	0	0	0	0	0	0	0	0	0	0	1	0	0	0	0	0	0	0	0	0	0	0	0	0	0	0	0	0	0	0	0	0	0	0	0	0	0	0	0	0
Павлоград	Pavlohrad	0.320211	0	0	0	0	0	0	0	0	0	0	0	0	0	0	1	0	0	0	0	0	0	0	0	0	0	0	0	0	0	0	0	0	0	0	0	0	0	0	0	0	0
Лысьва	Lysva	0.319267	0	0	0	0	0	0	0	0	0	0	0	0	0	0	0	0	0	0	0	0	0	0	0	0	1	0	0	0	0	0	0	0	0	0	0	0	0	0	0	0	0
Евпатория	Yevpatoriya	0.319165	2	0	0	0	0	0	0	0	0	0	0	0	0	0	0	1	0	0	0	0	0	0	0	0	0	0	0	0	0	0	0	0	0	0	0	0	0	0	0	0	0
Кушва	Kushva	0.318774	0	0	0	0	0	0	0	0	0	0	0	0	0	0	0	0	0	0	0	0	0	0	0	1	0	0	0	0	0	0	0	0	0	0	0	0	0	0	0	0	0
Междуреченск	Mezhdurechensk	0.315848	1	0	0	0	0	0	0	0	0	0	0	0	0	0	0	0	0	0	0	0	0	0	0	0	0	0	1	0	0	0	0	0	0	0	0	0	0	0	0	0	0
Клин	Klin	0.312999	5	0	1	0	0	0	0	0	0	0	0	0	0	0	0	0	0	0	0	0	0	0	0	0	0	0	0	0	0	0	0	0	0	0	0	0	0	0	0	0	0
Невинномысск	Nevinnomyssk	0.312748	2	0	0	0	0	0	0	0	0	0	1	0	0	0	0	0	0	0	0	0	0	0	0	0	0	0	0	0	0	0	0	0	0	0	0	0	0	0	0	0	0
Небит-Даг	Balkanabat	0.311741	1	0	0	0	0	0	0	0	0	0	0	0	0	0	0	0	0	0	0	0	0	0	0	0	0	1	0	0	0	0	0	0	0	0	0	0	0	0	0	0	0
Воткинск	Votkinsk	0.311594	4	0	0	0	0	0	0	0	0	0	0	0	0	0	0	0	0	0	0	0	0	0	0	0	1	0	0	0	0	0	0	0	0	0	0	0	0	0	0	0	0
Зеленодольск	Zelenodolsk	0.310133	0	0	0	0	0	0	1	0	0	0	0	0	0	0	0	0	0	0	0	0	0	0	0	0	0	0	0	0	0	0	0	0	0	0	0	0	0	0	0	0	0
Кунгур	Kungur	0.308078	0	0	0	0	0	0	0	0	0	0	0	0	0	0	0	0	0	0	0	0	0	0	0	0	1	0	0	0	0	0	0	0	0	0	0	0	0	0	0	0	0
Вольск	Volsk	0.305494	0	0	0	0	0	0	0	1	0	0	0	0	0	0	0	0	0	0	0	0	0	0	0	0	0	0	0	0	0	0	0	0	0	0	0	0	0	0	0	0	0
Шахтерск	Shakhtarsk	0.302575	0	0	0	0	0	0	0	0	0	0	0	1	0	0	0	0	0	0	0	0	0	0	0	0	0	0	0	0	0	0	0	0	0	0	0	0	0	0	0	0	0
Ургенч	Urgench	0.302074	0	0	0	0	0	0	0	0	0	0	0	0	0	0	0	0	0	0	0	0	0	0	0	0	0	0	0	0	0	1	0	0	0	0	0	0	0	0	0	0	0
Бугульма	Bugulma	0.299578	0	0	0	0	0	0	1	0	0	0	0	0	0	0	0	0	0	0	0	0	0	0	0	0	0	0	0	0	0	0	0	0	0	0	0	0	0	0	0	0	0
Бендеры	Bender	0.297371	1	0	0	0	0	0	0	0	0	0	0	0	0	0	0	0	0	1	0	0	0	0	0	0	0	0	0	0	0	0	0	0	0	0	0	0	0	0	0	0	0
Паневежис	Panevezys	0.295835	4	0	0	0	0	0	0	0	0	0	0	0	0	0	0	0	0	0	0	0	0	0	0	0	0	0	0	0	0	0	0	0	0	0	0	0	0	0	0	1	0
Кохтла-Ярве	Kohtla-Jarve	0.289557	0	0	0	0	0	1	0	0	0	0	0	0	0	0	0	0	0	0	0	0	0	0	0	0	0	0	0	0	0	0	0	0	0	0	0	0	0	0	0	0	0
Мары	Mary	0.267225	1	0	0	0	0	0	0	0	0	0	0	0	0	0	0	0	0	0	0	0	0	0	0	0	0	1	0	0	0	0	0	0	0	0	0	0	0	0	0	0	0
Ташауз	Dashoguz	0.253949	0	0	0	0	0	0	0	0	0	0	0	0	0	0	0	0	0	0	0	0	0	0	0	0	0	1	0	0	0	0	0	0	0	0	0	0	0	0	0	0	0
Нарва	Narva	0.244107	2	0	0	0	0	1	0	0	0	0	0	0	0	0	0	0	0	0	0	0	0	0	0	0	0	0	0	0	0	0	0	0	0	0	0	0	0	0	0	0	0
Елгава	Jelgava	0.220268	2	0	0	0	0	0	0	0	0	0	0	0	0	0	0	0	0	0	0	0	0	0	0	0	0	0	0	0	0	0	0	0	0	0	0	0	0	0	1	0	0
Юрмала	Jurmala	0.212335	1	0	0	0	0	0	0	0	0	0	0	0	0	0	0	0	0	0	0	0	0	0	0	0	0	0	0	0	0	0	0	0	0	0	0	0	0	0	1	0	0
Пярну	Parnu	0.205494	0	0	0	0	0	1	0	0	0	0	0	0	0	0	0	0	0	0	0	0	0	0	0	0	0	0	0	0	0	0	0	0	0	0	0	0	0	0	0	0	0
Пржевальск	Karakol	0.191416	0	0	0	0	0	0	0	0	0	0	0	0	0	0	0	0	0	0	0	0	0	0	0	0	0	0	0	0	0	0	0	0	0	0	0	0	1	0	0	0	0
Джалал-Абад	Jalal-Abad	0.181347	0	0	0	0	0	0	0	0	0	0	0	0	0	0	0	0	0	0	0	0	0	0	0	0	0	0	0	0	0	0	0	0	0	0	0	0	1	0	0	0	0
Шеки/Нуха	Sheki	0.178937	0	0	0	0	0	0	0	0	0	0	0	0	0	0	0	0	0	0	0	1	0	0	0	0	0	0	0	0	0	0	0	0	0	0	0	0	0	0	0	0	0
Токмак	Tokmok	0.178866	0	0	0	0	0	0	0	0	0	0	0	0	0	0	0	0	0	0	0	0	0	0	0	0	0	0	0	0	0	0	0	0	0	0	0	0	1	0	0	0	0
Али-Байрамлы	Shirvan	0.170837	1	0	0	0	0	0	0	0	0	0	0	0	0	0	0	0	0	0	0	1	0	0	0	0	0	0	0	0	0	0	0	0	0	0	0	0	0	0	0	0	0
Куляб	Kulob	0.162024	0	0	0	0	0	0	0	0	0	0	0	0	0	0	0	0	0	0	0	0	0	0	0	0	0	0	0	0	0	0	0	0	0	0	0	1	0	0	0	0	0
Курган-Тюбе	Bokhtar	0.144379	1	0	0	0	0	0	0	0	0	0	0	0	0	0	0	0	0	0	0	0	0	0	0	0	0	0	0	0	0	0	0	0	0	0	0	1	0	0	0	0	0
Эчмиадзин	Vagharshapat	0.131335	0	0	0	0	0	0	0	0	0	0	0	0	0	0	0	0	0	0	0	0	0	0	0	0	0	0	0	0	0	0	0	0	0	0	0	0	0	1	0	0	0
Ура-Тюбе	Istaravshan	0.130802	0	0	0	0	0	0	0	0	0	0	0	0	0	0	0	0	0	0	0	0	0	0	0	0	0	0	0	0	0	0	0	0	0	0	0	1	0	0	0	0	0
Рыбница	Ribnita	0.12742	3	0	0	0	0	0	0	0	0	0	0	0	0	0	0	0	0	1	0	0	0	0	0	0	0	0	0	0	0	0	0	0	0	0	0	0	0	0	0	0	0
Кафан	Kapan	0.117731	0	0	0	0	0	0	0	0	0	0	0	0	0	0	0	0	0	0	0	0	0	0	0	0	0	0	0	0	0	0	0	0	0	0	0	0	0	1	0	0	0
	geo_allocation			Center	Mos	Center	Center	Baltic	Volga	Volga	South	Don	South	Don	Ukraine	West	Ukraine	South	Ukraine	West	South	SE	Nkaz	SE	W Urals	E Urals	W Urals	SE	W Siberia	East	East	SE	SE	NE	Ukraine	West	Ukraine	SE	SE	SE	Baltic	Baltic	Center
	SUM		2670	14	21	4	6	5	11	14	4	8	9	22	1	10	8	6	8	5	5	5	13	4	3	18	17	5	15	11	8	13	4	4	3	6	5	5	5	5	5	5	8

## Sheet: Geo_clustering_log
Iteration	Loss_func	a		NW	Mos	Mos_Bord	Cent	Est	Volga	LM_Volga	L_Vol	Rost	South	Donb	Azov	Belor	Dnipr	Crimea	C_Ukr	Mold	Georg	Azer	NKaz	SKaz	WKaz	EUral	WUral	Turkm	WSib	ESib	East	Uzb	NCau	NE	S_Ukr	W_Ukr	Slobo	Tajik	Kyrgyz	Arm	Latv	Lith	Chernoz
I	-699.2	1.3794	value	0.0335302	0.373361	-0.041833	-0.250822	1.13002	-0.444425	-0.250372	0.519822	-0.792781	0.293684	-1.15591	-0.23496	0.182706	-0.394795	0.801753	-0.179887	0.701616	0.209257	-0.429793	0.423435	-0.199835	-0.760078	-0.050321	-1.19319	0.213141	-0.822448	0.199317	0.0243842	-0.608112	-0.377608	0.921608	-0.00341264	-0.000324752	-0.308009	0.192656	-0.557883	-0.288098	0.70387	0.632462	-0.184627
			group_size	15	21	4	6	5	11	14	4	8	9	21	3	10	6	6	8	5	5	5	13	4	3	18	17	5	15	11	8	13	4	4	3	6	5	5	5	5	5	5	8
size 3
candidate	neigb	delta	loss
Azov	Donb	0.94	-702.85
	Rostov	0.53	-700.86
	Dniepr	0.118	-699.33		accepted
	Crimea	1.02	-708.33
SUkr	Mold	0.68	-704.88
	CUkr	0.124	-699.88		accepted
	Dniepr	0.36	-701.45
	Crimea	0.77	-708.82
WKaz	WUral	0.37	-700.11		accepted
	LVolg	1.35	-707.11
	NKaz	1.21	-706.25
	SKaz	0.64	-701.28
II	-700.11	1.37025	value	0.064234	0.378571	-0.023983	-0.24027	1.14095	-0.423727	-0.231657	0.538858	-0.771088	0.305619	-1.14152		0.199385	-0.351396	0.810088	-0.0969986	0.711213	0.228894	-0.405669	0.43446	-0.179136		-0.0321376	-1.15009	0.218656	-0.803168	0.213362	0.0406714	-0.58675	-0.36679	0.927813		0.0129069	-0.282312	0.207408	-0.548109	-0.270759	0.722253	0.644447	-0.165722
			group_size	15	21	4	6	5	11	14	4	8	9	21		10	9	6	11	5	5	5	13	4		18	20	5	15	11	8	13	4	4		6	5	5	5	5	5	5	8
size 4
candidate	neigb	delta	loss
Ncau	South	0.67	-703.59
	Azer	0.03	-700.12		accepted
	Georg	0.6	-702.4
	Lvol	0.91	-706.46
Mos_border	Mos	0.4	-702.34
	Center	0.22	-701.44		accepted
L_vol	Rost	1.31	-726.7
	South	0.23	-702.32		accepted
	LM Volg	0.77	-715.53
	Wural	1.69	-747.58
	Caspian	0.91	-718.2
	Chernoz	0.7	-709.48
Skaz	Nkaz	0.61	-709.94
	Uzb	0.4	-704.02
	Kyrg	0.37	-703.58		accepted
	Wural	0.98	-709.87
NE	East	0.89	-711.89
	Esib	0.71	-709.64		not accepted			Exp(delta)=0.002
																						Caspian
III	-703.58	1.38394	value	0.0172869	0.37037		-0.130206	1.12445	-0.454779	-0.259163		-0.803634	0.414399	-1.16314		0.17434	-0.379486	0.797577	-0.131626	0.696806	0.199412	-0.408777	0.417907			-0.0594391	-1.17447	0.210129	-0.832108	0.192285	0.0162361	-0.618828		0.918503		-0.00695628	-0.320865	0.185276	-0.394176	-0.296788	0.694656	0.626459	-0.191506
			group_size	15	21		10	5	11	14		8	13	21		10	9	6	11	5	5	9	13			18	20	5	15	11	8	13		4		6	5	5	9	5	5	5	8
size 5
candidate	closest
Est	Lat	0.43
Lat	Lith	0.07
Lith	Lat	0.07
Georg	Sou	0.21
Arm	Casp	0.11
Turkm	Taj	0.03
Tajik	Turkm	0.03
Mold	W_Ukr	0.7
Slobo	Dnipr	0.06
Turkm	Tajik	0.03	-703.58		accepted
	Casp	0.62	-705.66
	Uzb	0.83	-707.07
Slobo	Belarus	0.49	-708.88
	Chernoz	0.13	-704.28
	CUkr	0.19	-704.66
	Dnipr	0.06	-703.68		accepted
	Donbas	0.84	-714.88
Lith	Latvia	0.07	-703.75		accepted
	NW	0.61	-711.02
	Belarus	0.45	-707.16
Arm	Georg	0.5	-707.83
	Casp	0.11	-703.87		accepted
				NW	Mos		Cent	Est	Volga	LM_Volga		Rost	South	Donb		Belor	Dnipr	Crimea	C_Ukr	Mold	Georg	Casp	NKaz			EUral	WUral		WSib	ESib	East	Uzb		NE		W_Ukr		SE	Kyrgyz		Balt		Chernoz
IV	-703.87	1.38503	value	0.0122396	0.371977		-0.131819	1.12321	-0.457292	-0.26201		-0.806242	0.414353	-1.16488		0.172328	-0.345955	0.796573	-0.134406	0.695649	0.197045	-0.395614	0.416577			-0.0616326	-1.17643		-0.834431	0.190592	0.0142779	-0.621406		0.917757		-0.00855119		0.183503	-0.395953		0.665131		-0.193162
			group_size	15	21		10	5	11	14		8	13	21		10	14	6	11	5	5	14	13			18	20		15	11	8	13		4		6		10	9		10		8
Georg	Casp	0.59	-710.41
	South	0.22	-704.95		accepted
Est	Balt	0.46	-708.53		accepted			Exp(delta)=0.028
	NW	1.11	-725.66
Mold	W_Ukr	0.7	-712.77		accepted			Exp(delta)=0.014
	C_Ukr	0.83	-716.18
				NW	Mos	Cent	Volga	LM_Volga	Rost	South	Donb	Belor	Dnipr	Crimea	C_Ukr	Casp	NKaz	EUral	WUral	WSib	ESib	East	Uzb	NE	SW	SE	Kyrgyz	Balt	Chernoz
V	-712.77	1.3706	value	0.0630398	0.379193	-0.112074	-0.424533	-0.232386	-0.771934	0.375026	-1.14208	0.198736	-0.313447	0.809763	-0.0978973	-0.363682	0.43403	-0.0328458	-1.15073	-0.803919	0.212816	0.0400362	-0.587582	0.927571	0.224554	0.206833	-0.372624	0.803746	-0.166504
			group_size	15	21	10	11	14	8	18	21	10	14	6	11	14	13	18	20	15	11	8	13	4	11	10	9	15	8
Crimea	South	0.43	-716.22		accepted			Exp(delta)=0.032
	Dnipr	1.12	-732.95
	CUkr	0.91	-726.1
size 8
candidate	closest
Rost	Donb	0.38
Chernoz	Center	0.05
East	Esib	0.17
Chernoz	Center	0.05	-716.26		accepted
	Dnipr	0.15	-717.35
	Rost	0.6	-723.16
	South	0.6	-725.02
	LMVolg	0.07	-716.45
East	Esib	0.17	-716.86		accepted
	NE	0.89	-724.27
Rost	Donb	0.38	-717.84		accepted
	Dnipr	0.46	-721.28
	South	1.2	-747.6
	Center	0.62	-724.85
Kyrg	Nkaz	0.81	-728.97
	WUral	0.78	-724.33
	Uzb	0.21	-718.32		accepted
	SE	0.58	-720.4
				NW	Mos	Cent	Volga	LM_Volga	South	Donb	Belor	Dnipr	C_Ukr	Casp	NKaz	EUral	WUral	WSib	East	Casia	NE	SW	SE	Balt
VI	-718.32	1.36586	value	0.0801687	0.382347	-0.13383	-0.413574	-0.222542	0.446833	-1.02796	0.207382	-0.302784	-0.0859293	-0.353231	0.439748	-0.023417	-1.14231	-0.793914	0.1601	-0.503269	0.930795	0.230917	0.214499	0.811362
			group_size	15	21	18	11	14	24	29	10	14	11	14	13	18	20	15	19	22	4	11	10	15
Belor	NW	0.13	-718.84
	SW	0.02	-718.33		accepted
	Baltic	0.6	-730.48
	Center	0.34	-721.08
	CUkr	0.29	-720.68
	Dnipr	0.51	-725.74
SE	CAsia	0.71	-723.4
	Casp	0.56	-721.41		accepted			Exp(delta)=0.046
Volga	LMVol	0.19	-722.22		accepted
	Center	0.27	-724.04
	NW	0.5	-732.2
	South	0.85	-751.04
	Wural	0.74	-729.69
C_Ukr	West	0.29	-726.7
	Dnipr	0.22	-724.36		accepted			Exp(delta)=0.12
	South	0.52	-737.83
				NW	Mos	Cent	Volga	South	Donb	Dnipr	Casp	NKaz	EUral	WUral	WSib	East	Casia	NE	West	Balt
VI	-724.36	1.35827	value	0.108387	0.385288	-0.123027	-0.286388	0.460304	-1.01379	-0.195591	-0.211958	0.44888	-0.00835983	-1.12888	-0.780152	0.167668	-0.487306	0.935954	0.22856	0.823522
			group_size	15	21	18	25	24	29	25	24	13	18	20	15	19	22	4	21	15
Nkaz	WUral	1.58	-764.68
	EUral	0.46	-730.14		not accepted			Exp(delta)=0.003
	WSib	1.23	-757.27
	CAsia	0.94	-745.23
	Mistake corrected: Kaliningrad moved to West
				NW	Mos	Cent	Volga	South	Donb	Dnipr	Casp	NKaz	EUral	WUral	WSib	East	Casia	NE	West	Balt
VIa	-724.74	1.35584	value	0.124799	0.38654	-0.119272	-0.281877	0.464567	-1.01132	-0.189885	-0.211865	0.451797	-0.00355204	-1.12459	-0.779045	0.170089	-0.482211	0.937604	0.216808	0.827404
			group_size	14	21	18	25	24	29	25	24	13	18	20	15	19	22	4	22	15
NW	Cent	0.24	-727.05		accepted			Exp(delta)=0.07
	Volga	0.4	-736.19
	Balt	0.71	-748.79
	WUral	1.24	-763.23
Baltic	West	0.62	-743.72		not accepted			Exp(delta)=6e-9
	Cent	0.79	-762.53
WSib	East	0.96	-756.08
	EUral	0.77	-745.59		not accepted			Exp(delta)=8e-10
	NKaz	1.23	-760.78
EUral	WUral	1.12	-752.23
	WSib	0.77	-745.59
	Nkaz	0.47	-733.16		not accepted			Exp(delta)=0.002
East	Wsib	0.96	-756.08
	NE	0.77	-734.69		not accepted			Exp(delta)=0.0005
				Mos	Cent	Volga	South	Donb	Dnipr	Casp	NKaz	EUral	WUral	WSib	East	Casia	NE	West	Balt
VII	-727.05	1.37399	value	0.375618	0.0106538	-0.321221	0.432621	-1.04314	-0.232633	-0.238225	0.429944	-0.0395848	-1.15674	-0.811067	0.151996	-0.520422	0.92527	0.179488	0.798303
			group_size	21	32	25	24	29	25	24	13	18	20	15	19	22	4	22	15
Wural	Eural	1.12	-752.23
	Cent	1.17	-763.45
	Volga	0.84	-740.74
	Nkaz	1.59	-767.79
	South	1.59	-795.27
	Casia	0.64	-733.79		not accepted			Exp(delta)=0.001
Mos	Cent	0.37	-733.17		not accepted			Exp(delta)=0.002
Casia	Nkaz	0.95	-748.48
	Casp	0.28	-729.12		accepted			Exp(delta)=0.13
West	Dnipr	0.41	-738.79
	Center	0.17	-731.59		accepted			Exp(delta)=0.08
	Baltic	0.62	-745.79
				Mos	Cent	Volga	South	Donb	Dnipr	SE	NKaz	EUral	WUral	WSib	East	NE	Balt
VIII	-731.59	136567	value	0.380058	0.0676578	-0.303168	0.447288	-1.02761	-0.213014	-0.372143	0.439975	-0.0230431	-1.14198	-0.793517	0.160288	0.930923	0.811664
			group_size	21	54	25	24	29	25	46	13	18	20	15	19	4	15
South	SE	0.82	-776.02
	Cent	0.38	-744.05		not accepted			Exp(delta)=4e-6
	Volga	0.75	-766.95
	WUral	1.59	-797.26
	Donb	1.48	-813.58
	Dnipr	0.66	-761.53
Volga	WUral	0.84	-745.39
	Cent	0.37	-744.67		not accepted			Exp(delta)=2e-6
	South	0.75	-766.95
Dnipro	Cent	0.28	-740.3		not accepted			Exp(delta)=0.00016
	South	0.66	-761.53
	Donb	0.82	-756.96

## Sheet: Geo_confidence
	optimal	compared to		p-value	0.05_min	0.05_max	av_boost	min_boost	max_boost
a	1.37291	1	-906.77		1.335	1.414
c	1.23479
moscow	0.463	0	-741.67	5.44329e-07	0.267	0.627	1.58883	1.30604	1.87199	***
center	0.098	0	-730	0.184625	-0.047	0.228	1.10296	0.954087	1.25609
volga	-0.233	0	-734.28	0.00131596	-0.41	-0.093	0.792154	0.66365	0.911194	**
south	0.52	0	-754.78	7.84706e-13	0.384	0.66	1.68203	1.46815	1.93479	***
don	-0.956	0	-773.2	0	-1.227	-0.75	0.384428	0.293171	0.472367	***
ukraine	-0.145	0	-731.026	0.0508867	-0.285	0.006	0.865022	0.752014	1.00602
s-east	-0.301	0	-738.023	2.44611e-05	-0.445	-0.165	0.740078	0.640824	0.847894	***
n-kaz	0.517	0	-739.57	4.83895e-06	0.303	0.695	1.67699	1.35391	2.00371	***
w-ural	-1.069	0	-762.94	0	-1.388	-0.755	0.343352	0.249574	0.470011	***
e-ural	0.048	0	-729.25	0.61012	-0.143	0.214	1.04917	0.866754	1.23862
w-siberia	-0.723	0	-754.68	8.68861e-13	-0.953	-0.505	0.485294	0.385583	0.603506	***
east	0.239	0	-733.14	0.00457555	0.066	0.388	1.26998	1.06823	1.47403	**
n-east	1.012	0	-742.7	1.87294e-07	0.655	1.325	2.7511	1.92514	3.76219	***
west	0.267	0	-734.88	0.000688514	0.123	0.425	1.30604	1.13088	1.52959	***
baltics	0.886	0	-779.86	0	0.723	1.033	2.42541	2.06061	2.80948	***
center+west	0.151	0	-734.91	0.00997139	0.036	0.283	1.163	1.03666	1.32711	*
value	-729.12		-731.59

## Sheet: Geo_expectations
Contemp name	English name	Population	mentions	Region	Expected	Log Pval	Pval
Братск.	Bratsk	0.647982	23	12	4.51219	-20.5635	1.17324e-09
Череповец	Cherepovets	0.745381	18	2	4.75088	-12.1207	5.44561e-06
Ялта	Yalta	0.476549	15	4	3.92051	-10.358	3.17379e-05
Рустави	Rustavi	0.399204	13	4	3.07471	-10.0889	4.15381e-05
Севастополь	Sevastopol	0.974347	29	4	10.4666	-10.0731	4.21996e-05
Сумгаит	Sumqayit	0.543394	10	7	2.06528	-9.02007	0.000120958
Краснодар	Krasnodar	2.07133	11	4	29.4781	-8.62762	0.00017909
Набережные Челны/Брежнев	Naberezhnye Chelny	0.466101	9	3	1.79055	-8.46322	0.000211091
Тбилиси	Tbilisi	3.71208	38	4	65.6691	-8.1062	0.000301663
Нижний Тагил	Nizhny Tagil	1.59769	28	9	12.8742	-7.95618	0.000350489
Чита	Chita	0.991932	0	12	8.09518	-7.40204	0.000610007
Днепропетровск	Dnipro	3.77353	16	6	34.5549	-7.26983	0.00069623
Семипалатинск	Semey	0.957394	1	8	10.1845	-7.07683	0.000844446
Днепродзержинск	Kamianske	0.975606	15	6	5.39472	-6.92168	0.000986172
Свердловск	Yekaterinburg	4.28609	28	9	49.9001	-6.84088	0.00106916
Магнитогорск	Magnitogorsk	1.52808	25	9	12.1106	-6.46609	0.0015553
Волжский	Volzhsky	0.58997	14	4	5.25694	-6.10559	0.00223037
Кишинев	Chisinau	1.49123	28	14	14.5796	-6.07678	0.00229556
Воткинск	Votkinsk	0.311594	4	10	0.446501	-6.06464	0.00232359
Кременчуг	Kremenchuk	0.609038	9	6	2.82487	-5.26767	0.00515561
Мытищи	Mytishchi	0.499914	11	1	3.95325	-5.25876	0.00520175
Курск	Kursk	1.19601	19	2	9.0926	-5.21877	0.00541398
Новороссийск	Novorossiysk	0.594397	13	4	5.31083	-5.00707	0.00669048
Сухуми	Sokhumi	0.389177	9	4	2.96946	-4.94433	0.00712369
Армавир	Armavir	0.58311	0	4	5.17271	-4.47957	0.0113383
Березники	Berezniki	0.60594	5	10	1.11255	-4.47512	0.0113889
Дзержинск	Dzerzhinsk	1.00424	0	3	5.13608	-4.44293	0.0117614
Оренбург/Чкалов	Orenburg	1.4924	10	10	3.83521	-4.39545	0.0123333
Каунас	Kaunas	1.23402	10	15	20.8656	-4.30712	0.0134723
Гомель	Gomel	1.16904	3	14	10.4376	-4.20149	0.0149733
Петропавловск	Petropavl	0.710986	1	8	6.76906	-4.02577	0.0178497
Минск	Minsk	3.71072	72	14	50.9686	-4.02225	0.0179126
Могилев	Mogilev	0.842911	1	14	6.66185	-3.93245	0.0195956
Златоуст	Zlatoust	0.757953	0	9	4.62531	-3.93216	0.0196013
Улан-Удэ	Ulan-Ude	1.01626	2	12	8.36983	-3.88351	0.0205785
Симферополь	Simferopol	1.04587	4	4	11.5369	-3.86536	0.0209554
Владимир	Vladimir	0.961389	18	1	9.70258	-3.82964	0.0217174
Красноярск	Krasnoyarsk	2.59197	47	12	30.266	-3.82461	0.0218269
Таллин	Tallinn	1.52271	44	15	27.8468	-3.79807	0.022414
Тамбов	Tambov	0.935199	1	2	6.48673	-3.78045	0.0228124
Омск	Omsk	3.38793	30	11	16.7076	-3.77081	0.0230334
Новокуйбышевск	Novokuybyshevsk	0.381852	5	3	1.36204	-3.66459	0.0256147
Коломна	Kolomna	0.533923	10	1	4.32701	-3.6178	0.0268417
Сочи	Sochi	0.836361	16	4	8.48813	-3.5992	0.0273456
Рыбница	Ribnita	0.12742	3	14	0.497719	-3.56029	0.0284306
Казань	Kazan	3.49281	17	3	28.4352	-3.51956	0.0296125
Херсон	Kherson	1.07413	1	6	6.15629	-3.49515	0.0303442
Лиепая	Liepaja	0.379091	0	15	4.12796	-3.43481	0.0322315
Орджоникидзе/Дзауджикау	Vladikavkaz	0.96631	10	7	4.55202	-3.3061	0.0366589
Джезказган	Zhezqazghan	0.418203	8	8	3.26659	-3.28317	0.0375092
Ульяновск	Ulyanovsk	1.40297	15	3	8.12883	-3.24191	0.0390892
Кировоград	Kropyvnytskyi	0.769808	0	6	3.89678	-3.20363	0.0406145
Электросталь	Elektrostal	0.501635	9	1	3.97172	-3.19255	0.041067
Черновцы	Chernivtsi	0.76216	1	14	5.80215	-3.19177	0.0410991
Коркино	Korkino	0.341238	5	9	1.54601	-3.17845	0.0416502
Абакан	Abakan	0.377543	6	12	2.14894	-3.0985	0.0451168
Архангельск	Arkhangelsk	1.44449	5	2	11.7828	-3.06654	0.0465821
Тарту	Tartu	0.376215	9	15	4.08467	-3.03688	0.0479844
Душанбе/Сталинабад	Dushanbe	1.51076	15	7	8.4077	-2.98472	0.0505537
Благовещенск	Blagoveshchensk	0.546168	0	12	3.5685	-2.87536	0.0563958
Одесса	Odesa	3.67364	48	6	33.3052	-2.80661	0.0604094
Уссурийск	Ussuriysk	0.530024	0	12	3.424	-2.73086	0.0651632
Ногинск	Noginsk	0.444962	0	1	3.3697	-2.67655	0.0688001
Джамбул	Taraz	0.774531	0	7	3.35955	-2.6664	0.069502
Северодвинск	Severodvinsk	0.575908	0	2	3.33389	-2.64074	0.0713085
Киев	Kyiv	6.73984	95	6	76.6209	-2.49641	0.0823802
Иркутск	Irkutsk	1.90514	12	12	19.8324	-2.47535	0.0841335
Уфа	Ufa	3.16881	5	10	10.783	-2.46085	0.0853624
Наманган	Namangan	0.727422	0	7	3.08228	-2.38913	0.0917094
Таганрог	Taganrog	1.02461	6	5	2.56408	-2.37646	0.0928788
Черемхово	Cheremkhovo	0.485632	0	12	3.03646	-2.34332	0.0960084
Кутаиси	Kutaisi	0.676242	2	4	6.3398	-2.33478	0.0968318
Подольск	Podolsk	0.695864	2	1	6.22573	-2.25146	0.105245
Балаково	Balakovo	0.393629	4	3	1.41966	-2.18985	0.111934
Рыбинск/Андропов	Rybinsk	0.894459	2	2	6.10233	-2.16185	0.115112
Кохтла-Ярве	Kohtla-Jarve	0.289557	0	15	2.85212	-2.15897	0.115444
Ковров	Kovrov	0.509066	0	2	2.81476	-2.12161	0.119839
Клин	Klin	0.312999	5	1	2.0787	-2.11972	0.120065
Находка	Nakhodka	0.456417	6	12	2.78863	-2.0538	0.128247
Загорск	Sergiyev Posad	0.381177	0	1	2.72473	-2.03158	0.131128
Ашхабад	Ashgabat	1.0312	9	7	4.97694	-2.01592	0.133198
Астрахань	Astrakhan	1.62448	14	4	21.1167	-1.99007	0.136686
Самарканд	Samarkand	1.35678	3	7	7.25395	-1.974	0.1389
Даугавпилс	Daugavpils	0.390175	1	15	4.29435	-1.93456	0.144488
Ленинград	St Petersburg	15.9477	339	2	318.533	-1.88251	0.152208
Рудный	Rudny	0.351107	0	8	2.56932	-1.87618	0.153174
Караганда	Qaragandy	2.08277	41	8	29.6052	-1.87478	0.153389
Горловка	Horlivka	1.47035	1	5	4.21031	-1.86652	0.154661
Новгород	Veliky Novgorod	0.524738	6	2	2.93384	-1.86568	0.154791
Люберцы	Lyubertsy	0.544031	8	1	4.43978	-1.81143	0.16342
Феодосия	Feodosia	0.343605	0	4	2.50252	-1.80937	0.163757
Каменск-Уральский	Kamensk-Uralsky	0.696868	1	9	4.12128	-1.79472	0.166174
Бобруйск	Babruysk	0.589801	1	14	4.08035	-1.76182	0.171732
Бельцы	Balti	0.406094	0	14	2.44449	-1.75135	0.17354
Белгород	Belgorod	0.629073	7	2	3.76386	-1.74244	0.175093
Мелитополь	Melitopol	0.544186	0	6	2.42059	-1.72744	0.177739
Луцк	Lutsk	0.401335	0	14	2.40491	-1.71177	0.180546
Лениногорск	Ridder	0.331696	0	8	2.37645	-1.6833	0.18576
Кемерово	Kemerovo	1.75498	3	11	6.77235	-1.66673	0.188864
Артем	Artyom	0.400287	0	12	2.32912	-1.63597	0.194763
Мичуринск	Michurinsk	0.441724	0	2	2.31615	-1.623	0.197306
Кривой Рог	Kryvyi Rih	2.42574	25	6	18.8383	-1.61202	0.199484
Александров	Aleksandrov	0.336036	0	1	2.29123	-1.59809	0.202283
Рязань	Ryazan	1.41416	11	1	16.4814	-1.56198	0.20972
Канск	Kansk	0.390406	0	12	2.2504	-1.55725	0.210715
Чимкент	Shymkent	0.994254	8	7	4.73408	-1.54075	0.21422
Баку	Baku	5.27401	38	7	46.7811	-1.51008	0.220892
Ворошиловград/Луганск	Luhansk	1.61074	8	5	4.77147	-1.50854	0.221233
Муром	Murom	0.425637	0	2	2.20104	-1.50789	0.221377
Иваново	Ivanovo	1.70448	20	2	14.7887	-1.48426	0.22667
Тула	Tula	2.00426	20	1	26.6025	-1.4682	0.23034
Бухара	Bukhara	0.499684	4	7	1.84078	-1.46665	0.230697
Гродно	Grodno	0.546837	1	14	3.67758	-1.44165	0.236537
Елец	Elets	0.405419	0	2	2.0589	-1.36575	0.255189
Узловая	Uzlovaya	0.403009	0	2	2.04218	-1.34903	0.259492
Махачкала	Makhachkala	0.804242	1	7	3.53768	-1.33211	0.26392
Кинешма	Kineshma	0.399922	0	2	2.02078	-1.32764	0.265102
Борисов	Barysaw	0.35253	0	14	2.01276	-1.31961	0.26724
Хмельницкий	Khmelnytskyi	0.473997	0	6	2.00251	-1.30936	0.269993
Воркута	Vorkuta	0.778287	8	2	5.04111	-1.28952	0.275403
Барнаул	Barnaul	1.8668	4	11	7.3716	-1.26084	0.283416
Пермь/Молотов	Perm	3.4688	8	10	12.2088	-1.26009	0.283628
Мурманск	Murmansk	1.26412	6	2	9.81085	-1.25508	0.285053
Краснодон	Sorokyne	0.384303	2	5	0.667168	-1.24149	0.288953
Харьков	Kharkiv	5.01365	43	6	51.0427	-1.24001	0.289381
Белая Церковь	Bila Tserkva	0.454884	0	6	1.89256	-1.19942	0.301369
Серов	Serov	0.424147	4	9	2.08398	-1.14986	0.316681
Новокузнецк/Сталинск	Novokuznetsk	2.03914	5	11	8.32146	-1.11761	0.327061
Калининград МО	Korolyov	0.432433	1	1	3.23941	-1.10184	0.332259
Липецк	Lipetsk	1.23288	6	2	9.47994	-1.09969	0.332974
Пярну	Parnu	0.205494	0	15	1.78084	-1.08769	0.336994
Усолье-Сибирское	Usolye-Sibirskoye	0.328078	0	12	1.77256	-1.07941	0.339796
Челябинск	Chelyabinsk	3.65653	49	9	40.1214	-1.05093	0.349612
Стаханов/Кадиевка	Kadiivka	0.771286	0	5	1.73624	-1.0431	0.352361
Сызрань	Syzran	0.702934	1	3	3.14726	-1.03166	0.356415
Якутск	Yakutsk	0.504213	4	13	6.92541	-1.02218	0.35981
Запорожье	Zaporizhzhia	2.59401	16	6	20.6556	-1.01327	0.36303
Кзыл-Орда	Kyzylorda	0.472519	0	7	1.70463	-1.01148	0.36368
Ростов-на-Дону	Rostov-on-Don	3.23283	16	5	12.4177	-0.981561	0.374726
Алма- Ата	Almaty	2.89904	25	7	20.5714	-0.965477	0.380802
Лисичанск	Lysychansk	0.438921	2	5	0.800655	-0.960017	0.382886
Черкассы	Cherkasy	0.644053	1	6	3.05077	-0.958717	0.383384
Саратов	Saratov	3.06503	19	3	23.7658	-0.95331	0.385463
Великие Луки	Velikiye Luki	0.340782	0	2	1.6222	-0.929053	0.394928
Вильнюс	Vilnius	1.50172	35	15	27.3209	-0.908146	0.403271
Псков	Pskov	0.527955	1	2	2.9592	-0.890014	0.41065
Белово	Belovo	0.608176	0	11	1.58084	-0.887696	0.411603
Бердянск	Berdyansk	0.39754	0	6	1.57263	-0.879487	0.414996
Воронеж	Voronezh	2.70243	23	2	27.8432	-0.877087	0.415993
Ташкент	Tashkent	5.63499	45	7	51.2326	-0.848838	0.427912
Новотроицк	Novotroitsk	0.338802	0	9	1.5311	-0.837948	0.432597
Пенза	Penza	1.53727	12	3	9.21581	-0.828203	0.436834
Пятигорск	Pyatigorsk	0.487215	6	4	4.04188	-0.814417	0.442897
Чарджоу	Turkmenabat	0.459308	3	7	1.63959	-0.790001	0.453844
Новочеркасск	Novocherkassk	0.684682	0	5	1.47435	-0.781201	0.457856
Шяуляй	Siauliai	0.374009	2	15	4.05191	-0.773944	0.461191
Орехово-Зуево	Orekhovo-Zuyevo	0.506797	2	1	4.02836	-0.759383	0.467955
Чирчик	Circhik	0.420279	0	7	1.45154	-0.758391	0.46842
Павлодар	Pavlodar	0.773482	10	8	7.59913	-0.754822	0.470094
Норильск	Norilsk	0.715119	14	13	11.1893	-0.748536	0.473059
Петрозаводск	Petrozavodsk	0.794396	3	2	5.18483	-0.733833	0.480065
Кировакан	Vanadzor	0.411661	0	7	1.41092	-0.717771	0.487838
Кушва	Kushva	0.318774	0	9	1.40839	-0.715244	0.489073
Ленинакан	Gyumri	0.663374	1	7	2.71619	-0.71034	0.491477
Брест	Brest	0.510666	5	14	3.3484	-0.708158	0.492551
Волгоград/Сталинград	Volgograd	3.28459	62	4	55.5148	-0.705851	0.493688
Витебск	Vitebsk	0.937555	10	14	7.71045	-0.700528	0.496323
Стерлитамак	Sterlitamak	0.713031	0	10	1.39121	-0.698067	0.497546
Батуми	Batumi	0.426348	5	4	3.36485	-0.69592	0.498616
Ереван	Yerevan	3.17933	27	7	23.3504	-0.689739	0.501707
Тольятти/Ставрополь-на-Волге	Tolyatti	1.12001	8	3	5.96628	-0.687597	0.502783
Донецк/Сталино	Donetsk	3.73339	12	5	15.1316	-0.666102	0.513707
Прокопьевск	Prokopyevsk	1.16711	2	11	3.86816	-0.661397	0.51613
Новосибирск	Novosibirsk	4.75082	33	11	26.5769	-0.639949	0.527319
Калининград	Kaliningrad	1.18569	8	14	10.6428	-0.633945	0.530495
Копейск	Kopeysk	0.656951	2	9	3.80083	-0.620779	0.537526
Николаев	Mykolaiv	1.39213	11	6	8.78907	-0.618733	0.538626
Коммунарск/Ворошиловск	Alchevsk	0.529101	2	5	1.03487	-0.590348	0.554134
Клайпеда	Klaipeda	0.564528	5	15	7.13057	-0.564421	0.568689
Курган-Тюбе	Bokhtar	0.144379	1	7	0.334822	-0.563754	0.569069
Чапаевск	Chapayevsk	0.359245	0	3	1.25214	-0.558995	0.571783
Алмалык	Almalyk	0.335713	2	7	1.0662	-0.54964	0.577158
Рига	Riga	2.99828	73	15	70.5938	-0.540177	0.582645
Камышин	Kamyshin	0.366196	4	4	2.73123	-0.5351	0.585611
Александрия	Oleksandriia	0.327601	0	6	1.20591	-0.512759	0.598841
Калуга	Kaluga	0.842167	6	1	8.09022	-0.502596	0.604958
Чебоксары	Cheboksary	0.916844	6	3	4.53251	-0.502085	0.605267
Актюбинск	Aktobe	0.603431	2	10	1.10626	-0.500016	0.606521
Темиртау	Temirtau	0.638845	4	8	5.84362	-0.489282	0.613066
Майкоп	Maykop	0.445667	2	4	3.57685	-0.488193	0.613734
Орск	Orsk	0.908779	3	10	1.94108	-0.486522	0.614761
Жданов/Мариуполь	Mariupol	1.73709	14	6	11.9111	-0.480882	0.618238
Павлоград	Pavlohrad	0.320211	0	6	1.16867	-0.47552	0.621562
Орша	Orsha	0.399015	1	14	2.38601	-0.473212	0.622998
Барановичи	Baranavichy	0.398777	1	14	2.38437	-0.472055	0.623719
Химки	Khimki	0.345829	1	1	2.38348	-0.471425	0.624112
Калинин	Tver	1.4204	14	1	16.5807	-0.460191	0.631163
Балашов	Balashov	0.335692	0	3	1.14102	-0.447873	0.638986
Кокчетав	Kokshetau	0.329011	1	8	2.34993	-0.447844	0.639004
Альметьевск	Almetyevsk	0.340795	2	3	1.16489	-0.431872	0.649292
Керчь	Kerch	0.53309	3	4	4.57368	-0.41546	0.660037
Южно-Сахалинск	Yuzhno-Sakhalinsk	0.470469	4	12	2.90759	-0.409249	0.664149
Житомир	Zhytomyr	0.700497	2	6	3.42341	-0.399742	0.670493
Винница	Vinnytsia	0.886194	6	6	4.72785	-0.396284	0.672816
Уральск	Oral	0.594361	0	10	1.08356	-0.390418	0.676774
Паневежис	Panevezys	0.295835	4	15	2.93628	-0.390096	0.676992
Али-Байрамлы	Shirvan	0.170837	1	7	0.421625	-0.373908	0.68804
Смоленск	Smolensk	0.954024	5	2	6.66642	-0.370138	0.690639
Шахты	Shakhty	0.926264	1	5	2.23252	-0.366109	0.693427
Усть-Каменогорск	Oskemen	0.906518	11	8	9.44859	-0.361454	0.696663
Орел	Oryol	0.949966	5	2	6.62808	-0.354675	0.701401
Осинники	Osinniki	0.446044	0	11	1.03263	-0.33948	0.712141
Петропавловск-Камчатский	Petropavlovsk-Kamchatsky	0.649072	8	13	9.79636	-0.33909	0.712418
Зеленодольск	Zelenodolsk	0.310133	0	3	1.02333	-0.330182	0.718793
Хабаровск	Khabarovsk	1.78771	16	12	18.174	-0.32901	0.719636
Ачинск	Achinsk	0.379448	1	12	2.16381	-0.318884	0.72696
Андижан	Andijan	0.760653	2	7	3.27764	-0.31763	0.727872
Вольск	Volsk	0.305494	0	3	1.00255	-0.309399	0.733888
Сыктывкар	Syktyvkar	0.543435	4	2	3.07857	-0.300117	0.740732
Магадан	Magadan	0.394077	6	13	4.93799	-0.2926	0.746321
Кострома	Kostroma	0.933303	5	2	6.46864	-0.29138	0.747232
Бугульма	Bugulma	0.299578	0	3	0.97606	-0.282913	0.753585
Горький	Nizhny Novgorod	4.84021	45	3	44.5022	-0.282895	0.753599
Томск	Tomsk	1.39892	6	11	4.96046	-0.282092	0.754204
Курган	Kurgan	0.962959	5	9	6.42486	-0.274284	0.760116
Никополь	Nikopol	0.490029	1	6	2.09589	-0.272666	0.761347
Комсомольск-на-Амуре	Komsomolsk-on-Amur	0.935398	6	12	7.46893	-0.268099	0.764832
Коканд	Kokand	0.545631	1	7	2.07682	-0.259776	0.771224
Первоуральск	Pervouralsk	0.574625	2	9	3.1621	-0.25394	0.775738
Владивосток	Vladivostok	1.80706	20	12	18.4453	-0.251057	0.777978
Тернополь	Ternopil	0.382815	3	14	2.25403	-0.244023	0.78347
Тюмень	Tyumen	1.06663	6	9	7.39241	-0.240748	0.78604
Ургенч	Urgench	0.302074	0	7	0.92245	-0.229303	0.795088
Щелково	Shchyolkovo	0.334549	3	1	2.2772	-0.228391	0.795813
Миасс	Miass	0.567141	2	9	3.10558	-0.22325	0.799915
Ровно	Rivne	0.482069	2	14	3.09368	-0.216833	0.805064
Ставрополь	Stavropol	0.826928	7	4	8.35605	-0.212058	0.808918
Куйбышев	Samara	4.29067	39	3	37.7164	-0.207827	0.812348
Новошахтинск	Novoshakhtinsk	0.477744	0	5	0.899402	-0.206255	0.813626
Чистяково/Торез	Chystiakove	0.473421	0	5	0.888306	-0.195158	0.822705
Маргилан	Margilan	0.412156	2	7	1.41327	-0.191789	0.825481
Фрунзе	Bishkek	1.62892	8	7	9.32296	-0.188922	0.827851
Ленинск-Кузнецкий	Leninsk-Kuznetsky	0.713479	1	11	1.96832	-0.187178	0.829296
Каменск-Шахтинский	Kamensk-Shakhtinsky	0.335227	1	5	0.553008	-0.16303	0.849566
Кировабад	Ganja	0.778662	4	7	3.38459	-0.131771	0.876542
Сарапул	Sarapul	0.379159	1	10	0.584643	-0.121727	0.88539
Юрмала	Jurmala	0.212335	1	15	1.86223	-0.117484	0.889155
Ухта	Ukhta	0.324138	2	2	1.5142	-0.112241	0.893829
Соликамск	Solikamsk	0.383116	1	10	0.592914	-0.111411	0.894571
Новомосковск/Сталиногорск	Novomoskovsk	0.543517	5	1	4.43418	-0.0935209	0.910719
Константиновка	Kostyantynivka	0.429505	0	5	0.777207	-0.0840597	0.919376
Красноармейск Донец	Pokrovsk	0.428796	0	5	0.775468	-0.0823212	0.920976
Асбест	Asbest	0.380055	1	9	1.79302	-0.0727482	0.929835
Ярославль	Yaroslavl	2.12201	19	2	19.9783	-0.0572434	0.944364
Ош	Osh	0.485194	1	7	1.76785	-0.0566296	0.944944
Ревда	Revda	0.348812	2	9	1.59348	-0.0555978	0.94592
Междуреченск	Mezhdurechensk	0.315848	1	11	0.642857	-0.0529537	0.948424
Троицк	Troitsk	0.350981	2	9	1.60729	-0.0462079	0.954843
Балашиха	Balashikha	0.369206	3	1	2.60766	-0.0335721	0.966985
Ташауз	Dashoguz	0.253949	0	7	0.726617	-0.0334693	0.967085
Ивано-Франковск/Станислав	Ivano-Frankivsk	0.44129	2	14	2.74001	-0.0327814	0.96775
Полтава	Poltava	0.88638	4	6	4.72932	-0.0218391	0.978398
Ижевск/Устинов	Izhevsk	1.73579	4	10	4.71923	-0.0180471	0.982115
Харцызск	Khartsyzk	0.399887	0	5	0.704605	-0.0114578	0.988608
Йошкар-Ола	Yoshkar-Ola	0.626785	2	3	2.68912	-0.00744266	0.992585
Салават	Salavat	0.428496	0	10	0.691461	0.00168643	1.00169
Энгельс	Engels	0.62025	2	3	2.65091	0.0113842	1.01145
Свердловск (Луганск обл)	Dovzhansk	0.390215	0	5	0.681295	0.0118524	1.01192
Брянск	Bryansk	1.35022	11	2	10.7398	0.0172562	1.01741
Саранск	Saransk	0.775272	3	3	3.60069	0.0296946	1.03014
Целиноград/Акмолинск	Astana	0.713046	7	8	6.79587	0.0381667	1.0389
Гурьев	Atyrau	0.448828	1	10	0.736827	0.0418516	1.04274
Кизел	Kizel	0.408424	0	10	0.647324	0.045823	1.04689
Бендеры	Bender	0.297371	1	14	1.59385	0.0524423	1.05384
Тирасполь	Tiraspol	0.446761	3	14	2.787	0.0534309	1.05488
Краматорск	Kramatorsk	0.781562	2	5	1.76815	0.0537697	1.05524
Первомайск (Луганск обл)	Pervomaisk	0.372038	0	5	0.638028	0.0551189	1.05667
Енакиево	Yenakijeve	0.717259	1	5	1.57157	0.066095	1.06833
Львов	Lviv	2.3463	27	14	27.1642	0.0734775	1.07624
Кисловодск	Kislovodsk	0.376392	3	4	2.83622	0.0753565	1.07827
Мары	Mary	0.267225	1	7	0.779377	0.0793809	1.08262
Нальчик	Nalchik	0.624015	2	7	2.4972	0.0853193	1.08906
Балхаш	Balkhash	0.380852	3	8	2.87337	0.091395	1.0957
Киров	Kirov	1.38763	8	3	8.00658	0.0915894	1.09591
Ленинабад	Khujand	0.431778	1	7	1.50634	0.10563	1.11141
Кустанай	Kostanay	0.517435	4	8	4.37531	0.106021	1.11185
Гуково	Gukovo	0.341924	0	5	0.56824	0.124907	1.13304
Рубцовск	Rubtsovsk	0.577424	1	11	1.47198	0.126184	1.13449
Грозный	Grozny	1.34976	7	7	7.20262	0.128484	1.1371
Артемовск	Bakhmut	0.457868	1	5	0.848621	0.134522	1.14399
Батайск	Bataysk	0.336267	0	5	0.555501	0.137646	1.14757
Макеевка	Makiivka	1.94069	6	5	6.16282	0.148603	1.16021
Ангарск	Angarsk	0.813186	6	12	6.16291	0.148627	1.16024
Елгава	Jelgava	0.220268	2	15	1.95925	0.153324	1.1657
Вологда	Vologda	0.791935	5	2	5.16244	0.161237	1.17496
Сумы	Sumy	0.676216	3	6	3.26156	0.163553	1.17769
Дзержинск (Донецк обла)	Toretsk	0.320584	0	5	0.52021	0.172937	1.18879
Киселевск	Kiselevsk	0.55385	1	11	1.39036	0.174229	1.19033
Серпухов	Serpukhov	0.518917	4	1	4.16099	0.177866	1.19467
Белорецк	Beloretsk	0.345717	0	10	0.514923	0.178224	1.19509
Чернигов	Chernihiv	0.665541	3	6	3.19079	0.189912	1.20914
Евпатория	Yevpatoriya	0.319165	2	4	2.26182	0.192582	1.21238
Котлас	Kotlas	0.403795	2	2	2.04775	0.193532	1.21353
Нарва	Narva	0.244107	2	15	2.25557	0.195326	1.21571
Пржевальск	Karakol	0.191416	0	7	0.492972	0.200176	1.22162
Губаха	Gubakha	0.332399	0	10	0.487922	0.205225	1.2278
Небит-Даг	Balkanabat	0.311741	1	7	0.962931	0.212249	1.23646
Шахтерск	Shakhtarsk	0.302575	0	5	0.480537	0.212611	1.2369
Фергана	Fergana	0.548626	2	7	2.09251	0.212618	1.23691
Невинномысск	Nevinnomyssk	0.312748	2	4	2.19883	0.219984	1.24606
Бийск	Biysk	0.771804	2	11	2.19244	0.222732	1.24949
Октябрьский	Oktyabrsky	0.321522	0	10	0.466091	0.227056	1.2549
Лысьва	Lysva	0.319267	0	10	0.461718	0.231429	1.2604
Джалал-Абад	Jalal-Abad	0.181347	0	7	0.457613	0.235534	1.26558
Шеки/Нуха	Sheki	0.178937	0	7	0.449455	0.243693	1.27595
Токмак	Tokmok	0.178866	0	7	0.449213	0.243934	1.27626
Красный Луч	Khrustalnyi	0.613167	1	5	1.26719	0.2445	1.27698
Кунгур	Kungur	0.308078	0	10	0.43963	0.253517	1.28855
Ангрен	Angren	0.328767	1	7	1.03619	0.254946	1.29039
Нукус	Nukus	0.33642	1	7	1.06921	0.272652	1.31344
Кузнецк	Kuznetsk	0.325869	1	3	1.09558	0.286165	1.33131
Димитровград/Мелекесс	Dimitrovgrad	0.327867	1	3	1.10483	0.290774	1.33746
Анжеро-Судженск	Anzhero-Sudzhensk	0.47356	1	11	1.12136	0.298864	1.34833
Славянск	Slovyansk	0.562066	1	5	1.1245	0.30038	1.35037
Куляб	Kulob	0.162024	0	7	0.392091	0.301056	1.35129
Эчмиадзин	Vagharshapat	0.131335	0	7	0.293839	0.399308	1.49079
Ура-Тюбе	Istaravshan	0.130802	0	7	0.292304	0.400843	1.49308
Кафан	Kapan	0.117731	0	7	0.252879	0.440268	1.55312

## Sheet: Specialization_variables
Contemp name	English name	Population	mentions	Rep_Capit	Oblast	Аut_Rus_Cap	Autonom	Aut_nonRus_cap	Black_sea	Balt	Azov	Kaspian	North	Pacific	Recr	Hydro_big (>2000)	Hydro_med (500-2000)	Steelwork	Automob	Coal	non-ferr	Studio
Челябинск	Chelyabinsk	3.65653	49	0	1	0	0	0	0	0	0	0	0	0	0	0	0	1	0	0	1	0	2
Новокузнецк/Сталинск	Novokuznetsk	2.03914	5	0	0	0	0	0	0	0	0	0	0	0	0	0	0	1	0	1	0	0	2
Макеевка	Makiivka	1.94069	6	0	0	0	0	0	0	0	0	0	0	0	0	0	0	1	0	1	0	0	2
Нижний Тагил	Nizhny Tagil	1.59769	28	0	0	0	0	0	0	0	0	0	0	0	0	0	0	1	0	0	1	0	2
Рига	Riga	2.99828	73	1	0	0	0	0	0	1	0	0	0	0	0	0	0	0	1	0	0	1	2
Таллин	Tallinn	1.52271	44	1	0	0	0	0	0	1	0	0	0	0	0	0	0	0	0	0	0	1	2
Орджоникидзе/Дзауджикау	Vladikavkaz	0.96631	10	0	0	1	0	0	0	0	0	0	0	0	0	0	0	0	0	0	1	1	2
Белово	Belovo	0.608176	0	0	0	0	0	0	0	0	0	0	0	0	0	0	0	0	0	1	1	0	2
Запорожье	Zaporizhzhia	2.59401	16	0	1	0	0	0	0	0	0	0	0	0	0	0	1	1	1	0	0	0	1
Кривой Рог	Kryvyi Rih	2.42574	25	0	0	0	0	0	0	0	0	0	0	0	0	0	0	1	0	0	0	0	1
Жданов/Мариуполь	Mariupol	1.73709	14	0	0	0	0	0	0	0	1	0	0	0	0	0	0	1	0	0	0	0	1
Магнитогорск	Magnitogorsk	1.52808	25	0	0	0	0	0	0	0	0	0	0	0	0	0	0	1	0	0	0	0	1
Липецк	Lipetsk	1.23288	6	0	1	0	0	0	0	0	0	0	0	0	0	0	0	1	0	0	0	0	1
Днепродзержинск	Kamianske	0.975606	15	0	0	0	0	0	0	0	0	0	0	0	0	0	0	1	0	0	0	0	1
Краматорск	Kramatorsk	0.781562	2	0	0	0	0	0	0	0	0	0	0	0	0	0	0	1	0	0	0	0	1
Череповец	Cherepovets	0.745381	18	0	0	0	0	0	0	0	0	0	0	0	0	0	0	1	0	0	0	0	1
Темиртау	Temirtau	0.638845	4	0	0	0	0	0	0	0	0	0	0	0	0	0	0	1	0	0	0	0	1
Коммунарск/Ворошиловск	Alchevsk	0.529101	2	0	0	0	0	0	0	0	0	0	0	0	0	0	0	1	0	0	0	0	1
Серов	Serov	0.424147	4	0	0	0	0	0	0	0	0	0	0	0	0	0	0	1	0	0	0	0	1
xxx	Rustavi	0.399204	13	0	0	0	0	0	0	0	0	0	0	0	0	0	0	1	0	0	0	0	1
Белорецк	Beloretsk	0.345717	0	0	0	0	1	0	0	0	0	0	0	0	0	0	0	1	0	0	0	0	1
Новотроицк	Novotroitsk	0.338802	0	0	0	0	0	0	0	0	0	0	0	0	0	0	0	1	0	0	0	0	1
Ленинград	St Petersburg	15.9477	339	0	1	0	0	0	0	1	0	0	0	0	0	0	0	0	0	0	0	1	1
Киев	Kyiv	6.73984	95	1	1	0	0	0	0	0	0	0	0	0	0	0	0	0	0	0	0	1	1
Ташкент	Tashkent	5.63499	45	1	1	0	0	0	0	0	0	0	0	0	0	0	0	0	0	0	0	1	1
Баку	Baku	5.27401	38	1	0	0	0	0	0	0	0	1	0	0	0	0	0	0	0	0	0	0	1
Куйбышев	Samara	4.29067	39	0	1	0	0	0	0	0	0	0	0	0	0	1	0	0	0	0	0	1	1
Донецк/Сталино	Donetsk	3.73339	12	0	1	0	0	0	0	0	0	0	0	0	0	0	0	0	0	1	0	0	1
Тбилиси	Tbilisi	3.71208	38	1	0	0	0	0	0	0	0	0	0	0	0	0	0	0	0	0	0	1	1
Минск	Minsk	3.71072	72	1	1	0	0	0	0	0	0	0	0	0	0	0	0	0	1	0	0	1	1
Одесса	Odesa	3.67364	48	0	1	0	0	0	1	0	0	0	0	0	0	0	0	0	0	0	0	0	1
Казань	Kazan	3.49281	17	0	0	1	0	0	0	0	0	0	0	0	0	0	0	0	0	0	0	1	1
Волгоград/Сталинград	Volgograd	3.28459	62	0	1	0	0	0	0	0	0	0	0	0	0	1	0	0	0	0	0	0	1
Ереван	Yerevan	3.17933	27	1	0	0	0	0	0	0	0	0	0	0	0	0	0	0	0	0	0	1	1
Уфа	Ufa	3.16881	5	0	0	1	0	0	0	0	0	0	0	0	0	0	0	0	0	0	0	1	1
Алма- Ата	Almaty	2.89904	25	1	1	0	0	0	0	0	0	0	0	0	0	0	0	0	0	0	0	1	1
Красноярск	Krasnoyarsk	2.59197	47	0	1	0	0	0	0	0	0	0	0	0	0	1	0	0	0	0	0	0	1
Караганда	Qaragandy	2.08277	41	0	1	0	0	0	0	0	0	0	0	0	0	0	0	0	0	1	0	0	1
Владивосток	Vladivostok	1.80706	20	0	1	0	0	0	0	0	0	0	0	1	0	0	0	0	0	0	0	1	1
Кемерово	Kemerovo	1.75498	3	0	1	0	0	0	0	0	0	0	0	0	0	0	0	0	0	1	0	0	1
Ижевск/Устинов	Izhevsk	1.73579	4	0	0	1	0	0	0	0	0	0	0	0	0	0	0	0	1	0	0	0	1
Фрунзе	Bishkek	1.62892	8	1	0	0	0	0	0	0	0	0	0	0	0	0	0	0	0	0	0	1	1
Душанбе/Сталинабад	Dushanbe	1.51076	15	1	0	0	0	0	0	0	0	0	0	0	0	0	0	0	0	0	0	1	1
Вильнюс	Vilnius	1.50172	35	1	0	0	0	0	0	0	0	0	0	0	0	0	0	0	0	0	0	1	1
Кишинев	Chisinau	1.49123	28	1	0	0	0	0	0	0	0	0	0	0	0	0	0	0	0	0	0	1	1
Горловка	Horlivka	1.47035	1	0	0	0	0	0	0	0	0	0	0	0	0	0	0	0	0	1	0	0	1
Николаев	Mykolaiv	1.39213	11	0	1	0	0	0	1	0	0	0	0	0	0	0	0	0	0	0	0	0	1
Грозный	Grozny	1.34976	7	0	0	1	0	0	0	0	0	0	0	0	0	0	0	0	0	0	0	0	1
Калининград	Kaliningrad	1.18569	8	0	1	0	0	0	0	1	0	0	0	0	0	0	0	0	0	0	0	0	1
Прокопьевск	Prokopyevsk	1.16711	2	0	0	0	0	0	0	0	0	0	0	0	0	0	0	0	0	1	0	0	1
Херсон	Kherson	1.07413	1	0	1	0	0	0	1	0	0	0	0	0	0	0	0	0	0	0	0	0	1
Ашхабад	Ashgabat	1.0312	9	1	0	0	0	0	0	0	0	0	0	0	0	0	0	0	0	0	0	1	1
Улан-Удэ	Ulan-Ude	1.01626	2	0	0	1	0	0	0	0	0	0	0	0	0	0	0	0	0	0	0	0	1
Чимкент	Shymkent	0.994254	8	0	1	0	0	0	0	0	0	0	0	0	0	0	0	0	0	0	1	0	1
Севастополь	Sevastopol	0.974347	29	0	0	0	0	0	1	0	0	0	0	0	0	0	0	0	0	0	0	0	1
Шахты	Shakhty	0.926264	1	0	0	0	0	0	0	0	0	0	0	0	0	0	0	0	0	1	0	0	1
Чебоксары	Cheboksary	0.916844	6	0	0	1	0	0	0	0	0	0	0	0	0	0	1	0	0	0	0	0	1
Орск	Orsk	0.908779	3	0	0	0	0	0	0	0	0	0	0	0	0	0	0	0	0	0	1	0	1
Усть-Каменогорск	Oskemen	0.906518	11	0	1	0	0	0	0	0	0	0	0	0	0	0	0	0	0	0	1	0	1
Сочи	Sochi	0.836361	16	0	0	0	0	0	1	0	0	0	0	0	1	0	0	0	0	0	0	0	1
Махачкала	Makhachkala	0.804242	1	0	0	1	0	0	0	0	0	1	0	0	0	0	0	0	0	0	0	0	1
Петрозаводск	Petrozavodsk	0.794396	3	0	0	1	0	0	0	0	0	0	0	0	0	0	0	0	0	0	0	0	1
Воркута	Vorkuta	0.778287	8	0	0	0	1	0	0	0	0	0	0	0	0	0	0	0	0	1	0	0	1
Саранск	Saransk	0.775272	3	0	0	1	0	0	0	0	0	0	0	0	0	0	0	0	0	0	0	0	1
Стаханов/Кадиевка	Kadiivka	0.771286	0	0	0	0	0	0	0	0	0	0	0	0	0	0	0	0	0	1	0	0	1
Енакиево	Yenakijeve	0.717259	1	0	0	0	0	0	0	0	0	0	0	0	0	0	0	0	0	1	0	0	1
Норильск	Norilsk	0.715119	14	0	0	0	0	0	0	0	0	0	0	0	0	0	0	0	0	0	1	0	1
Ленинск-Кузнецкий	Leninsk-Kuznetsky	0.713479	1	0	0	0	0	0	0	0	0	0	0	0	0	0	0	0	0	1	0	0	1
Петропавловск-Камчатский	Petropavlovsk-Kamchatsky	0.649072	8	0	1	0	0	0	0	0	0	0	0	1	0	0	0	0	0	0	0	0	1
Братск	Bratsk	0.647982	23	0	0	0	0	0	0	0	0	0	0	0	0	1	0	0	0	0	0	0	1
Йошкар-Ола	Yoshkar-Ola	0.626785	2	0	0	1	0	0	0	0	0	0	0	0	0	0	0	0	0	0	0	0	1
Нальчик	Nalchik	0.624015	2	0	0	1	0	0	0	0	0	0	0	0	0	0	0	0	0	0	0	0	1
Красный Луч	Khrustalnyi	0.613167	1	0	0	0	0	0	0	0	0	0	0	0	0	0	0	0	0	1	0	0	1
Березники	Berezniki	0.60594	5	0	0	0	0	0	0	0	0	0	0	0	0	0	0	0	0	0	1	0	1
Новороссийск	Novorossiysk	0.594397	13	0	0	0	0	0	1	0	0	0	0	0	0	0	0	0	0	0	0	0	1
Волжский	Volzhsky	0.58997	14	0	0	0	0	0	0	0	0	0	0	0	0	1	0	0	0	0	0	0	1
Клайпеда	Klaipeda	0.564528	5	0	0	0	0	0	0	1	0	0	0	0	1	0	0	0	0	0	0	0	1
Киселевск	Kiselevsk	0.55385	1	0	0	0	0	0	0	0	0	0	0	0	0	0	0	0	0	1	0	0	1
Новомосковск/Сталиногорск	Novomoskovsk	0.543517	5	0	0	0	0	0	0	0	0	0	0	0	0	0	0	0	0	1	0	0	1
Сыктывкар	Syktyvkar	0.543435	4	0	0	1	0	0	0	0	0	0	0	0	0	0	0	0	0	0	0	0	1
Керчь	Kerch	0.53309	3	0	0	0	0	0	1	0	0	0	0	0	0	0	0	0	0	0	0	0	1
Якутск	Yakutsk	0.504213	4	0	0	1	0	0	0	0	0	0	0	0	0	0	0	0	0	0	0	0	1
Черемхово	Cheremkhovo	0.485632	0	0	0	0	0	0	0	0	0	0	0	0	0	0	0	0	0	1	0	0	1
Новошахтинск	Novoshakhtinsk	0.477744	0	0	0	0	0	0	0	0	0	0	0	0	0	0	0	0	0	1	0	0	1
Ялта	Yalta	0.476549	15	0	0	0	0	0	1	0	0	0	0	0	1	0	0	0	0	0	0	0	1
Анжеро-Судженск	Anzhero-Sudzhensk	0.47356	1	0	0	0	0	0	0	0	0	0	0	0	0	0	0	0	0	1	0	0	1
Чистяково/Торез	Chystiakove	0.473421	0	0	0	0	0	0	0	0	0	0	0	0	0	0	0	0	0	1	0	0	1
Находка	Nakhodka	0.456417	6	0	0	0	0	0	0	0	0	0	0	1	0	0	0	0	0	0	0	0	1
Осинники	Osinniki	0.446044	0	0	0	0	0	0	0	0	0	0	0	0	0	0	0	0	0	1	0	0	1
Майкоп	Maykop	0.445667	2	0	0	1	0	0	0	0	0	0	0	0	0	0	0	0	0	0	0	0	1
Лисичанск	Lysychansk	0.438921	2	0	0	0	0	0	0	0	0	0	0	0	0	0	0	0	0	1	0	0	1
Константиновка	Kostyantynivka	0.429505	0	0	0	0	0	0	0	0	0	0	0	0	0	0	0	0	0	0	1	0	1
Красноармейск Донец	Pokrovsk	0.428796	0	0	0	0	0	0	0	0	0	0	0	0	0	0	0	0	0	1	0	0	1
Салават	Salavat	0.428496	0	0	0	1	0	0	0	0	0	0	0	0	0	0	0	0	0	0	0	0	1
Батуми	Batumi	0.426348	5	0	0	0	0	1	1	0	0	0	0	0	1	0	0	0	0	0	0	0	1
Чирчик	Circhik	0.420279	0	0	0	0	0	0	0	0	0	0	0	0	0	0	0	0	0	0	1	0	1
Джезказган	Zhezqazghan	0.418203	8	0	0	0	0	0	0	0	0	0	0	0	0	0	0	0	0	0	1	0	1
Кизел	Kizel	0.408424	0	0	0	0	0	0	0	0	0	0	0	0	0	0	0	0	0	1	0	0	1
Узловая	Uzlovaya	0.403009	0	0	0	0	0	0	0	0	0	0	0	0	0	0	0	0	0	1	0	0	1
Артем	Artyom	0.400287	0	0	0	0	0	0	0	0	0	0	0	0	0	0	0	0	0	1	0	0	1
Харцызск	Khartsyzk	0.399887	0	0	0	0	0	0	0	0	0	0	0	0	0	0	0	0	0	1	0	0	1
Магадан	Magadan	0.394077	6	0	1	0	0	0	0	0	0	0	0	1	0	0	0	0	0	0	0	0	1
Свердловск (Луганск обл)	Dovzhansk	0.390215	0	0	0	0	0	0	0	0	0	0	0	0	0	0	0	0	0	1	0	0	1
Сухуми	Sokhumi	0.389177	9	0	0	0	0	1	1	0	0	0	0	0	1	0	0	0	0	0	0	0	1
Краснодон	Sorokyne	0.384303	2	0	0	0	0	0	0	0	0	0	0	0	0	0	0	0	0	1	0	0	1
Соликамск	Solikamsk	0.383116	1	0	0	0	0	0	0	0	0	0	0	0	0	0	0	0	0	0	1	0	1
Балхаш	Balkhash	0.380852	3	0	0	0	0	0	0	0	0	0	0	0	0	0	0	0	0	0	1	0	1
Лиепая	Liepaja	0.379091	0	0	0	0	0	0	0	1	0	0	0	0	0	0	0	0	0	0	0	0	1
Абакан	Abakan	0.377543	6	0	0	1	0	0	0	0	0	0	0	0	0	0	0	0	0	0	0	0	1
Первомайск (Луганск обл)	Pervomaisk	0.372038	0	0	0	0	0	0	0	0	0	0	0	0	0	0	0	0	0	1	0	0	1
Ревда (Свердл)	Revda	0.348812	2	0	0	0	0	0	0	0	0	0	0	0	0	0	0	0	0	0	1	0	1
Феодосия	Feodosia	0.343605	0	0	0	0	0	0	1	0	0	0	0	0	1	0	0	0	0	0	0	0	1
Гуково	Gukovo	0.341924	0	0	0	0	0	0	0	0	0	0	0	0	0	0	0	0	0	1	0	0	1
Коркино	Korkino	0.341238	5	0	0	0	0	0	0	0	0	0	0	0	0	0	0	0	0	1	0	0	1
Алмалык (Узб)	Almalyk	0.335713	2	0	0	0	0	0	0	0	0	0	0	0	0	0	0	0	0	0	1	0	1
Губаха	Gubakha	0.332399	0	0	0	0	0	0	0	0	0	0	0	0	0	0	0	0	0	1	0	0	1
Лениногорск	Ridder	0.331696	0	0	0	0	0	0	0	0	0	0	0	0	0	0	0	0	0	0	1	0	1
Ангрен	Angren	0.328767	1	0	0	0	0	0	0	0	0	0	0	0	0	0	0	0	0	1	0	0	1
Дзержинск (Донецк обла)	Toretsk	0.320584	0	0	0	0	0	0	0	0	0	0	0	0	0	0	0	0	0	1	0	0	1
Павлоград	Pavlohrad	0.320211	0	0	0	0	0	0	0	0	0	0	0	0	0	0	0	0	0	1	0	0	1
Евпатория	Yevpatoriya	0.319165	2	0	0	0	0	0	1	0	0	0	0	0	1	0	0	0	0	0	0	0	1
Междуреченск	Mezhdurechensk	0.315848	1	0	0	0	0	0	0	0	0	0	0	0	0	0	0	0	0	1	0	0	1
Шахтерск	Shakhtarsk	0.302575	0	0	0	0	0	0	0	0	0	0	0	0	0	0	0	0	0	1	0	0	1
Юрмала	Jurmala	0.212335	1	0	0	0	0	0	0	1	0	0	0	0	1	0	0	0	0	0	0	0	1
Пярну	Parnu	0.205494	0	0	0	0	0	0	0	1	0	0	0	0	1	0	0	0	0	0	0	0	1
Кафан	Kapan	0.117731	0	0	0	0	0	0	0	0	0	0	0	0	0	0	0	0	0	0	1	0	1
Харьков	Kharkiv	5.01365	43	0	1	0	0	0	0	0	0	0	0	0	0	0	0	0	0	0	0	0	0
Горький	Nizhny Novgorod	4.84021	45	0	1	0	0	0	0	0	0	0	0	0	0	0	1	0	1	0	0	1	0
Новосибирск	Novosibirsk	4.75082	33	0	1	0	0	0	0	0	0	0	0	0	0	0	0	0	0	0	0	1	0
Свердловск	Yekaterinburg	4.28609	28	0	1	0	0	0	0	0	0	0	0	0	0	0	0	0	0	0	0	1	0
Днепропетровск	Dnipro	3.77353	16	0	1	0	0	0	0	0	0	0	0	0	0	0	0	0	0	0	0	0	0
Пермь/Молотов	Perm	3.4688	8	0	1	0	0	0	0	0	0	0	0	0	0	0	1	0	0	0	0	0	0
Омск	Omsk	3.38793	30	0	1	0	0	0	0	0	0	0	0	0	0	0	0	0	0	0	0	0	0
Ростов-на-Дону	Rostov-on-Don	3.23283	16	0	1	0	0	0	0	0	1	0	0	0	0	0	0	0	0	0	0	1	0
Саратов	Saratov	3.06503	19	0	1	0	0	0	0	0	0	0	0	0	0	0	1	0	0	0	0	1	0
Воронеж	Voronezh	2.70243	23	0	1	0	0	0	0	0	0	0	0	0	0	0	0	0	0	0	0	0	0
Львов	Lviv	2.3463	27	0	1	0	0	0	0	0	0	0	0	0	0	0	0	0	0	0	0	0	0
Ярославль	Yaroslavl	2.12201	19	0	1	0	0	0	0	0	0	0	0	0	0	0	0	0	0	0	0	0	0
Краснодар	Krasnodar	2.07133	11	0	1	0	0	0	0	0	0	0	0	0	0	0	0	0	0	0	0	0	0
Тула	Tula	2.00426	20	0	1	0	0	0	0	0	0	0	0	0	0	0	0	0	0	0	0	0	0
Иркутск	Irkutsk	1.90514	12	0	1	0	0	0	0	0	0	0	0	0	0	0	1	0	0	0	0	1	0
Барнаул	Barnaul	1.8668	4	0	1	0	0	0	0	0	0	0	0	0	0	0	0	0	0	0	0	0	0
Хабаровск	Khabarovsk	1.78771	16	0	1	0	0	0	0	0	0	0	0	0	0	0	0	0	0	0	0	1	0
Иваново	Ivanovo	1.70448	20	0	1	0	0	0	0	0	0	0	0	0	0	0	0	0	0	0	0	0	0
Астрахань	Astrakhan	1.62448	14	0	1	0	0	0	0	0	0	1	0	0	0	0	0	0	0	0	0	0	0
Ворошиловград/Луганск	Luhansk	1.61074	8	0	1	0	0	0	0	0	0	0	0	0	0	0	0	0	0	0	0	0	0
Пенза	Penza	1.53727	12	0	1	0	0	0	0	0	0	0	0	0	0	0	0	0	0	0	0	0	0
Оренбург/Чкалов	Orenburg	1.4924	10	0	1	0	0	0	0	0	0	0	0	0	0	0	0	0	0	0	0	0	0
Архангельск	Arkhangelsk	1.44449	5	0	1	0	0	0	0	0	0	0	1	0	0	0	0	0	0	0	0	0	0
Калинин	Tver	1.4204	14	0	1	0	0	0	0	0	0	0	0	0	0	0	0	0	0	0	0	0	0
Рязань	Ryazan	1.41416	11	0	1	0	0	0	0	0	0	0	0	0	0	0	0	0	0	0	0	0	0
Ульяновск	Ulyanovsk	1.40297	15	0	1	0	0	0	0	0	0	0	0	0	0	0	0	0	1	0	0	0	0
Томск	Tomsk	1.39892	6	0	1	0	0	0	0	0	0	0	0	0	0	0	0	0	0	0	0	0	0
Киров	Kirov	1.38763	8	0	1	0	0	0	0	0	0	0	0	0	0	0	0	0	0	0	0	0	0
Самарканд	Samarkand	1.35678	3	0	1	0	0	0	0	0	0	0	0	0	0	0	0	0	0	0	0	0	0
Брянск	Bryansk	1.35022	11	0	1	0	0	0	0	0	0	0	0	0	0	0	0	0	1	0	0	0	0
Мурманск	Murmansk	1.26412	6	0	1	0	0	0	0	0	0	0	1	0	0	0	0	0	0	0	0	0	0
Каунас	Kaunas	1.23402	10	0	0	0	0	0	0	0	0	0	0	0	0	0	0	0	0	0	0	0	0
Курск	Kursk	1.19601	19	0	1	0	0	0	0	0	0	0	0	0	0	0	0	0	0	0	0	0	0
Гомель	Gomel	1.16904	3	0	1	0	0	0	0	0	0	0	0	0	0	0	0	0	0	0	0	0	0
Тольятти/Ставрополь-на-Волге	Tolyatti	1.12001	8	0	0	0	0	0	0	0	0	0	0	0	0	0	0	0	1	0	0	0	0
Тюмень	Tyumen	1.06663	6	0	1	0	0	0	0	0	0	0	0	0	0	0	0	0	0	0	0	0	0
Симферополь	Simferopol	1.04587	4	0	1	0	0	0	0	0	0	0	0	0	0	0	0	0	0	0	0	0	0
Таганрог	Taganrog	1.02461	6	0	0	0	0	0	0	0	1	0	0	0	0	0	0	0	0	0	0	0	0
Дзержинск	Dzerzhinsk	1.00424	0	0	0	0	0	0	0	0	0	0	0	0	0	0	0	0	0	0	0	0	0
Чита	Chita	0.991932	0	0	1	0	0	0	0	0	0	0	0	0	0	0	0	0	0	0	0	0	0
Курган	Kurgan	0.962959	5	0	1	0	0	0	0	0	0	0	0	0	0	0	0	0	0	0	0	0	0
Владимир	Vladimir	0.961389	18	0	1	0	0	0	0	0	0	0	0	0	0	0	0	0	0	0	0	0	0
Семипалатинск	Semey	0.957394	1	0	1	0	0	0	0	0	0	0	0	0	0	0	0	0	0	0	0	0	0
Смоленск	Smolensk	0.954024	5	0	1	0	0	0	0	0	0	0	0	0	0	0	0	0	0	0	0	0	0
Орел	Oryol	0.949966	5	0	1	0	0	0	0	0	0	0	0	0	0	0	0	0	0	0	0	0	0
Витебск	Vitebsk	0.937555	10	0	1	0	0	0	0	0	0	0	0	0	0	0	0	0	0	0	0	0	0
Комсомольск-на-Амуре	Komsomolsk-on-Amur	0.935398	6	0	0	0	0	0	0	0	0	0	0	0	0	0	0	0	0	0	0	0	0
Тамбов	Tambov	0.935199	1	0	1	0	0	0	0	0	0	0	0	0	0	0	0	0	0	0	0	0	0
Кострома	Kostroma	0.933303	5	0	1	0	0	0	0	0	0	0	0	0	0	0	0	0	0	0	0	0	0
Рыбинск/Андропов	Rybinsk	0.894459	2	0	0	0	0	0	0	0	0	0	0	0	0	0	0	0	0	0	0	0	0
Полтава	Poltava	0.88638	4	0	1	0	0	0	0	0	0	0	0	0	0	0	0	0	0	0	0	0	0
Винница	Vinnytsia	0.886194	6	0	1	0	0	0	0	0	0	0	0	0	0	0	0	0	0	0	0	0	0
Могилев	Mogilev	0.842911	1	0	1	0	0	0	0	0	0	0	0	0	0	0	0	0	1	0	0	0	0
Калуга	Kaluga	0.842167	6	0	1	0	0	0	0	0	0	0	0	0	0	0	0	0	0	0	0	0	0
Ставрополь	Stavropol	0.826928	7	0	1	0	0	0	0	0	0	0	0	0	0	0	0	0	0	0	0	0	0
Ангарск	Angarsk	0.813186	6	0	0	0	0	0	0	0	0	0	0	0	0	0	0	0	0	0	0	0	0
Вологда	Vologda	0.791935	5	0	1	0	0	0	0	0	0	0	0	0	0	0	0	0	0	0	0	0	0
Кировабад	Ganja	0.778662	4	0	0	0	0	0	0	0	0	0	0	0	0	0	0	0	0	0	0	0	0
Джамбул	Taraz	0.774531	0	0	1	0	0	0	0	0	0	0	0	0	0	0	0	0	0	0	0	0	0
Павлодар	Pavlodar	0.773482	10	0	1	0	0	0	0	0	0	0	0	0	0	0	0	0	0	0	0	0	0
Бийск	Biysk	0.771804	2	0	0	0	0	0	0	0	0	0	0	0	0	0	0	0	0	0	0	0	0
Кировоград	Kropyvnytskyi	0.769808	0	0	1	0	0	0	0	0	0	0	0	0	0	0	0	0	0	0	0	0	0
Черновцы	Chernivtsi	0.76216	1	0	1	0	0	0	0	0	0	0	0	0	0	0	0	0	0	0	0	0	0
Андижан	Andijan	0.760653	2	0	1	0	0	0	0	0	0	0	0	0	0	0	0	0	0	0	0	0	0
Златоуст	Zlatoust	0.757953	0	0	0	0	0	0	0	0	0	0	0	0	0	0	0	0	0	0	0	0	0
Наманган	Namangan	0.727422	0	0	1	0	0	0	0	0	0	0	0	0	0	0	0	0	0	0	0	0	0
Целиноград/Акмолинск	Astana	0.713046	7	0	1	0	0	0	0	0	0	0	0	0	0	0	0	0	0	0	0	0	0
Стерлитамак	Sterlitamak	0.713031	0	0	0	0	1	0	0	0	0	0	0	0	0	0	0	0	0	0	0	0	0
Петропавловск	Petropavl	0.710986	1	0	1	0	0	0	0	0	0	0	0	0	0	0	0	0	0	0	0	0	0
Сызрань	Syzran	0.702934	1	0	0	0	0	0	0	0	0	0	0	0	0	0	0	0	0	0	0	0	0
Житомир	Zhytomyr	0.700497	2	0	1	0	0	0	0	0	0	0	0	0	0	0	0	0	0	0	0	0	0
Каменск-Уральский	Kamensk-Uralsky	0.696868	1	0	0	0	0	0	0	0	0	0	0	0	0	0	0	0	0	0	0	0	0
Подольск	Podolsk	0.695864	2	0	0	0	0	0	0	0	0	0	0	0	0	0	0	0	0	0	0	0	0
Новочеркасск	Novocherkassk	0.684682	0	0	0	0	0	0	0	0	0	0	0	0	0	0	0	0	0	0	0	0	0
Кутаиси	Kutaisi	0.676242	2	0	0	0	0	0	0	0	0	0	0	0	0	0	0	0	1	0	0	0	0
Сумы	Sumy	0.676216	3	0	1	0	0	0	0	0	0	0	0	0	0	0	0	0	0	0	0	0	0
Чернигов	Chernihiv	0.665541	3	0	1	0	0	0	0	0	0	0	0	0	0	0	0	0	0	0	0	0	0
Ленинакан	Gyumri	0.663374	1	0	0	0	0	0	0	0	0	0	0	0	0	0	0	0	0	0	0	0	0
Копейск	Kopeysk	0.656951	2	0	0	0	0	0	0	0	0	0	0	0	0	0	0	0	0	0	0	0	0
Черкассы	Cherkasy	0.644053	1	0	1	0	0	0	0	0	0	0	0	0	0	0	0	0	0	0	0	0	0
Белгород	Belgorod	0.629073	7	0	1	0	0	0	0	0	0	0	0	0	0	0	0	0	0	0	0	0	0
Энгельс	Engels	0.62025	2	0	0	0	0	0	0	0	0	0	0	0	0	0	0	0	0	0	0	0	0
Кременчуг	Kremenchuk	0.609038	9	0	0	0	0	0	0	0	0	0	0	0	0	0	1	0	1	0	0	0	0
Актюбинск	Aktobe	0.603431	2	0	1	0	0	0	0	0	0	0	0	0	0	0	0	0	0	0	0	0	0
Уральск	Oral	0.594361	0	0	1	0	0	0	0	0	0	0	0	0	0	0	0	0	0	0	0	0	0
Бобруйск	Babruysk	0.589801	1	0	0	0	0	0	0	0	0	0	0	0	0	0	0	0	0	0	0	0	0
Армавир	Armavir	0.58311	0	0	0	0	0	0	0	0	0	0	0	0	0	0	0	0	0	0	0	0	0
Рубцовск	Rubtsovsk	0.577424	1	0	0	0	0	0	0	0	0	0	0	0	0	0	0	0	0	0	0	0	0
Северодвинск	Severodvinsk	0.575908	0	0	0	0	0	0	0	0	0	0	1	0	0	0	0	0	0	0	0	0	0
Первоуральск	Pervouralsk	0.574625	2	0	0	0	0	0	0	0	0	0	0	0	0	0	0	0	0	0	0	0	0
Миасс	Miass	0.567141	2	0	0	0	0	0	0	0	0	0	0	0	0	0	0	0	1	0	0	0	0
Славянск	Slovyansk	0.562066	1	0	0	0	0	0	0	0	0	0	0	0	0	0	0	0	0	0	0	0	0
Фергана	Fergana	0.548626	2	0	1	0	0	0	0	0	0	0	0	0	0	0	0	0	0	0	0	0	0
Гродно	Grodno	0.546837	1	0	1	0	0	0	0	0	0	0	0	0	0	0	0	0	0	0	0	0	0
Благовещенск	Blagoveshchensk	0.546168	0	0	1	0	0	0	0	0	0	0	0	0	0	0	0	0	0	0	0	0	0
Коканд	Kokand	0.545631	1	0	0	0	0	0	0	0	0	0	0	0	0	0	0	0	0	0	0	0	0
Мелитополь	Melitopol	0.544186	0	0	0	0	0	0	0	0	1	0	0	0	0	0	0	0	0	0	0	0	0
Люберцы	Lyubertsy	0.544031	8	0	0	0	0	0	0	0	0	0	0	0	0	0	0	0	0	0	0	0	0
Сумгаит	Sumqayit	0.543394	10	0	0	0	0	0	0	0	0	1	0	0	0	0	0	0	0	0	0	0	0
Коломна	Kolomna	0.533923	10	0	0	0	0	0	0	0	0	0	0	0	0	0	0	0	0	0	0	0	0
Уссурийск	Ussuriysk	0.530024	0	0	0	0	0	0	0	0	0	0	0	0	0	0	0	0	0	0	0	0	0
Псков	Pskov	0.527955	1	0	1	0	0	0	0	0	0	0	0	0	0	0	0	0	0	0	0	0	0
Новгород	Veliky Novgorod	0.524738	6	0	1	0	0	0	0	0	0	0	0	0	0	0	0	0	0	0	0	0	0
Серпухов	Serpukhov	0.518917	4	0	0	0	0	0	0	0	0	0	0	0	0	0	0	0	0	0	0	0	0
Кустанай	Kostanay	0.517435	4	0	1	0	0	0	0	0	0	0	0	0	0	0	0	0	0	0	0	0	0
Брест	Brest	0.510666	5	0	1	0	0	0	0	0	0	0	0	0	0	0	0	0	0	0	0	0	0
Ковров	Kovrov	0.509066	0	0	0	0	0	0	0	0	0	0	0	0	0	0	0	0	0	0	0	0	0
Орехово-Зуево	Orekhovo-Zuyevo	0.506797	2	0	0	0	0	0	0	0	0	0	0	0	0	0	0	0	0	0	0	0	0
Электросталь	Elektrostal	0.501635	9	0	0	0	0	0	0	0	0	0	0	0	0	0	0	0	0	0	0	0	0
Мытищи	Mytishchi	0.499914	11	0	0	0	0	0	0	0	0	0	0	0	0	0	0	0	0	0	0	0	0
Бухара	Bukhara	0.499684	4	0	1	0	0	0	0	0	0	0	0	0	0	0	0	0	0	0	0	0	0
Никополь	Nikopol	0.490029	1	0	0	0	0	0	0	0	0	0	0	0	0	0	0	0	0	0	0	0	0
Пятигорск	Pyatigorsk	0.487215	6	0	0	0	0	0	0	0	0	0	0	0	1	0	0	0	0	0	0	0	0
Ош	Osh	0.485194	1	0	1	0	0	0	0	0	0	0	0	0	0	0	0	0	0	0	0	0	0
Ровно	Rivne	0.482069	2	0	1	0	0	0	0	0	0	0	0	0	0	0	0	0	0	0	0	0	0
Хмельницкий	Khmelnytskyi	0.473997	0	0	1	0	0	0	0	0	0	0	0	0	0	0	0	0	0	0	0	0	0
Кзыл-Орда	Kyzylorda	0.472519	0	0	1	0	0	0	0	0	0	0	0	0	0	0	0	0	0	0	0	0	0
Южно-Сахалинск	Yuzhno-Sakhalinsk	0.470469	4	0	1	0	0	0	0	0	0	0	0	0	0	0	0	0	0	0	0	0	0
Набережные Челны/Брежнев	Naberezhnye Chelny	0.466101	9	0	0	0	0	0	0	0	0	0	0	0	0	0	1	0	1	0	0	0	0
Чарджоу	Turkmenabat	0.459308	3	0	1	0	0	0	0	0	0	0	0	0	0	0	0	0	0	0	0	0	0
Артемовск	Bakhmut	0.457868	1	0	0	0	0	0	0	0	0	0	0	0	0	0	0	0	0	0	0	0	0
Белая Церковь	Bila Tserkva	0.454884	0	0	0	0	0	0	0	0	0	0	0	0	0	0	0	0	0	0	0	0	0
Гурьев	Atyrau	0.448828	1	0	1	0	0	0	0	0	0	1	0	0	0	0	0	0	0	0	0	0	0
Тирасполь	Tiraspol	0.446761	3	0	0	0	0	0	0	0	0	0	0	0	0	0	0	0	0	0	0	0	0
Ногинск	Noginsk	0.444962	0	0	0	0	0	0	0	0	0	0	0	0	0	0	0	0	0	0	0	0	0
Мичуринск	Michurinsk	0.441724	0	0	0	0	0	0	0	0	0	0	0	0	0	0	0	0	0	0	0	0	0
Ивано-Франковск/Станислав	Ivano-Frankivsk	0.44129	2	0	1	0	0	0	0	0	0	0	0	0	0	0	0	0	0	0	0	0	0
Калининград МО	Korolyov	0.432433	1	0	0	0	0	0	0	0	0	0	0	0	0	0	0	0	0	0	0	0	0
Ленинабад	Khujand	0.431778	1	0	1	0	0	0	0	0	0	0	0	0	0	0	0	0	0	0	0	0	0
Муром	Murom	0.425637	0	0	0	0	0	0	0	0	0	0	0	0	0	0	0	0	0	0	0	0	0
Маргилан	Margilan	0.412156	2	0	0	0	0	0	0	0	0	0	0	0	0	0	0	0	0	0	0	0	0
Кировакан	Vanadzor	0.411661	0	0	0	0	0	0	0	0	0	0	0	0	0	0	0	0	0	0	0	0	0
Бельцы	Balti	0.406094	0	0	0	0	0	0	0	0	0	0	0	0	0	0	0	0	0	0	0	0	0
Елец	Elets	0.405419	0	0	0	0	0	0	0	0	0	0	0	0	0	0	0	0	0	0	0	0	0
Котлас	Kotlas	0.403795	2	0	0	0	0	0	0	0	0	0	0	0	0	0	0	0	0	0	0	0	0
Луцк	Lutsk	0.401335	0	0	1	0	0	0	0	0	0	0	0	0	0	0	0	0	1	0	0	0	0
Кинешма	Kineshma	0.399922	0	0	0	0	0	0	0	0	0	0	0	0	0	0	0	0	0	0	0	0	0
Орша	Orsha	0.399015	1	0	0	0	0	0	0	0	0	0	0	0	0	0	0	0	0	0	0	0	0
Барановичи	Baranavichy	0.398777	1	0	0	0	0	0	0	0	0	0	0	0	0	0	0	0	0	0	0	0	0
Бердянск	Berdyansk	0.39754	0	0	0	0	0	0	0	0	1	0	0	0	0	0	0	0	0	0	0	0	0
Балаково	Balakovo	0.393629	4	0	0	0	0	0	0	0	0	0	0	0	0	0	1	0	0	0	0	0	0
Канск	Kansk	0.390406	0	0	0	0	0	0	0	0	0	0	0	0	0	0	0	0	0	0	0	0	0
Даугавпилс	Daugavpils	0.390175	1	0	0	0	0	0	0	0	0	0	0	0	0	0	0	0	0	0	0	0	0
Тернополь	Ternopil	0.382815	3	0	1	0	0	0	0	0	0	0	0	0	0	0	0	0	0	0	0	0	0
Новокуйбышевск	Novokuybyshevsk	0.381852	5	0	0	0	0	0	0	0	0	0	0	0	0	0	0	0	0	0	0	0	0
Загорск	Sergiyev Posad	0.381177	0	0	0	0	0	0	0	0	0	0	0	0	0	0	0	0	0	0	0	0	0
Асбест (Свердл)	Asbest	0.380055	1	0	0	0	0	0	0	0	0	0	0	0	0	0	0	0	0	0	0	0	0
Ачинск	Achinsk	0.379448	1	0	0	0	0	0	0	0	0	0	0	0	0	0	0	0	0	0	0	0	0
Сарапул	Sarapul	0.379159	1	0	0	0	1	0	0	0	0	0	0	0	0	0	0	0	0	0	0	0	0
Кисловодск	Kislovodsk	0.376392	3	0	0	0	0	0	0	0	0	0	0	0	1	0	0	0	0	0	0	0	0
Тарту	Tartu	0.376215	9	0	0	0	0	0	0	0	0	0	0	0	0	0	0	0	0	0	0	0	0
Шяуляй	Siauliai	0.374009	2	0	0	0	0	0	0	0	0	0	0	0	0	0	0	0	0	0	0	0	0
Балашиха	Balashikha	0.369206	3	0	0	0	0	0	0	0	0	0	0	0	0	0	0	0	0	0	0	0	0
Камышин	Kamyshin	0.366196	4	0	0	0	0	0	0	0	0	0	0	0	0	0	0	0	0	0	0	0	0
Чапаевск	Chapayevsk	0.359245	0	0	0	0	0	0	0	0	0	0	0	0	0	0	0	0	0	0	0	0	0
Борисов	Barysaw	0.35253	0	0	0	0	0	0	0	0	0	0	0	0	0	0	0	0	0	0	0	0	0
Рудный	Rudny	0.351107	0	0	0	0	0	0	0	0	0	0	0	0	0	0	0	0	0	0	0	0	0
Троицк (Челяб)	Troitsk	0.350981	2	0	0	0	0	0	0	0	0	0	0	0	0	0	0	0	0	0	0	0	0
Химки	Khimki	0.345829	1	0	0	0	0	0	0	0	0	0	0	0	0	0	0	0	0	0	0	0	0
Альметьевск	Almetyevsk	0.340795	2	0	0	0	1	0	0	0	0	0	0	0	0	0	0	0	0	0	0	0	0
Великие Луки	Velikiye Luki	0.340782	0	0	0	0	0	0	0	0	0	0	0	0	0	0	0	0	0	0	0	0	0
Нукус	Nukus	0.33642	1	0	0	0	0	1	0	0	0	0	0	0	0	0	0	0	0	0	0	0	0
Батайск	Bataysk	0.336267	0	0	0	0	0	0	0	0	0	0	0	0	0	0	0	0	0	0	0	0	0
Александров	Aleksandrov	0.336036	0	0	0	0	0	0	0	0	0	0	0	0	0	0	0	0	0	0	0	0	0
Балашов	Balashov	0.335692	0	0	0	0	0	0	0	0	0	0	0	0	0	0	0	0	0	0	0	0	0
Каменск-Шахтинский	Kamensk-Shakhtinsky	0.335227	1	0	0	0	0	0	0	0	0	0	0	0	0	0	0	0	0	0	0	0	0
Щелково	Shchyolkovo	0.334549	3	0	0	0	0	0	0	0	0	0	0	0	0	0	0	0	0	0	0	0	0
Кокчетав	Kokshetau	0.329011	1	0	1	0	0	0	0	0	0	0	0	0	0	0	0	0	0	0	0	0	0
Усолье-Сибирское	Usolye-Sibirskoye	0.328078	0	0	0	0	0	0	0	0	0	0	0	0	0	0	0	0	0	0	0	0	0
Димитровград/Мелекесс	Dimitrovgrad	0.327867	1	0	0	0	0	0	0	0	0	0	0	0	0	0	0	0	0	0	0	0	0
Александрия	Oleksandriia	0.327601	0	0	0	0	0	0	0	0	0	0	0	0	0	0	0	0	0	0	0	0	0
Кузнецк	Kuznetsk	0.325869	1	0	0	0	0	0	0	0	0	0	0	0	0	0	0	0	0	0	0	0	0
Ухта	Ukhta	0.324138	2	0	0	0	1	0	0	0	0	0	0	0	0	0	0	0	0	0	0	0	0
Октябрьский	Oktyabrsky	0.321522	0	0	0	0	1	0	0	0	0	0	0	0	0	0	0	0	0	0	0	0	0
Лысьва	Lysva	0.319267	0	0	0	0	0	0	0	0	0	0	0	0	0	0	0	0	0	0	0	0	0
Кушва	Kushva	0.318774	0	0	0	0	0	0	0	0	0	0	0	0	0	0	0	0	0	0	0	0	0
Клин	Klin	0.312999	5	0	0	0	0	0	0	0	0	0	0	0	0	0	0	0	0	0	0	0	0
Невинномысск	Nevinnomyssk	0.312748	2	0	0	0	0	0	0	0	0	0	0	0	0	0	0	0	0	0	0	0	0
Небит-Даг	Balkanabat	0.311741	1	0	0	0	0	0	0	0	0	0	0	0	0	0	0	0	0	0	0	0	0
Воткинск	Votkinsk	0.311594	4	0	0	0	1	0	0	0	0	0	0	0	0	0	1	0	0	0	0	0	0
Зеленодольск	Zelenodolsk	0.310133	0	0	0	0	1	0	0	0	0	0	0	0	0	0	0	0	0	0	0	0	0
Кунгур	Kungur	0.308078	0	0	0	0	0	0	0	0	0	0	0	0	0	0	0	0	0	0	0	0	0
Вольск	Volsk	0.305494	0	0	0	0	0	0	0	0	0	0	0	0	0	0	0	0	0	0	0	0	0
Ургенч	Urgench	0.302074	0	0	1	0	0	0	0	0	0	0	0	0	0	0	0	0	0	0	0	0	0
Бугульма	Bugulma	0.299578	0	0	0	0	1	0	0	0	0	0	0	0	0	0	0	0	0	0	0	0	0
Бендеры	Bender	0.297371	1	0	0	0	0	0	0	0	0	0	0	0	0	0	0	0	0	0	0	0	0
Паневежис	Panevezys	0.295835	4	0	0	0	0	0	0	0	0	0	0	0	0	0	0	0	0	0	0	0	0
Кохтла-Ярве	Kohtla-Jarve	0.289557	0	0	0	0	0	0	0	0	0	0	0	0	0	0	0	0	0	0	0	0	0
Мары	Mary	0.267225	1	0	1	0	0	0	0	0	0	0	0	0	0	0	0	0	0	0	0	0	0
Ташауз	Dashoguz	0.253949	0	0	1	0	0	0	0	0	0	0	0	0	0	0	0	0	0	0	0	0	0
Нарва	Narva	0.244107	2	0	0	0	0	0	0	0	0	0	0	0	0	0	0	0	0	0	0	0	0
Елгава	Jelgava	0.220268	2	0	0	0	0	0	0	0	0	0	0	0	0	0	0	0	0	0	0	0	0
Пржевальск	Karakol	0.191416	0	0	1	0	0	0	0	0	0	0	0	0	0	0	0	0	0	0	0	0	0
Джалал-Абад	Jalal-Abad	0.181347	0	0	0	0	0	0	0	0	0	0	0	0	0	0	0	0	0	0	0	0	0
Шеки/Нуха	Sheki	0.178937	0	0	0	0	0	0	0	0	0	0	0	0	0	0	0	0	0	0	0	0	0
Токмак (Кирг)	Tokmok	0.178866	0	0	0	0	0	0	0	0	0	0	0	0	0	0	0	0	0	0	0	0	0
Али-Байрамлы	Shirvan	0.170837	1	0	0	0	0	0	0	0	0	0	0	0	0	0	0	0	0	0	0	0	0
Куляб	Kulob	0.162024	0	0	0	0	0	0	0	0	0	0	0	0	0	0	0	0	0	0	0	0	0
Курган-Тюбе	Bokhtar	0.144379	1	0	0	0	0	0	0	0	0	0	0	0	0	0	0	0	0	0	0	0	0
Эчмиадзин	Vagharshapat	0.131335	0	0	0	0	0	0	0	0	0	0	0	0	0	0	0	0	0	0	0	0	0
Ура-Тюбе	Istaravshan	0.130802	0	0	0	0	0	0	0	0	0	0	0	0	0	0	0	0	0	0	0	0	0
Рыбница	Ribnita	0.12742	3	0	0	0	0	0	0	0	0	0	0	0	0	0	0	0	0	0	0	0	0
				14	112	17	10	3	12	8	5	5	3	4	11	5	10	18	14	38	18	26

[truncated: 7 more sheets: Spec_clustering_log, Spec_confidence, Spec_expectations, Full_variables, Full_clustering_log, Full_confidence, Full_expectations]
