# Supplementary material for: Quantifying world geography as seen through the lens of Soviet propaganda
Source: Research Square preprint supplement (doi:10.21203/rs.3.rs-5623774/v1), 2025-03-20
Supplement: Supplementary file 2 [file ef9e8ecfc40230e394b34c7e.xlsx]

## Sheet: Master
City	Country	Pop, 1970	Mentions	Capital	Population	Socialist	W.Eur	USA	Can	Aus	Jap	Aut	Fin	Pol	Cz	Yug	Hun	GDR	Bul	Alb	Rom	Chi	NK	Vie	Mon	Cub	L.Am	Afr	Asia
Tokyo	Japan	23.298	16	1	104.926	0	0	0	0	0	1	0	0	0	0	0	0	0	0	0	0	0	0	0	0	0	0	0	0
New York	USA	16.191	29	0	209.588	0	0	1	0	0	0	0	0	0	0	0	0	0	0	0	0	0	0	0	0	0	0	0	0
Osaka	Japan	15.278	3	0	104.926	0	0	0	0	0	1	0	0	0	0	0	0	0	0	0	0	0	0	0	0	0	0	0	0
Mexico	Mexico	8.831	6	1	52.03	0	0	0	0	0	0	0	0	0	0	0	0	0	0	0	0	0	0	0	0	0	1	0	0
Buenos Aires	Argentina	8.416	3	1	23.973	0	0	0	0	0	0	0	0	0	0	0	0	0	0	0	0	0	0	0	0	0	1	0	0
Los Angeles	USA	8.378	0	0	209.588	0	0	1	0	0	0	0	0	0	0	0	0	0	0	0	0	0	0	0	0	0	0	0	0
Paris	France	8.208	39	1	50.844	0	1	0	0	0	0	0	0	0	0	0	0	0	0	0	0	0	0	0	0	0	0	0	0
São Paulo	Brazil	7.62	0	0	95.327	0	0	0	0	0	0	0	0	0	0	0	0	0	0	0	0	0	0	0	0	0	1	0	0
London	UK	7.509	19	1	55.635	0	1	0	0	0	0	0	0	0	0	0	0	0	0	0	0	0	0	0	0	0	0	0	0
Calcutta	India	7.329	2	0	553.579	0	0	0	0	0	0	0	0	0	0	0	0	0	0	0	0	0	0	0	0	0	0	0	1
Chicago	USA	7.106	0	0	209.588	0	0	1	0	0	0	0	0	0	0	0	0	0	0	0	0	0	0	0	0	0	0	0	0
Rio de Janeiro	Brazil	6.791	2	0	95.327	0	0	0	0	0	0	0	0	0	0	0	0	0	0	0	0	0	0	0	0	0	1	0	0
Nagoya	Japan	6.603	0	0	104.926	0	0	0	0	0	1	0	0	0	0	0	0	0	0	0	0	0	0	0	0	0	0	0	0
Bombay	India	6.413	3	0	553.579	0	0	0	0	0	0	0	0	0	0	0	0	0	0	0	0	0	0	0	0	0	0	0	1
Shanghai	China	6.052	4	0	824.788	1	0	0	0	0	0	0	0	0	0	0	0	0	0	0	0	1	0	0	0	0	0	0	0
Cairo	Egypt	5.585	11	1	35.046	0	0	0	0	0	0	0	0	0	0	0	0	0	0	0	0	0	0	0	0	0	0	1	0
Seoul	South Korea	5.312	1	1	32.209	0	0	0	0	0	0	0	0	0	0	0	0	0	0	0	0	0	0	0	0	0	0	0	1
Beijing	China	4.426	19	1	824.788	1	0	0	0	0	0	0	0	0	0	0	0	0	0	0	0	1	0	0	0	0	0	0	0
Philadelphia	USA	4.396	2	0	209.588	0	0	1	0	0	0	0	0	0	0	0	0	0	0	0	0	0	0	0	0	0	0	0	0
Kitakyushu-Fukuoka	Japan	4.072	0	0	104.926	0	0	0	0	0	1	0	0	0	0	0	0	0	0	0	0	0	0	0	0	0	0	0	0
Detroit	USA	3.966	0	0	209.588	0	0	1	0	0	0	0	0	0	0	0	0	0	0	0	0	0	0	0	0	0	0	0	0
Jakarta	Indonesia	3.915	3	1	114.835	0	0	0	0	0	0	0	0	0	0	0	0	0	0	0	0	0	0	0	0	0	0	0	1
Manila	Philippines	3.534	1	1	35.805	0	0	0	0	0	0	0	0	0	0	0	0	0	0	0	0	0	0	0	0	0	0	0	1
Delhi	India	3.531	17	1	553.579	0	0	0	0	0	0	0	0	0	0	0	0	0	0	0	0	0	0	0	0	0	0	0	1
Madrid	Spain	3.521	2	1	33.98	0	1	0	0	0	0	0	0	0	0	0	0	0	0	0	0	0	0	0	0	0	0	0	0
Barcelona	Spain	3.482	2	0	33.98	0	1	0	0	0	0	0	0	0	0	0	0	0	0	0	0	0	0	0	0	0	0	0	0
Hong Kong	Hong Kong	3.398	0	0	3.873	0	0	0	0	0	0	0	0	0	0	0	0	0	0	0	0	0	0	0	0	0	0	0	1
Tianjin	China	3.318	0	0	824.788	1	0	0	0	0	0	0	0	0	0	0	0	0	0	0	0	1	0	0	0	0	0	0	0
Tehran	Iran	3.29	1	1	28.514	0	0	0	0	0	0	0	0	0	0	0	0	0	0	0	0	0	0	0	0	0	0	0	1
Berlin	East Germany	3.206	62	1	17.068	1	0	0	0	0	0	0	0	0	0	0	0	1	0	0	0	0	0	0	0	0	0	0	0
Boston	USA	3.187	0	0	209.588	0	0	1	0	0	0	0	0	0	0	0	0	0	0	0	0	0	0	0	0	0	0	0	0
Shenyang	China	3.156	0	0	824.788	1	0	0	0	0	0	0	0	0	0	0	0	0	0	0	0	1	0	0	0	0	0	0	0
Rome	Italy	3.135	10	1	53.579	0	1	0	0	0	0	0	0	0	0	0	0	0	0	0	0	0	0	0	0	0	0	0	0
Karachi	Pakistan	3.119	1	0	123.139	0	0	0	0	0	0	0	0	0	0	0	0	0	0	0	0	0	0	0	0	0	0	0	1
Bangkok	Thailand	3.11	0	1	36.885	0	0	0	0	0	0	0	0	0	0	0	0	0	0	0	0	0	0	0	0	0	0	0	1
Madras	India	3.044	0	0	553.579	0	0	0	0	0	0	0	0	0	0	0	0	0	0	0	0	0	0	0	0	0	0	0	1
Milan	Italy	3.017	3	0	53.579	0	1	0	0	0	0	0	0	0	0	0	0	0	0	0	0	0	0	0	0	0	0	0	0
Lima	Peru	2.98	1	1	13.341	0	0	0	0	0	0	0	0	0	0	0	0	0	0	0	0	0	0	0	0	0	1	0	0
Sydney	Australia	2.892	1	0	12.843	0	0	0	0	1	0	0	0	0	0	0	0	0	0	0	0	0	0	0	0	0	0	0	0
Istanbul	Turkey	2.772	1	0	34.876	0	0	0	0	0	0	0	0	0	0	0	0	0	0	0	0	0	0	0	0	0	0	1	0
Montreal	Canada	2.684	3	0	21.453	0	0	0	1	0	0	0	0	0	0	0	0	0	0	0	0	0	0	0	0	0	0	0	0
Santiago	Chile	2.647	7	1	9.564	0	0	0	0	0	0	0	0	0	0	0	0	0	0	0	0	0	0	0	0	0	1	0	0
Toronto	Canada	2.535	0	0	21.453	0	0	0	1	0	0	0	0	0	0	0	0	0	0	0	0	0	0	0	0	0	0	0	0
San Francisco	USA	2.529	4	0	209.588	0	0	1	0	0	0	0	0	0	0	0	0	0	0	0	0	0	0	0	0	0	0	0	0
Melbourne	Australia	2.499	4	0	12.843	0	0	0	0	1	0	0	0	0	0	0	0	0	0	0	0	0	0	0	0	0	0	0	0
Washington	USA	2.488	16	1	209.588	0	0	1	0	0	0	0	0	0	0	0	0	0	0	0	0	0	0	0	0	0	0	0	0
Athens	Greece	2.485	3	1	8.66	0	1	0	0	0	0	0	0	0	0	0	0	0	0	0	0	0	0	0	0	0	0	0	0
Manchester	UK	2.396	0	0	55.635	0	1	0	0	0	0	0	0	0	0	0	0	0	0	0	0	0	0	0	0	0	0	0	0
Bogota	Colombia	2.383	0	1	22.061	0	0	0	0	0	0	0	0	0	0	0	0	0	0	0	0	0	0	0	0	0	1	0	0
Birmingham	UK	2.37	0	0	55.635	0	1	0	0	0	0	0	0	0	0	0	0	0	0	0	0	0	0	0	0	0	0	0	0
Chongqing	China	2.237	2	0	824.788	1	0	0	0	0	0	0	0	0	0	0	0	0	0	0	0	1	0	0	0	0	0	0	0
Miami	USA	2.141	0	0	209.588	0	0	1	0	0	0	0	0	0	0	0	0	0	0	0	0	0	0	0	0	0	0	0	0
Singapore	Singapore	2.072	0	1	2.072	0	0	0	0	0	0	0	0	0	0	0	0	0	0	0	0	0	0	0	0	0	0	0	1
Baghdad	Iraq	2.07	3	1	9.918	0	0	0	0	0	0	0	0	0	0	0	0	0	0	0	0	0	0	0	0	0	0	0	1
Caracas	Venezuela	2.06	0	1	11.588	0	0	0	0	0	0	0	0	0	0	0	0	0	0	0	0	0	0	0	0	0	1	0	0
Wuhan	China	2.039	0	0	824.788	1	0	0	0	0	0	0	0	0	0	0	0	0	0	0	0	1	0	0	0	0	0	0	0
Dallas	USA	2.025	0	0	209.588	0	0	1	0	0	0	0	0	0	0	0	0	0	0	0	0	0	0	0	0	0	0	0	0
Naples	Italy	2	0	0	53.579	0	1	0	0	0	0	0	0	0	0	0	0	0	0	0	0	0	0	0	0	0	0	0	0
Alexandria	Egypt	1.987	1	0	35.046	0	0	0	0	0	0	0	0	0	0	0	0	0	0	0	0	0	0	0	0	0	0	1	0
Ho Chi Minh City	Viet Nam	1.97	4	0	43.407	1	0	0	0	0	0	0	0	0	0	0	0	0	0	0	0	0	0	1	0	0	0	0	0
Lahore	Pakistan	1.964	0	0	123.139	0	0	0	0	0	0	0	0	0	0	0	0	0	0	0	0	0	0	0	0	0	0	0	1
Cleveland	USA	1.954	0	0	209.588	0	0	1	0	0	0	0	0	0	0	0	0	0	0	0	0	0	0	0	0	0	0	0	0
Rangun	Myanmar	1.946	3	1	26.381	0	0	0	0	0	0	0	0	0	0	0	0	0	0	0	0	0	0	0	0	0	0	0	1
Budapest	Hungary	1.946	34	1	10.366	1	0	0	0	0	0	0	0	0	0	0	1	0	0	0	0	0	0	0	0	0	0	0	0
St Louis	USA	1.882	0	0	209.588	0	0	1	0	0	0	0	0	0	0	0	0	0	0	0	0	0	0	0	0	0	0	0	0
Pittsburgh	USA	1.845	0	0	209.588	0	0	1	0	0	0	0	0	0	0	0	0	0	0	0	0	0	0	0	0	0	0	0	0
Lisbon	Portugal	1.817	2	1	8.702	0	1	0	0	0	0	0	0	0	0	0	0	0	0	0	0	0	0	0	0	0	0	0	0
Busan	South Korea	1.813	0	0	32.209	0	0	0	0	0	0	0	0	0	0	0	0	0	0	0	0	0	0	0	0	0	0	0	1
Hamburg	West Germany	1.792	7	0	61.505	0	1	0	0	0	0	0	0	0	0	0	0	0	0	0	0	0	0	0	0	0	0	0	0
Havana	Cuba	1.779	20	1	8.715	1	0	0	0	0	0	0	0	0	0	0	0	0	0	0	0	0	0	0	0	1	0	0	0
Turin	Italy	1.76	3	0	53.579	0	1	0	0	0	0	0	0	0	0	0	0	0	0	0	0	0	0	0	0	0	0	0	0
Chengdu	China	1.75	1	0	824.788	1	0	0	0	0	0	0	0	0	0	0	0	0	0	0	0	1	0	0	0	0	0	0	0
Hyderabad	India	1.748	0	0	553.579	0	0	0	0	0	0	0	0	0	0	0	0	0	0	0	0	0	0	0	0	0	0	0	1
Glasgow	UK	1.734	0	0	55.635	0	1	0	0	0	0	0	0	0	0	0	0	0	0	0	0	0	0	0	0	0	0	0	0
Leeds	UK	1.726	0	0	55.635	0	1	0	0	0	0	0	0	0	0	0	0	0	0	0	0	0	0	0	0	0	0	0	0
Minneapolis	USA	1.706	0	0	209.588	0	0	1	0	0	0	0	0	0	0	0	0	0	0	0	0	0	0	0	0	0	0	0	0
Haerbin	China	1.696	0	0	824.788	1	0	0	0	0	0	0	0	0	0	0	0	0	0	0	0	1	0	0	0	0	0	0	0
Ahmedabad	India	1.695	0	0	553.579	0	0	0	0	0	0	0	0	0	0	0	0	0	0	0	0	0	0	0	0	0	0	0	1
Houston	USA	1.693	0	0	209.588	0	0	1	0	0	0	0	0	0	0	0	0	0	0	0	0	0	0	0	0	0	0	0	0
Recife	Brazil	1.638	0	0	95.327	0	0	0	0	0	0	0	0	0	0	0	0	0	0	0	0	0	0	0	0	0	1	0	0
Vienna	Austria	1.621	43	1	7.516	0	0	0	0	0	0	1	0	0	0	0	0	0	0	0	0	0	0	0	0	0	0	0	0
Bangalore	India	1.615	0	0	553.579	0	0	0	0	0	0	0	0	0	0	0	0	0	0	0	0	0	0	0	0	0	0	0	1
Brussels	Belgium	1.568	10	1	9.632	0	1	0	0	0	0	0	0	0	0	0	0	0	0	0	0	0	0	0	0	0	0	0	0
Seattle	USA	1.556	0	0	209.588	0	0	1	0	0	0	0	0	0	0	0	0	0	0	0	0	0	0	0	0	0	0	0	0
Baltimore	USA	1.555	0	0	209.588	0	0	1	0	0	0	0	0	0	0	0	0	0	0	0	0	0	0	0	0	0	0	0	0
Guangzhou	China	1.542	0	0	824.788	1	0	0	0	0	0	0	0	0	0	0	0	0	0	0	0	1	0	0	0	0	0	0	0
Guadalajara	Mexico	1.506	0	0	52.03	0	0	0	0	0	0	0	0	0	0	0	0	0	0	0	0	0	0	0	0	0	1	0	0
Casablanca	Morocco	1.505	1	0	16	0	0	0	0	0	0	0	0	0	0	0	0	0	0	0	0	0	0	0	0	0	0	1	0
Belo Horizonte	Brazil	1.485	0	0	95.327	0	0	0	0	0	0	0	0	0	0	0	0	0	0	0	0	0	0	0	0	0	1	0	0
Sapporo	Japan	1.479	0	0	104.926	0	0	0	0	0	1	0	0	0	0	0	0	0	0	0	0	0	0	0	0	0	0	0	0
Surabaya	Indonesia	1.474	0	0	114.835	0	0	0	0	0	0	0	0	0	0	0	0	0	0	0	0	0	0	0	0	0	0	0	1
Nanjing	China	1.459	0	0	824.788	1	0	0	0	0	0	0	0	0	0	0	0	0	0	0	0	1	0	0	0	0	0	0	0
Johannesburg	South Africa	1.443	1	0	22.839	0	0	0	0	0	0	0	0	0	0	0	0	0	0	0	0	0	0	0	0	0	0	1	0
Lagos	Nigeria	1.414	0	1	55.981	0	0	0	0	0	0	0	0	0	0	0	0	0	0	0	0	0	0	0	0	0	0	1	0
Taibei	Taiwan	1.406	0	0	14.693	0	0	0	0	0	0	0	0	0	0	0	0	0	0	0	0	0	0	0	0	0	0	0	1
Porto Alegre	Brazil	1.398	0	0	95.327	0	0	0	0	0	0	0	0	0	0	0	0	0	0	0	0	0	0	0	0	0	1	0	0
Bucharest	Romania	1.396	20	1	20.549	1	0	0	0	0	0	0	0	0	0	0	0	0	0	0	1	0	0	0	0	0	0	0	0
Copenhagen	Denmark	1.38	2	1	4.931	0	1	0	0	0	0	0	0	0	0	0	0	0	0	0	0	0	0	0	0	0	0	0	0
Hiroshima	Japan	1.379	4	0	104.926	0	0	0	0	0	1	0	0	0	0	0	0	0	0	0	0	0	0	0	0	0	0	0	0
Dhaka	Pakistan	1.374	1	0	123.139	0	0	0	0	0	0	0	0	0	0	0	0	0	0	0	0	0	0	0	0	0	0	0	1
Montevideo	Uruguay	1.362	0	1	2.81	0	0	0	0	0	0	0	0	0	0	0	0	0	0	0	0	0	0	0	0	0	1	0	0
Ankara	Turkey	1.341	0	1	34.876	0	0	0	0	0	0	0	0	0	0	0	0	0	0	0	0	0	0	0	0	0	0	1	0
Warsaw	Poland	1.3	64	1	32.636	1	0	0	0	0	0	0	0	1	0	0	0	0	0	0	0	0	0	0	0	0	0	0	0
Monterrey	Mexico	1.299	0	0	52.03	0	0	0	0	0	0	0	0	0	0	0	0	0	0	0	0	0	0	0	0	0	1	0	0
Munich	West Germany	1.294	3	0	61.505	0	1	0	0	0	0	0	0	0	0	0	0	0	0	0	0	0	0	0	0	0	0	0	0
Algiers	Algeria	1.281	1	1	14.55	0	0	0	0	0	0	0	0	0	0	0	0	0	0	0	0	0	0	0	0	0	0	1	0
Liverpool	UK	1.276	0	0	55.635	0	1	0	0	0	0	0	0	0	0	0	0	0	0	0	0	0	0	0	0	0	0	0	0
Sendai	Japan	1.264	0	0	104.926	0	0	0	0	0	1	0	0	0	0	0	0	0	0	0	0	0	0	0	0	0	0	0	0
Medellin	Colombia	1.26	0	0	22.061	0	0	0	0	0	0	0	0	0	0	0	0	0	0	0	0	0	0	0	0	0	1	0	0
New Taipei	Taiwan	1.255	0	0	14.693	0	0	0	0	0	0	0	0	0	0	0	0	0	0	0	0	0	0	0	0	0	0	0	1
Changchun	China	1.255	2	0	824.788	1	0	0	0	0	0	0	0	0	0	0	0	0	0	0	0	1	0	0	0	0	0	0	0
Milwakee	USA	1.251	0	0	209.588	0	0	1	0	0	0	0	0	0	0	0	0	0	0	0	0	0	0	0	0	0	0	0	0
Kanhpur	India	1.25	0	0	553.579	0	0	0	0	0	0	0	0	0	0	0	0	0	0	0	0	0	0	0	0	0	0	0	1
San Diego	USA	1.209	0	0	209.588	0	0	1	0	0	0	0	0	0	0	0	0	0	0	0	0	0	0	0	0	0	0	0	0
Cincinnati	USA	1.202	0	0	209.588	0	0	1	0	0	0	0	0	0	0	0	0	0	0	0	0	0	0	0	0	0	0	0	0
Atlanta	USA	1.182	0	0	209.588	0	0	1	0	0	0	0	0	0	0	0	0	0	0	0	0	0	0	0	0	0	0	0	0
Marseille	France	1.182	2	0	50.844	0	1	0	0	0	0	0	0	0	0	0	0	0	0	0	0	0	0	0	0	0	0	0	0
Dalian	China	1.177	0	0	824.788	1	0	0	0	0	0	0	0	0	0	0	0	0	0	0	0	1	0	0	0	0	0	0	0
Bandung	Indonesia	1.17	1	0	114.835	0	0	0	0	0	0	0	0	0	0	0	0	0	0	0	0	0	0	0	0	0	0	0	1
Lyon	France	1.116	0	0	50.844	0	1	0	0	0	0	0	0	0	0	0	0	0	0	0	0	0	0	0	0	0	0	0	0
Cape Town	South Africa	1.114	0	0	22.839	0	0	0	0	0	0	0	0	0	0	0	0	0	0	0	0	0	0	0	0	0	0	1	0
Pune	India	1.105	0	0	553.579	0	0	0	0	0	0	0	0	0	0	0	0	0	0	0	0	0	0	0	0	0	0	0	1
Stockholm	Sweden	1.096	10	1	8.055	0	1	0	0	0	0	0	0	0	0	0	0	0	0	0	0	0	0	0	0	0	0	0	0
Kansas City	USA	1.086	0	0	209.588	0	0	1	0	0	0	0	0	0	0	0	0	0	0	0	0	0	0	0	0	0	0	0	0
Buffalo	USA	1.084	0	0	209.588	0	0	1	0	0	0	0	0	0	0	0	0	0	0	0	0	0	0	0	0	0	0	0	0
Prague	Czechoslovakia	1.076	51	1	14.357	1	0	0	0	0	0	0	0	0	1	0	0	0	0	0	0	0	0	0	0	0	0	0	0
Kinshasa	Zaire	1.07	0	1	20.01	0	0	0	0	0	0	0	0	0	0	0	0	0	0	0	0	0	0	0	0	0	0	1	0
Salvador	Brazil	1.069	0	0	95.327	0	0	0	0	0	0	0	0	0	0	0	0	0	0	0	0	0	0	0	0	0	1	0	0
Jinan	China	1.06	0	0	824.788	1	0	0	0	0	0	0	0	0	0	0	0	0	0	0	0	1	0	0	0	0	0	0	0
Denver	USA	1.054	0	0	209.588	0	0	1	0	0	0	0	0	0	0	0	0	0	0	0	0	0	0	0	0	0	0	0	0
Daegu	South Korea	1.048	0	0	32.209	0	0	0	0	0	0	0	0	0	0	0	0	0	0	0	0	0	0	0	0	0	0	0	1
Vancouver	Canada	1.045	0	0	21.453	0	0	0	1	0	0	0	0	0	0	0	0	0	0	0	0	0	0	0	0	0	0	0	0
Tel Aviv	Israel	1.029	0	1	2.85	0	0	0	0	0	0	0	0	0	0	0	0	0	0	0	0	0	0	0	0	0	0	0	1
Hangzhou	China	1.025	0	0	824.788	1	0	0	0	0	0	0	0	0	0	0	0	0	0	0	0	1	0	0	0	0	0	0	0
San Jose	USA	1.009	1	0	209.588	0	0	1	0	0	0	0	0	0	0	0	0	0	0	0	0	0	0	0	0	0	0	0	0
Pyongyang	North Korea	0.987	14	1	14.41	1	0	0	0	0	0	0	0	0	0	0	0	0	0	0	0	0	1	0	0	0	0	0	0
Rotterdam	Netherlands	0.967	2	0	13.002	0	1	0	0	0	0	0	0	0	0	0	0	0	0	0	0	0	0	0	0	0	0	0	0
X'ian	China	0.96	0	0	824.788	1	0	0	0	0	0	0	0	0	0	0	0	0	0	0	0	1	0	0	0	0	0	0	0
Amsterdam	Netherlands	0.927	1	1	13.002	0	1	0	0	0	0	0	0	0	0	0	0	0	0	0	0	0	0	0	0	0	0	0	0
Porto	Portugal	0.924	0	0	8.702	0	1	0	0	0	0	0	0	0	0	0	0	0	0	0	0	0	0	0	0	0	0	0	0
Beirut	Lebanon	0.923	2	1	2.297	0	0	0	0	0	0	0	0	0	0	0	0	0	0	0	0	0	0	0	0	0	0	0	1
Genova	Italy	0.921	0	0	53.579	0	1	0	0	0	0	0	0	0	0	0	0	0	0	0	0	0	0	0	0	0	0	0	0
Guatemala City	Guatemala	0.917	0	1	5.622	0	0	0	0	0	0	0	0	0	0	0	0	0	0	0	0	0	0	0	0	0	1	0	0
Damascus	Syria	0.914	0	1	6.351	0	0	0	0	0	0	0	0	0	0	0	0	0	0	0	0	0	0	0	0	0	0	0	1
Lille	France	0.906	0	0	50.844	0	1	0	0	0	0	0	0	0	0	0	0	0	0	0	0	0	0	0	0	0	0	0	0
Qingdao	China	0.906	0	0	824.788	1	0	0	0	0	0	0	0	0	0	0	0	0	0	0	0	1	0	0	0	0	0	0	0
Phnom Penh	Cambodia	0.9	2	1	6.995	0	0	0	0	0	0	0	0	0	0	0	0	0	0	0	0	0	0	0	0	0	0	0	1
Sofia	Bulgaria	0.888	29	1	8.507	1	0	0	0	0	0	0	0	0	0	0	0	0	1	0	0	0	0	0	0	0	0	0	0
Newcastle	UK	0.886	0	0	55.635	0	1	0	0	0	0	0	0	0	0	0	0	0	0	0	0	0	0	0	0	0	0	0	0
Belgrade	Yugoslavia	0.878	10	1	20.215	1	0	0	0	0	0	0	0	0	0	1	0	0	0	0	0	0	0	0	0	0	0	0	0
Lanzhou	China	0.863	0	0	824.788	1	0	0	0	0	0	0	0	0	0	0	0	0	0	0	0	1	0	0	0	0	0	0	0
Antwerpen	Belgium	0.855	0	0	9.632	0	1	0	0	0	0	0	0	0	0	0	0	0	0	0	0	0	0	0	0	0	0	0	0
Cologne	West Germany	0.849	2	0	61.505	0	1	0	0	0	0	0	0	0	0	0	0	0	0	0	0	0	0	0	0	0	0	0	0
Fushun	China	0.829	0	0	824.788	1	0	0	0	0	0	0	0	0	0	0	0	0	0	0	0	1	0	0	0	0	0	0	0
Anshan	China	0.813	0	0	824.788	1	0	0	0	0	0	0	0	0	0	0	0	0	0	0	0	1	0	0	0	0	0	0	0
Dublin	Ireland	0.771	0	1	2.95	0	1	0	0	0	0	0	0	0	0	0	0	0	0	0	0	0	0	0	0	0	0	0	0
Wenzhou	China	0.767	0	0	824.788	1	0	0	0	0	0	0	0	0	0	0	0	0	0	0	0	1	0	0	0	0	0	0	0
Tunis	Tunisia	0.761	0	1	5.06	0	0	0	0	0	0	0	0	0	0	0	0	0	0	0	0	0	0	0	0	0	0	1	0
Lodz	Poland	0.759	2	0	32.636	1	0	0	0	0	0	0	0	1	0	0	0	0	0	0	0	0	0	0	0	0	0	0	0
Baotou	China	0.754	0	0	824.788	1	0	0	0	0	0	0	0	0	0	0	0	0	0	0	0	1	0	0	0	0	0	0	0
Palermo	Italy	0.751	1	0	53.579	0	1	0	0	0	0	0	0	0	0	0	0	0	0	0	0	0	0	0	0	0	0	0	0
Southampton-Portsmouth	UK	0.745	3	0	55.635	0	1	0	0	0	0	0	0	0	0	0	0	0	0	0	0	0	0	0	0	0	0	0	0
Bologna	Italy	0.743	0	0	53.579	0	1	0	0	0	0	0	0	0	0	0	0	0	0	0	0	0	0	0	0	0	0	0	0
Changsha	China	0.731	0	0	824.788	1	0	0	0	0	0	0	0	0	0	0	0	0	0	0	0	1	0	0	0	0	0	0	0
Addis Ababa	Ethiopia	0.729	3	1	28.415	0	0	0	0	0	0	0	0	0	0	0	0	0	0	0	0	0	0	0	0	0	0	1	0
Guiyang	China	0.722	0	0	824.788	1	0	0	0	0	0	0	0	0	0	0	0	0	0	0	0	1	0	0	0	0	0	0	0
Florence	Italy	0.721	2	0	53.579	0	1	0	0	0	0	0	0	0	0	0	0	0	0	0	0	0	0	0	0	0	0	0	0
Zurich	Switzerland	0.711	0	0	6.169	0	1	0	0	0	0	0	0	0	0	0	0	0	0	0	0	0	0	0	0	0	0	0	0
The Hague	Netherlands	0.708	1	0	13.002	0	1	0	0	0	0	0	0	0	0	0	0	0	0	0	0	0	0	0	0	0	0	0	0
Essen	West Germany	0.698	0	0	61.505	0	1	0	0	0	0	0	0	0	0	0	0	0	0	0	0	0	0	0	0	0	0	0	0
Shijiazhuang	China	0.692	0	0	824.788	1	0	0	0	0	0	0	0	0	0	0	0	0	0	0	0	1	0	0	0	0	0	0	0
Santo Domingo	Dominican Rep	0.687	1	1	4.503	0	0	0	0	0	0	0	0	0	0	0	0	0	0	0	0	0	0	0	0	0	1	0	0
Frankfurt	West Germany	0.669	3	0	61.505	0	1	0	0	0	0	0	0	0	0	0	0	0	0	0	0	0	0	0	0	0	0	0	0
Nottingham	UK	0.666	0	0	55.635	0	1	0	0	0	0	0	0	0	0	0	0	0	0	0	0	0	0	0	0	0	0	0	0
Duesseldorf	West Germany	0.663	1	0	61.505	0	1	0	0	0	0	0	0	0	0	0	0	0	0	0	0	0	0	0	0	0	0	0	0
Sheffield	UK	0.658	0	0	55.635	0	1	0	0	0	0	0	0	0	0	0	0	0	0	0	0	0	0	0	0	0	0	0	0
Khartoum	Sudan	0.657	1	1	13.93	0	0	0	0	0	0	0	0	0	0	0	0	0	0	0	0	0	0	0	0	0	0	1	0
Tangshan	China	0.646	0	0	824.788	1	0	0	0	0	0	0	0	0	0	0	0	0	0	0	0	1	0	0	0	0	0	0	0
Valencia	Spain	0.645	0	0	33.98	0	1	0	0	0	0	0	0	0	0	0	0	0	0	0	0	0	0	0	0	0	0	0	0
Oslo	Norway	0.643	3	1	3.876	0	1	0	0	0	0	0	0	0	0	0	0	0	0	0	0	0	0	0	0	0	0	0	0
Dortmund	West Germany	0.639	2	0	61.505	0	1	0	0	0	0	0	0	0	0	0	0	0	0	0	0	0	0	0	0	0	0	0	0
Nice+Cannes	France	0.637	0	0	50.844	0	1	0	0	0	0	0	0	0	0	0	0	0	0	0	0	0	0	0	0	0	0	0	0
Stuttgart	West Germany	0.633	0	0	61.505	0	1	0	0	0	0	0	0	0	0	0	0	0	0	0	0	0	0	0	0	0	0	0	0
Accra	Ghana	0.631	5	1	8.597	0	0	0	0	0	0	0	0	0	0	0	0	0	0	0	0	0	0	0	0	0	0	1	0
Taiyuan	China	0.622	0	0	824.788	1	0	0	0	0	0	0	0	0	0	0	0	0	0	0	0	1	0	0	0	0	0	0	0
Liege	Belgium	0.619	0	0	9.632	0	1	0	0	0	0	0	0	0	0	0	0	0	0	0	0	0	0	0	0	0	0	0	0
Hanoi	Viet Nam	0.617	11	1	43.407	1	0	0	0	0	0	0	0	0	0	0	0	0	0	0	0	0	0	1	0	0	0	0	0
Nanchang	China	0.615	0	0	824.788	1	0	0	0	0	0	0	0	0	0	0	0	0	0	0	0	1	0	0	0	0	0	0	0
Dakar	Senegal	0.61	0	1	4.258	0	0	0	0	0	0	0	0	0	0	0	0	0	0	0	0	0	0	0	0	0	0	1	0
La Paz	Bolivia	0.606	0	1	4.506	0	0	0	0	0	0	0	0	0	0	0	0	0	0	0	0	0	0	0	0	0	1	0	0
Jilin	China	0.606	0	0	824.788	1	0	0	0	0	0	0	0	0	0	0	0	0	0	0	0	1	0	0	0	0	0	0	0
Venezia	Italy	0.606	1	0	53.579	0	1	0	0	0	0	0	0	0	0	0	0	0	0	0	0	0	0	0	0	0	0	0	0
Wuxi	China	0.603	0	0	824.788	1	0	0	0	0	0	0	0	0	0	0	0	0	0	0	0	1	0	0	0	0	0	0	0
Qiqihaer	China	0.591	0	0	824.788	1	0	0	0	0	0	0	0	0	0	0	0	0	0	0	0	1	0	0	0	0	0	0	0
Bordeaux	France	0.584	0	0	50.844	0	1	0	0	0	0	0	0	0	0	0	0	0	0	0	0	0	0	0	0	0	0	0	0
Bremen	West Germany	0.582	0	0	61.505	0	1	0	0	0	0	0	0	0	0	0	0	0	0	0	0	0	0	0	0	0	0	0	0
Ottawa	Canada	0.581	0	1	21.453	0	0	0	1	0	0	0	0	0	0	0	0	0	0	0	0	0	0	0	0	0	0	0	0
Urumqhi	China	0.581	0	0	824.788	1	0	0	0	0	0	0	0	0	0	0	0	0	0	0	0	1	0	0	0	0	0	0	0
Bristol	UK	0.578	0	0	55.635	0	1	0	0	0	0	0	0	0	0	0	0	0	0	0	0	0	0	0	0	0	0	0	0
Yichun	China	0.578	0	0	824.788	1	0	0	0	0	0	0	0	0	0	0	0	0	0	0	0	1	0	0	0	0	0	0	0
Krakow	Poland	0.578	1	0	32.636	1	0	0	0	0	0	0	0	1	0	0	0	0	0	0	0	0	0	0	0	0	0	0	0
Leipzig	East Germany	0.577	7	0	17.068	1	0	0	0	0	0	0	0	0	0	0	0	1	0	0	0	0	0	0	0	0	0	0	0
Pretoria	South Africa	0.565	0	1	22.839	0	0	0	0	0	0	0	0	0	0	0	0	0	0	0	0	0	0	0	0	0	0	1	0
Zagreb	Yugoslavia	0.562	0	0	20.215	1	0	0	0	0	0	0	0	0	0	1	0	0	0	0	0	0	0	0	0	0	0	0	0
Xuzhou	China	0.557	0	0	824.788	1	0	0	0	0	0	0	0	0	0	0	0	0	0	0	0	1	0	0	0	0	0	0	0
Bergamo	Italy	0.555	0	0	53.579	0	1	0	0	0	0	0	0	0	0	0	0	0	0	0	0	0	0	0	0	0	0	0	0
Colombo	Sri Lanka	0.554	4	1	12.486	0	0	0	0	0	0	0	0	0	0	0	0	0	0	0	0	0	0	0	0	0	0	0	1
Kuwait City	Kuwait	0.553	0	1	0.747	0	0	0	0	0	0	0	0	0	0	0	0	0	0	0	0	0	0	0	0	0	0	0	1
Asuncion	Paraguay	0.553	0	1	2.474	0	0	0	0	0	0	0	0	0	0	0	0	0	0	0	0	0	0	0	0	0	1	0	0
Lens-Douai	France	0.549	0	0	50.844	0	1	0	0	0	0	0	0	0	0	0	0	0	0	0	0	0	0	0	0	0	0	0	0
Fuzhou	China	0.549	0	0	824.788	1	0	0	0	0	0	0	0	0	0	0	0	0	0	0	0	1	0	0	0	0	0	0	0
Abidjan	Cote d'Ivoire	0.548	0	1	5.242	0	0	0	0	0	0	0	0	0	0	0	0	0	0	0	0	0	0	0	0	0	0	1	0
Thessaloniki	Greece	0.542	0	0	8.66	0	1	0	0	0	0	0	0	0	0	0	0	0	0	0	0	0	0	0	0	0	0	0	0
Sevilla	Spain	0.542	0	0	33.98	0	1	0	0	0	0	0	0	0	0	0	0	0	0	0	0	0	0	0	0	0	0	0	0
Bari	Italy	0.542	0	0	53.579	0	1	0	0	0	0	0	0	0	0	0	0	0	0	0	0	0	0	0	0	0	0	0	0
Nairobi	Kenya	0.531	0	1	11.252	0	0	0	0	0	0	0	0	0	0	0	0	0	0	0	0	0	0	0	0	0	0	1	0
Brasilia	Brazil	0.525	0	1	95.327	0	0	0	0	0	0	0	0	0	0	0	0	0	0	0	0	0	0	0	0	0	1	0	0
Hannover	West Germany	0.524	0	0	61.505	0	1	0	0	0	0	0	0	0	0	0	0	0	0	0	0	0	0	0	0	0	0	0	0
Wroclaw	Poland	0.519	2	0	32.636	1	0	0	0	0	0	0	0	1	0	0	0	0	0	0	0	0	0	0	0	0	0	0	0
Hefei	China	0.518	0	0	824.788	1	0	0	0	0	0	0	0	0	0	0	0	0	0	0	0	1	0	0	0	0	0	0	0
Dresden	East Germany	0.509	3	0	17.068	1	0	0	0	0	0	0	0	0	0	0	0	1	0	0	0	0	0	0	0	0	0	0	0
Huainan	China	0.508	0	0	824.788	1	0	0	0	0	0	0	0	0	0	0	0	0	0	0	0	1	0	0	0	0	0	0	0
Zhengzhou	China	0.508	0	0	824.788	1	0	0	0	0	0	0	0	0	0	0	0	0	0	0	0	1	0	0	0	0	0	0	0
Suzhou	China	0.508	1	0	824.788	1	0	0	0	0	0	0	0	0	0	0	0	0	0	0	0	1	0	0	0	0	0	0	0
Helsinki	Finland	0.507	26	1	4.612	0	0	0	0	0	0	0	1	0	0	0	0	0	0	0	0	0	0	0	0	0	0	0	0
Benxi	China	0.505	0	0	824.788	1	0	0	0	0	0	0	0	0	0	0	0	0	0	0	0	1	0	0	0	0	0	0	0
Padova	Italy	0.504	0	0	53.579	0	1	0	0	0	0	0	0	0	0	0	0	0	0	0	0	0	0	0	0	0	0	0	0
Quito	Ecuador	0.501	0	1	6.073	0	0	0	0	0	0	0	0	0	0	0	0	0	0	0	0	0	0	0	0	0	1	0	0
San Salvador	El Salvador	0.5	0	1	3.669	0	0	0	0	0	0	0	0	0	0	0	0	0	0	0	0	0	0	0	0	0	1	0	0
Gotheborg	Sweden	0.5	0	0	8.055	0	1	0	0	0	0	0	0	0	0	0	0	0	0	0	0	0	0	0	0	0	0	0	0
Poznan	Poland	0.466	1	0	32.636	1	0	0	0	0	0	0	0	1	0	0	0	0	0	0	0	0	0	0	0	0	0	0	0
Hamhung	North Korea	0.451	0	0	14.41	1	0	0	0	0	0	0	0	0	0	0	0	0	0	0	0	0	1	0	0	0	0	0	0
Gdansk	Poland	0.36	2	0	32.636	1	0	0	0	0	0	0	0	1	0	0	0	0	0	0	0	0	0	0	0	0	0	0	0
Szczecin	Poland	0.334	0	0	32.636	1	0	0	0	0	0	0	0	1	0	0	0	0	0	0	0	0	0	0	0	0	0	0	0
Brno	Czechoslovakia	0.333	2	0	14.357	1	0	0	0	0	0	0	0	0	1	0	0	0	0	0	0	0	0	0	0	0	0	0	0
Katowice	Poland	0.305	1	0	32.636	1	0	0	0	0	0	0	0	1	0	0	0	0	0	0	0	0	0	0	0	0	0	0	0
Chongjin	North Korea	0.303	1	0	14.41	1	0	0	0	0	0	0	0	0	0	0	0	0	0	0	0	0	1	0	0	0	0	0	0
Skopje	Yugoslavia	0.302	0	0	20.215	1	0	0	0	0	0	0	0	0	0	1	0	0	0	0	0	0	0	0	0	0	0	0	0
Chemnitz/Karl-Marx-Stadt	East Germany	0.299	0	0	17.068	1	0	0	0	0	0	0	0	0	0	0	0	1	0	0	0	0	0	0	0	0	0	0	0
Ulaanbaatar	Mongolia	0.298	4	1	1.279	1	0	0	0	0	0	0	0	0	0	0	0	0	0	0	0	0	0	0	1	0	0	0	0
Ostrava	Czechoslovakia	0.297	0	0	14.357	1	0	0	0	0	0	0	0	0	1	0	0	0	0	0	0	0	0	0	0	0	0	0	0
Bern	Switzerland	0.282	0	1	6.169	0	1	0	0	0	0	0	0	0	0	0	0	0	0	0	0	0	0	0	0	0	0	0	0
Bratislava	Czechoslovakia	0.282	8	0	14.357	1	0	0	0	0	0	0	0	0	1	0	0	0	0	0	0	0	0	0	0	0	0	0	0
Bydgoszcz	Poland	0.278	0	0	32.636	1	0	0	0	0	0	0	0	1	0	0	0	0	0	0	0	0	0	0	0	0	0	0	0
Bonn	West Germany	0.275	6	1	61.505	0	1	0	0	0	0	0	0	0	0	0	0	0	0	0	0	0	0	0	0	0	0	0	0
Magdeburg	East Germany	0.272	0	0	17.068	1	0	0	0	0	0	0	0	0	0	0	0	1	0	0	0	0	0	0	0	0	0	0	0
Haiphong	Viet Nam	0.267	2	0	43.407	1	0	0	0	0	0	0	0	0	0	0	0	0	0	0	0	0	0	1	0	0	0	0	0
Halle	East Germany	0.257	1	0	17.068	1	0	0	0	0	0	0	0	0	0	0	0	1	0	0	0	0	0	0	0	0	0	0	0
Plovdiv	Bulgaria	0.255	0	0	8.507	1	0	0	0	0	0	0	0	0	0	0	0	0	1	0	0	0	0	0	0	0	0	0	0
Graz	Austria	0.249	0	0	7.516	0	0	0	0	0	0	1	0	0	0	0	0	0	0	0	0	0	0	0	0	0	0	0	0
Sarajevo	Yugoslavia	0.238	1	0	20.215	1	0	0	0	0	0	0	0	0	0	1	0	0	0	0	0	0	0	0	0	0	0	0	0
Lublin	Poland	0.233	1	0	32.636	1	0	0	0	0	0	0	0	1	0	0	0	0	0	0	0	0	0	0	0	0	0	0	0
Cluj-Napoca	Romania	0.213	1	0	20.549	1	0	0	0	0	0	0	0	0	0	0	0	0	0	0	1	0	0	0	0	0	0	0	0
Varna	Bulgaria	0.21	2	0	8.507	1	0	0	0	0	0	0	0	0	0	0	0	0	1	0	0	0	0	0	0	0	0	0	0
Timisoara	Romania	0.207	0	0	20.549	1	0	0	0	0	0	0	0	0	0	0	0	0	0	0	1	0	0	0	0	0	0	0	0
Iasi	Romania	0.207	0	0	20.549	1	0	0	0	0	0	0	0	0	0	0	0	0	0	0	1	0	0	0	0	0	0	0	0
Linz	Austria	0.205	0	0	7.516	0	0	0	0	0	0	1	0	0	0	0	0	0	0	0	0	0	0	0	0	0	0	0	0
Rostock	East Germany	0.199	1	0	17.068	1	0	0	0	0	0	0	0	0	0	0	0	1	0	0	0	0	0	0	0	0	0	0	0
Erfurt	East Germany	0.198	0	0	17.068	1	0	0	0	0	0	0	0	0	0	0	0	1	0	0	0	0	0	0	0	0	0	0	0
Zabre	Poland	0.198	0	0	32.636	1	0	0	0	0	0	0	0	1	0	0	0	0	0	0	0	0	0	0	0	0	0	0	0
Constanta	Romania	0.198	1	0	20.549	1	0	0	0	0	0	0	0	0	0	0	0	0	0	0	1	0	0	0	0	0	0	0	0
Gdynia	Poland	0.192	0	0	32.636	1	0	0	0	0	0	0	0	1	0	0	0	0	0	0	0	0	0	0	0	0	0	0	0
Galati	Romania	0.19	0	0	20.549	1	0	0	0	0	0	0	0	0	0	0	0	0	0	0	1	0	0	0	0	0	0	0	0
Czestochowa	Poland	0.188	0	0	32.636	1	0	0	0	0	0	0	0	1	0	0	0	0	0	0	0	0	0	0	0	0	0	0	0
Bytom	Poland	0.187	0	0	32.636	1	0	0	0	0	0	0	0	1	0	0	0	0	0	0	0	0	0	0	0	0	0	0	0
Brasov	Romania	0.182	0	0	20.549	1	0	0	0	0	0	0	0	0	0	0	0	0	0	0	1	0	0	0	0	0	0	0	0
Miskolc	Hungary	0.181	0	0	10.366	1	0	0	0	0	0	0	0	0	0	0	1	0	0	0	0	0	0	0	0	0	0	0	0
Craiova	Romania	0.181	0	0	20.549	1	0	0	0	0	0	0	0	0	0	0	0	0	0	0	1	0	0	0	0	0	0	0	0
Ljubljana	Yugoslavia	0.174	3	0	20.215	1	0	0	0	0	0	0	0	0	0	1	0	0	0	0	0	0	0	0	0	0	0	0	0
Gliwice	Poland	0.172	0	0	32.636	1	0	0	0	0	0	0	0	1	0	0	0	0	0	0	0	0	0	0	0	0	0	0	0
Ploiesti	Romania	0.17	0	0	20.549	1	0	0	0	0	0	0	0	0	0	0	0	0	0	0	1	0	0	0	0	0	0	0	0
Debrecen	Hungary	0.168	0	0	10.366	1	0	0	0	0	0	0	0	0	0	0	1	0	0	0	0	0	0	0	0	0	0	0	0
Bialystok	Poland	0.168	0	0	32.636	1	0	0	0	0	0	0	0	1	0	0	0	0	0	0	0	0	0	0	0	0	0	0	0
Braila	Romania	0.164	0	0	20.549	1	0	0	0	0	0	0	0	0	0	0	0	0	0	0	1	0	0	0	0	0	0	0	0
Radom	Poland	0.159	0	0	32.636	1	0	0	0	0	0	0	0	1	0	0	0	0	0	0	0	0	0	0	0	0	0	0	0
Tirana	Albania	0.157	5	1	2.151	1	0	0	0	0	0	0	0	0	0	0	0	0	0	1	0	0	0	0	0	0	0	0	0
Plzen	Czechoslovakia	0.154	0	0	14.357	1	0	0	0	0	0	0	0	0	1	0	0	0	0	0	0	0	0	0	0	0	0	0	0
Tampere	Finland	0.154	1	0	4.612	0	0	0	0	0	0	0	1	0	0	0	0	0	0	0	0	0	0	0	0	0	0	0	0
Turku	Finland	0.152	0	0	4.612	0	0	0	0	0	0	0	1	0	0	0	0	0	0	0	0	0	0	0	0	0	0	0	0
Chorzow	Poland	0.152	0	0	32.636	1	0	0	0	0	0	0	0	1	0	0	0	0	0	0	0	0	0	0	0	0	0	0	0
Kosice	Czechoslovakia	0.15	0	0	14.357	1	0	0	0	0	0	0	0	0	1	0	0	0	0	0	0	0	0	0	0	0	0	0	0
Pecs	Hungary	0.149	0	0	10.366	1	0	0	0	0	0	0	0	0	0	0	1	0	0	0	0	0	0	0	0	0	0	0	0
Arad	Romania	0.146	0	0	20.549	1	0	0	0	0	0	0	0	0	0	0	0	0	0	0	1	0	0	0	0	0	0	0	0
Szeged	Hungary	0.145	0	0	10.366	1	0	0	0	0	0	0	0	0	0	0	1	0	0	0	0	0	0	0	0	0	0	0	0
Sosnowiec	Poland	0.145	0	0	32.636	1	0	0	0	0	0	0	0	1	0	0	0	0	0	0	0	0	0	0	0	0	0	0	0
Ruse	Bulgaria	0.144	0	0	8.507	1	0	0	0	0	0	0	0	0	0	0	0	0	1	0	0	0	0	0	0	0	0	0	0
Oradea	Romania	0.144	0	0	20.549	1	0	0	0	0	0	0	0	0	0	0	0	0	0	0	1	0	0	0	0	0	0	0	0
Ruda Slaska	Poland	0.142	0	0	32.636	1	0	0	0	0	0	0	0	1	0	0	0	0	0	0	0	0	0	0	0	0	0	0	0
Novi Sad	Yugoslavia	0.141	0	0	20.215	1	0	0	0	0	0	0	0	0	0	1	0	0	0	0	0	0	0	0	0	0	0	0	0
Torun	Poland	0.13	0	0	32.636	1	0	0	0	0	0	0	0	1	0	0	0	0	0	0	0	0	0	0	0	0	0	0	0
Salzburg	Austria	0.13	2	0	7.516	0	0	0	0	0	0	1	0	0	0	0	0	0	0	0	0	0	0	0	0	0	0	0	0
Split	Yugoslavia	0.129	0	0	20.215	1	0	0	0	0	0	0	0	0	0	1	0	0	0	0	0	0	0	0	0	0	0	0	0
Rijeka	Yugoslavia	0.129	0	0	20.215	1	0	0	0	0	0	0	0	0	0	1	0	0	0	0	0	0	0	0	0	0	0	0	0
Nis	Yugoslavia	0.128	0	0	20.215	1	0	0	0	0	0	0	0	0	0	1	0	0	0	0	0	0	0	0	0	0	0	0	0
Sibiu	Romania	0.128	0	0	20.549	1	0	0	0	0	0	0	0	0	0	0	0	0	0	0	1	0	0	0	0	0	0	0	0
Kielce	Poland	0.127	0	0	32.636	1	0	0	0	0	0	0	0	1	0	0	0	0	0	0	0	0	0	0	0	0	0	0	0
Burgas	Bulgaria	0.125	0	0	8.507	1	0	0	0	0	0	0	0	0	0	0	0	0	1	0	0	0	0	0	0	0	0	0	0
Zwickau	East Germany	0.125	0	0	17.068	1	0	0	0	0	0	0	0	0	0	0	0	1	0	0	0	0	0	0	0	0	0	0	0
Walbrzych	Poland	0.125	0	0	32.636	1	0	0	0	0	0	0	0	1	0	0	0	0	0	0	0	0	0	0	0	0	0	0	0
Potsdam	East Germany	0.119	0	0	17.068	1	0	0	0	0	0	0	0	0	0	0	0	1	0	0	0	0	0	0	0	0	0	0	0
Gera	East Germany	0.117	0	0	17.068	1	0	0	0	0	0	0	0	0	0	0	0	1	0	0	0	0	0	0	0	0	0	0	0
Innsbruck	Austria	0.116	2	0	7.516	0	0	0	0	0	0	1	0	0	0	0	0	0	0	0	0	0	0	0	0	0	0	0	0
Kragujevac	Yugoslavia	0.112	0	0	20.215	1	0	0	0	0	0	0	0	0	0	1	0	0	0	0	0	0	0	0	0	0	0	0	0
Osijek	Yugoslavia	0.109	0	0	20.215	1	0	0	0	0	0	0	0	0	0	1	0	0	0	0	0	0	0	0	0	0	0	0	0
Bielsko-Biala	Poland	0.106	0	0	32.636	1	0	0	0	0	0	0	0	1	0	0	0	0	0	0	0	0	0	0	0	0	0	0	0
Pristina	Yugoslavia	0.105	0	0	20.215	1	0	0	0	0	0	0	0	0	0	1	0	0	0	0	0	0	0	0	0	0	0	0	0
Targu Mures	Romania	0.105	0	0	20.549	1	0	0	0	0	0	0	0	0	0	0	0	0	0	0	1	0	0	0	0	0	0	0	0
Gyor	Hungary	0.103	0	0	10.366	1	0	0	0	0	0	0	0	0	0	0	1	0	0	0	0	0	0	0	0	0	0	0	0
Stara Zagora	Bulgaria	0.101	0	0	8.507	1	0	0	0	0	0	0	0	0	0	0	0	0	1	0	0	0	0	0	0	0	0	0	0
Schwerin	East Germany	0.101	0	0	17.068	1	0	0	0	0	0	0	0	0	0	0	0	1	0	0	0	0	0	0	0	0	0	0	0
			792	74		128	62	25	4	2	7	5	3	24	6	12	6	12	6	1	14	39	3	3	1	1	23	18	33

## Sheet: Seed georegions
Country group	Is socialist	# cities	Condition for inclusion	Can be merged with	Geographical group in the optimized model
Poland	+	24	> 0.1 mln	all other socialist countries	Socialist II
Czechoslovakia	+	6	> 0.1 mln	all other socialist countries	Socialist I
Yugoslavia	+	12	> 0.1 mln	all other socialist countries	Socialist III
Hungary	+	6	> 0.1 mln	all other socialist countries	Socialist II
East Germany	+	12	> 0.1 mln	all other socialist countries	Socialist II
Bulgaria	+	6	> 0.1 mln	all other socialist countries	Socialist I
Albania	+	1	> 0.1 mln	all other socialist countries	Socialist I
Romania	+	14	> 0.1 mln	all other socialist countries	Socialist III
China	+	39	> 0.5 mln	all other socialist countries, Asia	Third world
North Korea	+	3	> 0.25 mln	all other socialist countries, Asia	Socialist III
Viet Nam	+	3	> 0.25 mln	all other socialist countries, Asia	Socialist III
Mongolia	+	1	> 0.25 mln	all other socialist countries, Asia	Socialist I
Cuba	+	1	> 0.25 mln	all other socialist countries, Latin America	Socialist III
West Europe (non-socialist, except Austria and Finland)	-	62	> 0.5 mln, > 0.25 mln for capital cities	Austria, Finland, USA, Canada, Australia	Capitalist II
USA	-	25	> 1 mln, > 0.5 mln for capital cities	West Europe, Canada, Australia, Japan, Latin America	Capitalist III
Canada	-	4	> 1 mln, > 0.5 mln for capital cities	West Europe, USA, Australia, Japan	Capitalist III
Australia	-	2	> 1 mln, > 0.5 mln for capital cities	West Europe, USA, Canada, Japan	Capitalist III
Japan	-	7	> 1 mln, > 0.5 mln for capital cities	Asia, USA, Canada, Australia	Third world
Austria	-	5	> 0.1 mln	Finland, West Europe	Capitalist I
Finland	-	3	> 0.1 mln	Austria, West Europe	Capitalist I
Latin America (except Cuba)	-	23	> 1 mln, > 0.5 mln for capital cities	USA, Africa, Asia	Third world
Africa	-	18	> 1 mln, > 0.5 mln for capital cities	Latin America, Asia	Third world
Asia (non-socialist, except Japan)	-	33	> 1 mln, > 0.5 mln for capital cities	Latin America, Africa, China, Japan	Third world

## Sheet: Model_optimization_log
Cities >1mln		135 cities
Population only		cost function	a	pm	c	pm
		-921.1	0.49	0.11	2.74	0.37
Population-capital-socialist		cost function					capit						soc
		-434.41	0.51	0.13	0.45	0.35..0.58	2.23	9.29987	2.005	2.47	7.42609	11.8224	1.68	5.36556	1.505	1.865	4.50415	6.45594
Full model 135 cities			a	b	capit		weu	usa	can	aus	jap	aut	pol	cz	hun	gdr	rom	chi	vie	cub	lam	afr	asia
		-189.78	1.33	0.43	0.35		0.246577	-0.328145	-0.0490013	0.481581	-1.65942	2.8896	2.86432	3.15541	2.34566	2.29647	1.79968	-0.834154	1.32504	1.94876	-1.38646	-0.720071	-1.19258
							22	25	3	2	7	1	1	1	1	1	1	14	1	1	16	10	28
Enriched dataset		310 cities
Population only		cost function	a	pm	c	pm
		-1298.5	0.64	0.07	2.25	0.18
Population-capital-socialist		cost function					capit						soc
		-707.94	0.67	0.07	0.35	0.07	2.31	10.0744	2.135	2.49	8.45705	12.0613	1.605	4.97786	1.45	1.767	4.26311	5.85327
Full model			c	a	b	capit	weu	usa	can	aus	jap	aut	fin	pol	cz	yug	hun	gdr	bul	alb	rom	chi	nk	vie	mon	cub	lam	afr	asia
Iteration I		-351.12	0.348	1.28	0.555	0.12	0.610038	-0.00152338	-0.244767	0.789932	-1.19455	3.22224	3.7135	2.70734	3.34424	1.68199	2.59205	2.69342	3.10786	3.48941	1.91376	-0.890591	2.11743	1.61609	3.10041	2.26552	-1.04907	-0.178012	-0.852801
remove capit		-351.25	0.348	1.29	0.585		0.646769	-0.0401391	-0.245508	0.773858	-1.17501	3.28351	3.77311	2.72626	3.38137	1.7085	2.64744	2.73928	3.15713	3.55869	1.94549	-0.935099	2.15555	1.60529	3.1938	2.32654	-1.02189	-0.152872	-0.859963
		accepted					62	25	4	2	7	5	3	24	6	12	6	12	6	1	14	39	3	3	1	1	23	18	33
Mongolia+Bulgaria		-351.28	accepted
Albania+CSSR		-351.56	accepted
Albania+MongoBulgaria		-351.98
Cuba+N.Korea		-351.83	accepted
Cuba+Hungary		-352.42
Australia+USA		-352.95
Australia+Canada		-352.77	accepted
Australia+Asia		-355.88
Vietnam+Yugoslavia		-353.02	accepted
Vietnam+Romania		-353.53
Vietnam+Cuba/Nkorea		-355.69
Finland+Austria		-355	accepted
Finland+W.Europe		-406.04
			c	a	b		weu	usa	can	jap	aut	pol	cz	yug	hun	gdr	bul	rom	chi	nk	lam	afr	asia
Iteration II		-355	0.348	1.28	0.588		0.653429	-0.0242639	0.238151	-1.14814	3.40758	2.71383	3.40331	1.69726	2.64776	2.74407	3.17654	1.93863	-0.933972	2.1494	-1.01343	-0.15635	-0.857008
							62	25	6	7	8	24	7	15	6	12	7	14	39	4	23	18	33
Romania+NK/Cuba		-355.68	accepted
Hungary+NK/Cuba		-356.89
Canada/Australia+USA		-355.8	accepted
Canada/Australia+W.Europe		-356.33
CSSR+Bulgaria		-356.76	accepted
Japan+Asia		-357.25	accepted
Japan+USA		-368.09
Austria/Finland+W.Europe		-473.66	not accepted
Hungary+GDR		-357.39
Hungary+Poland		-357.26	accepted
Hungary+Romania		-360.69
			c	a	b		weu	usa	aut	pol-hun	good	yug	gdr	rom	chi	lam	afr	asia
Iteration III		-357.26	0.348	1.255	0.601		0.65946	0.0312222	3.40081	2.67766	3.26007	1.6535	2.74905	2.10403	-0.948808	-0.999806	-0.178231	-0.967956
							62	31	8	30	14	15	12	18	39	23	18	40
GDR+good socialist		-362.9
GDR+Poland/Hungary		-357.42	accepted
GDR+Romania		-364.89
Good Socialist+Poland		-367.39	not accepted		exp(delta)=5e-5
Yugoslavia+Romania		-360.29	accepted		exp(delta)=0.06
Africa+Lam		-364.7	accepted		exp(delta)=0.012
Africa+Asia		-365.06
Iteration IV			c	a	b		weu	usa	aut	medium	good	bad	chi	lam	asia
		-364.7	0.348	1.248	0.602		0.662118	0.0307035	3.4018	2.69952	3.25485	1.89848	-0.946136	-0.664909	-0.959681
							62	31	8	42	14	33	39	41	40
USA+W.Europe		-375.22	not accepted
bad+medium socialist		-395.8	not accepted
China+Asia		-364.75	accepted
Asia+Lam		-365.76	accepted
Iteration V			c	a	b		weu	usa	aut	medium	good	bad	3rd
		-365.76	0.348	1.247	0.598		0.661339	0.0528009	3.40971	2.70738	3.26587	1.9083	-0.853431
							62	31	8	42	14	33	120
							4.54837	2.47498	71.0327	35.1917	61.5162	15.8272	1

## Sheet: Model_confidence_intervals
	optimal	compared to		p-value	0.05_min	0.05_max	av_boost	min_boost	max_boost
a	1.258	1	-382.81	6.10789e-09	1.143	1.32
b	0.602	0	-577.92	0	0.54	0.65
		a	-454.25	0
		a/2	-365.94	0.806496
c	0.141				0.118	0.196
Good socialist	4.159	0			3.77	4.401	64.0075	43.3801	81.5324
Medium socialist	3.599	0			3.283	3.81	36.5617	26.6556	45.1504
Bad socialist	2.805	0	-495.94	0	2.41	3.06	16.5271	11.134	21.3276
Austria-Finland	4.298	0	-576.2	0	3.92	4.57	73.5525	50.4004	96.5441
W.Europe	1.556	0	-439.89	0	1.25	1.77	4.73982	3.49034	5.87085
USA, Canada, Australia	0.923	0	-380.34	7.78032e-08	0.565	1.16	2.51683	1.75945	3.18993
value	-365.91

## Sheet: Model_expectations
City	Country	Pop, 1970	Mentions	Capital	Population	expected	log_pval	Pval
Accra	Ghana	0.631	5	1	8.597	0.381613	-9.22762	9.82869e-05
Hiroshima	Japan	1.379	4	0	104.926	0.211929	-8.85986	0.000141975
Santiago	Chile	2.647	7	1	9.564	1.04303	-8.44281	0.000215444
New York	USA	16.191	29	0	209.588	11.8381	-7.99686	0.000336518
Madrid	Spain	3.521	2	1	33.98	12.8113	-7.55511	0.000523429
Stockholm	Sweden	1.096	10	1	8.055	2.50382	-7.4852	0.000561331
Hamburg	West Germany	1.792	7	0	61.505	1.3994	-6.6914	0.00124154
Bratislava	Czechoslovakia	0.282	8	0	14.357	1.84009	-6.65029	0.00129365
Colombo	Sri Lanka	0.554	4	1	12.486	0.438594	-6.12987	0.00217686
Cairo	Egypt	5.585	11	1	35.046	3.72059	-5.7194	0.00328168
Ljubljana	Yugoslavia	0.174	3	0	20.215	0.258919	-5.34525	0.00477076
Brussels	Belgium	1.568	10	1	9.632	3.52731	-4.96243	0.00699591
Los Angeles	USA	8.378	0	0	209.588	5.16693	-4.47379	0.011404
Frankfurt	West Germany	0.669	3	0	61.505	0.405031	-4.11062	0.0163976
Southampton-Portsmouth	UK	0.745	3	0	55.635	0.463757	-3.74748	0.0235771
Chicago	USA	7.106	0	0	209.588	4.19994	-3.50679	0.029993
Changchun	China	1.255	2	0	824.788	0.188234	-3.46463	0.0312846
Leipzig	East Germany	0.577	7	0	17.068	2.58894	-3.39203	0.0336403
Beirut	Lebanon	0.923	2	1	2.297	0.221355	-3.16217	0.0423338
Melbourne	Australia	2.499	4	0	12.843	1.12756	-2.88866	0.0556507
San Francisco	USA	2.529	4	0	209.588	1.14462	-2.84168	0.0583276
London	UK	7.509	19	1	55.635	28.3395	-2.47501	0.0841621
Shanghai	China	6.052	4	0	824.788	1.36288	-2.31004	0.0992573
Addis Ababa	Ethiopia	0.729	3	1	28.415	0.86151	-2.17737	0.113339
Dortmund	West Germany	0.639	2	0	61.505	0.38231	-2.17379	0.113746
Suzhou	China	0.508	1	0	824.788	0.0603187	-2.14497	0.117072
Chongqing	China	2.237	2	0	824.788	0.389554	-2.14092	0.117547
Baghdad	Iraq	2.07	3	1	9.918	0.907179	-2.05504	0.128088
Warsaw	Poland	1.3	64	1	32.636	50.0553	-2.00519	0.134635
Munich	West Germany	1.294	3	0	61.505	0.928988	-1.99932	0.135427
Phnom Penh	Cambodia	0.9	2	1	6.995	0.425561	-1.98728	0.137068
Bangkok	Thailand	3.11	0	1	36.885	2.61252	-1.91937	0.146699
Haiphong	Viet Nam	0.267	2	0	43.407	0.443777	-1.91514	0.147321
Florence	Italy	0.721	2	0	53.579	0.445036	-1.91028	0.148039
Helsinki	Finland	0.507	26	1	4.612	16.7093	-1.77952	0.168719
Rome	Italy	3.135	10	1	53.579	15.614	-1.69781	0.183084
Paris	France	8.208	39	1	50.844	28.4598	-1.65211	0.191645
Cologne	West Germany	0.849	2	0	61.505	0.546641	-1.56386	0.209327
Hanoi	Viet Nam	0.617	11	1	43.407	16.4695	-1.55715	0.210736
Oslo	Norway	0.643	3	1	3.876	1.13597	-1.54241	0.213865
Montreal	Canada	2.684	3	0	21.453	1.23358	-1.36355	0.255751
Manchester	UK	2.396	0	0	55.635	2.01688	-1.32373	0.266141
Detroit	USA	3.966	0	0	209.588	2.01624	-1.3231	0.266308
Bonn	West Germany	0.275	6	1	61.505	3.43344	-1.31889	0.267432
Lagos	Nigeria	1.414	0	1	55.981	2.00163	-1.30849	0.270228
Rotterdam	Netherlands	0.967	2	0	13.002	0.643904	-1.29785	0.273118
Birmingham	UK	2.37	0	0	55.635	1.98938	-1.29623	0.273561
Havana	Cuba	1.779	20	1	8.715	12.5584	-1.28571	0.276454
Ostrava	Czechoslovakia	0.297	0	0	14.357	1.96409	-1.27094	0.280568
Seoul	South Korea	5.312	1	1	32.209	3.42184	-1.24214	0.288766
Jakarta	Indonesia	3.915	3	1	114.835	6.01912	-1.20727	0.299012
Innsbruck	Austria	0.116	2	0	7.516	0.691577	-1.18494	0.305765
Bandung	Indonesia	1.17	1	0	114.835	0.172335	-1.1501	0.316605
Turin	Italy	1.76	3	0	53.579	1.36803	-1.14677	0.317661
São Paulo	Brazil	7.62	0	0	95.327	1.82122	-1.12807	0.323657
Graz	Austria	0.249	0	0	7.516	1.80834	-1.1152	0.32785
Bombay	India	6.413	3	0	553.579	1.46596	-1.00699	0.365317
Dhaka	Pakistan	1.374	1	0	123.139	0.210962	-0.966556	0.380391
Salzburg	Austria	0.13	2	0	7.516	0.798196	-0.964643	0.381119
Plovdiv	Bulgaria	0.255	0	0	8.507	1.62121	-0.928063	0.395319
Bogota	Colombia	2.383	0	1	22.061	1.6099	-0.916756	0.399814
Amsterdam	Netherlands	0.927	1	1	13.002	2.99231	-0.91479	0.400601
Naples	Italy	2	0	0	53.579	1.60677	-0.913626	0.401067
Johannesburg	South Africa	1.443	1	0	22.839	0.224379	-0.911365	0.401975
Marseille	France	1.182	2	0	50.844	0.828965	-0.908048	0.403311
Ottawa	Canada	0.581	0	1	21.453	1.57815	-0.885	0.412714
Rangun	Myanmar	1.946	3	1	26.381	1.56958	-0.873177	0.417623
Casablanca	Morocco	1.505	1	0	16	0.236577	-0.864293	0.421349
Boston	USA	3.187	0	0	209.588	1.53122	-0.838075	0.432542
Nagoya	Japan	6.603	0	0	104.926	1.52082	-0.827671	0.437066
Manila	Philippines	3.534	1	1	35.805	2.79082	-0.765088	0.465293
Ankara	Turkey	1.341	0	1	34.876	1.45407	-0.760922	0.467235
Brasilia	Brazil	0.525	0	1	95.327	1.43892	-0.745769	0.474369
Santo Domingo	Dominican Rep	0.687	1	1	4.503	0.273427	-0.737174	0.478464
Belgrade	Yugoslavia	0.878	10	1	20.215	13.1074	-0.723308	0.485145
Linz	Austria	0.205	0	0	7.516	1.41586	-0.722714	0.485433
Chengdu	China	1.75	1	0	824.788	0.286019	-0.698154	0.497503
Vienna	Austria	1.621	43	1	7.516	48.0825	-0.65886	0.517441
Glasgow	UK	1.734	0	0	55.635	1.34265	-0.649501	0.522306
Constanta	Romania	0.198	1	0	20.549	0.304632	-0.643956	0.525211
Leeds	UK	1.726	0	0	55.635	1.33486	-0.641711	0.526391
Krakow	Poland	0.578	1	0	32.636	2.59459	-0.62201	0.536864
Pyongyang	North Korea	0.987	14	1	14.41	11.5453	-0.610623	0.543012
Szczecin	Poland	0.334	0	0	32.636	1.30124	-0.608093	0.544388
Cluj-Napoca	Romania	0.213	1	0	20.549	0.333951	-0.565946	0.567823
Alexandria	Egypt	1.987	1	0	35.046	0.335586	-0.561835	0.570162
Lodz	Poland	0.759	2	0	32.636	3.65549	-0.534292	0.586084
Lisbon	Portugal	1.817	2	1	8.702	3.65532	-0.534188	0.586145
Venezia	Italy	0.606	1	0	53.579	0.357634	-0.508592	0.601342
San Jose	USA	1.009	1	0	209.588	0.360175	-0.502705	0.604892
Toronto	Canada	2.535	0	0	21.453	1.14804	-0.454888	0.634519
Sarajevo	Yugoslavia	0.238	1	0	20.215	0.384	-0.449829	0.637737
Berlin	East Germany	3.206	62	1	17.068	61.2886	-0.444054	0.641431
Zagreb	Yugoslavia	0.562	0	0	20.215	1.13211	-0.438963	0.644705
Chemnitz/Karl-Marx-Stadt	East Germany	0.299	0	0	17.068	1.13204	-0.438896	0.644748
Tehran	Iran	3.29	1	1	28.514	2.32178	-0.428129	0.651727
Prague	Czechoslovakia	1.076	51	1	14.357	47.1912	-0.425934	0.653159
Duesseldorf	West Germany	0.663	1	0	61.505	0.400465	-0.415541	0.659983
Dublin	Ireland	0.771	0	1	2.95	1.08585	-0.392705	0.675228
Tokyo	Japan	23.298	16	1	104.926	18.3845	-0.380344	0.683626
Athens	Greece	2.485	3	1	8.66	4.47635	-0.367299	0.692603
The Hague	Netherlands	0.708	1	0	13.002	0.434963	-0.348959	0.705422
Beijing	China	4.426	19	1	824.788	21.3722	-0.345037	0.708194
Bydgoszcz	Poland	0.278	0	0	32.636	1.03292	-0.339772	0.711933
Ho Chi Minh City	Viet Nam	1.97	4	0	43.407	5.48705	-0.329783	0.71908
Varna	Bulgaria	0.21	2	0	8.507	1.2698	-0.321745	0.724883
Osaka	Japan	15.278	3	0	104.926	4.37037	-0.315709	0.729272
Magdeburg	East Germany	0.272	0	0	17.068	1.00495	-0.311799	0.732129
Caracas	Venezuela	2.06	0	1	11.588	0.993087	-0.29994	0.740863
Palermo	Italy	0.751	1	0	53.579	0.468461	-0.290258	0.748071
Barcelona	Spain	3.482	2	0	33.98	3.22819	-0.290214	0.748103
Turku	Finland	0.152	0	0	4.612	0.971741	-0.278594	0.756847
Dresden	East Germany	0.509	3	0	17.068	2.21104	-0.273795	0.760488
Miami	USA	2.141	0	0	209.588	0.928202	-0.235055	0.790527
Istanbul	Turkey	2.772	1	0	34.876	0.510214	-0.224062	0.799266
Liverpool	UK	1.276	0	0	55.635	0.912756	-0.219609	0.802833
Chongjin	North Korea	0.303	1	0	14.41	0.520339	-0.20904	0.811363
Kinshasa	Zaire	1.07	0	1	20.01	0.897444	-0.204297	0.81522
Khartoum	Sudan	0.657	1	1	13.93	0.523943	-0.203785	0.815638
Poznan	Poland	0.466	1	0	32.636	1.97862	-0.19401	0.82365
Bern	Switzerland	0.282	0	1	6.169	0.87466	-0.181513	0.834007
Gdansk	Poland	0.36	2	0	32.636	1.42996	-0.178014	0.836931
Tirana	Albania	0.157	5	1	2.151	4.25522	-0.172226	0.841789
Dallas	USA	2.025	0	0	209.588	0.865369	-0.172222	0.841792
Plzen	Czechoslovakia	0.154	0	0	14.357	0.859489	-0.166342	0.846757
Hamhung	North Korea	0.451	0	0	14.41	0.858308	-0.16516	0.847758
Sofia	Bulgaria	0.888	29	1	8.507	30.3613	-0.148417	0.862072
Kosice	Czechoslovakia	0.15	0	0	14.357	0.831493	-0.138346	0.870797
Budapest	Hungary	1.946	34	1	10.366	32.7113	-0.137513	0.871523
Kitakyushu-Fukuoka	Japan	4.072	0	0	104.926	0.827774	-0.134627	0.874042
Cleveland	USA	1.954	0	0	209.588	0.827364	-0.134217	0.8744
Karachi	Pakistan	3.119	1	0	123.139	0.591843	-0.112735	0.893387
Ruse	Bulgaria	0.144	0	0	8.507	0.789859	-0.0967123	0.907817
St Louis	USA	1.882	0	0	209.588	0.789187	-0.0960394	0.908428
Buenos Aires	Argentina	8.416	3	1	23.973	3.87497	-0.0871475	0.916542
Lyon	France	1.116	0	0	50.844	0.771147	-0.0779993	0.924965
Pittsburgh	USA	1.845	0	0	209.588	0.769713	-0.0765658	0.926292
Rio de Janeiro	Brazil	6.791	2	0	95.327	1.5755	-0.0680224	0.93424
Ulaanbaatar	Mongolia	0.298	4	1	1.279	4.73976	-0.0257715	0.974558
Rostock	East Germany	0.199	1	0	17.068	0.678215	-0.0151587	0.984956
Minneapolis	USA	1.706	0	0	209.588	0.697467	-0.00431995	0.995689
Houston	USA	1.693	0	0	209.588	0.690786	0.00236124	1.00236
Milan	Italy	3.017	3	0	53.579	2.6954	0.0104425	1.0105
Erfurt	East Germany	0.198	0	0	17.068	0.673929	0.0192181	1.0194
Zabre	Poland	0.198	0	0	32.636	0.673929	0.0192181	1.0194
Burgas	Bulgaria	0.125	0	0	8.507	0.661032	0.0321154	1.03264
Hong Kong	Hong Kong	3.398	0	0	3.873	0.659214	0.033933	1.03452
Calcutta	India	7.329	2	0	553.579	1.73414	0.03398	1.03456
Gdynia	Poland	0.192	0	0	32.636	0.648333	0.0448144	1.04583
Tianjin	China	3.318	0	0	824.788	0.639745	0.0534026	1.05485
Pretoria	South Africa	0.565	0	1	22.839	0.639005	0.0541426	1.05564
Czestochowa	Poland	0.188	0	0	32.636	0.631383	0.0617646	1.06371
Bytom	Poland	0.187	0	0	32.636	0.627159	0.0659877	1.06821
Seattle	USA	1.556	0	0	209.588	0.621197	0.0719507	1.0746
Baltimore	USA	1.555	0	0	209.588	0.620694	0.072453	1.07514
Porto	Portugal	0.924	0	0	8.702	0.608084	0.0850631	1.08879
Genova	Italy	0.921	0	0	53.579	0.605601	0.0875464	1.09149
Mexico	Mexico	8.831	6	1	52.03	6.37573	0.0883411	1.09236
Miskolc	Hungary	0.181	0	0	10.366	0.601944	0.091203	1.09549
Shenyang	China	3.156	0	0	824.788	0.600691	0.0924559	1.09686
Washington	USA	2.488	16	1	209.588	16.1653	0.0945172	1.09913
Lille	France	0.906	0	0	50.844	0.593216	0.0999313	1.10509
Bucharest	Romania	1.396	20	1	20.549	17.9478	0.10939	1.1156
Newcastle	UK	0.886	0	0	55.635	0.576785	0.116362	1.1234
Lublin	Poland	0.233	1	0	32.636	0.827116	0.118123	1.12538
Madras	India	3.044	0	0	553.579	0.573991	0.119156	1.12655
Algiers	Algeria	1.281	1	1	14.55	0.833752	0.12325	1.13117
Gliwice	Poland	0.172	0	0	32.636	0.564526	0.128621	1.13726
Antwerpen	Belgium	0.855	0	0	9.632	0.551506	0.141641	1.15216
Debrecen	Hungary	0.168	0	0	10.366	0.548056	0.145091	1.15614
Bialystok	Poland	0.168	0	0	32.636	0.548056	0.145091	1.15614
Delhi	India	3.531	17	1	553.579	14.4951	0.149936	1.16176
Skopje	Yugoslavia	0.302	0	0	20.215	0.518179	0.174968	1.19121
Philadelphia	USA	4.396	2	0	209.588	2.29507	0.177888	1.19469
Lima	Peru	2.98	1	1	13.341	1.37745	0.181727	1.19929
Radom	Poland	0.159	0	0	32.636	0.51137	0.181777	1.19935
Stara Zagora	Bulgaria	0.101	0	0	8.507	0.505493	0.187654	1.20642
Brno	Czechoslovakia	0.333	2	0	14.357	2.26822	0.189767	1.20897
Wroclaw	Poland	0.519	2	0	32.636	2.26583	0.190817	1.21024
Sydney	Australia	2.892	1	0	12.843	1.35506	0.194656	1.21489
Halle	East Germany	0.257	1	0	17.068	0.935713	0.195063	1.21539
Chorzow	Poland	0.152	0	0	32.636	0.483204	0.209943	1.23361
Milwakee	USA	1.251	0	0	209.588	0.472062	0.221085	1.24743
Pecs	Hungary	0.149	0	0	10.366	0.471234	0.221913	1.24846
Tampere	Finland	0.154	1	0	4.612	0.987858	0.227337	1.25525
Bologna	Italy	0.743	0	0	53.579	0.46219	0.230957	1.25981
Copenhagen	Denmark	1.38	2	1	4.931	2.16783	0.233254	1.2627
Szeged	Hungary	0.145	0	0	10.366	0.455371	0.237776	1.26843
Sosnowiec	Poland	0.145	0	0	32.636	0.455371	0.237776	1.26843
San Diego	USA	1.209	0	0	209.588	0.452207	0.24094	1.27244
Cincinnati	USA	1.202	0	0	209.588	0.448915	0.244233	1.27664
Ruda Slaska	Poland	0.142	0	0	32.636	0.443548	0.249599	1.28351
Atlanta	USA	1.182	0	0	209.588	0.439536	0.253611	1.28867
Zurich	Switzerland	0.711	0	0	6.169	0.437283	0.255864	1.29158
Essen	West Germany	0.698	0	0	61.505	0.427246	0.265901	1.30461
Damascus	Syria	0.914	0	1	6.351	0.405619	0.287528	1.33313
Nottingham	UK	0.666	0	0	55.635	0.402747	0.290401	1.33696
Nairobi	Kenya	0.531	0	1	11.252	0.400658	0.292489	1.33976
Torun	Poland	0.13	0	0	32.636	0.396908	0.296239	1.34479
Sheffield	UK	0.658	0	0	55.635	0.396669	0.296479	1.34511
Kansas City	USA	1.086	0	0	209.588	0.395097	0.298051	1.34723
Buffalo	USA	1.084	0	0	209.588	0.394181	0.298966	1.34846
Katowice	Poland	0.305	1	0	32.636	1.1607	0.302879	1.35375
Valencia	Spain	0.645	0	0	33.98	0.386832	0.306315	1.35841
Kielce	Poland	0.127	0	0	32.636	0.385417	0.30773	1.36033
Nice+Cannes	France	0.637	0	0	50.844	0.380805	0.312342	1.36662
Denver	USA	1.054	0	0	209.588	0.380503	0.312644	1.36703
Stuttgart	West Germany	0.633	0	0	61.505	0.377798	0.315349	1.37074
Zwickau	East Germany	0.125	0	0	17.068	0.377795	0.315352	1.37074
Walbrzych	Poland	0.125	0	0	32.636	0.377795	0.315352	1.37074
Guatemala City	Guatemala	0.917	0	1	5.622	0.377732	0.315415	1.37083
Vancouver	Canada	1.045	0	0	21.453	0.37642	0.316728	1.37263
Liege	Belgium	0.619	0	0	9.632	0.367314	0.325833	1.38518
Potsdam	East Germany	0.119	0	0	17.068	0.35512	0.338028	1.40218
Singapore	Singapore	2.072	0	1	2.072	0.353749	0.339398	1.4041
Gera	East Germany	0.117	0	0	17.068	0.347626	0.345522	1.41273
Wuhan	China	2.039	0	0	824.788	0.346674	0.346473	1.41407
Bordeaux	France	0.584	0	0	50.844	0.341374	0.351774	1.42159
Bremen	West Germany	0.582	0	0	61.505	0.339903	0.353244	1.42368
Bristol	UK	0.578	0	0	55.635	0.336966	0.356181	1.42787
Lahore	Pakistan	1.964	0	0	123.139	0.330705	0.362442	1.43683
Montevideo	Uruguay	1.362	0	1	2.81	0.322633	0.370515	1.44848
Timisoara	Romania	0.207	0	0	20.549	0.322157	0.37099	1.44917
Iasi	Romania	0.207	0	0	20.549	0.322157	0.37099	1.44917
Bergamo	Italy	0.555	0	0	53.579	0.320181	0.372966	1.45203
Lens-Douai	France	0.549	0	0	50.844	0.315832	0.377316	1.45837
Tunis	Tunisia	0.761	0	1	5.06	0.313682	0.379465	1.4615
Thessaloniki	Greece	0.542	0	0	8.66	0.310773	0.382374	1.46576
Sevilla	Spain	0.542	0	0	33.98	0.310773	0.382374	1.46576
Bari	Italy	0.542	0	0	53.579	0.310773	0.382374	1.46576
Bielsko-Biala	Poland	0.106	0	0	32.636	0.307012	0.386136	1.47128
Busan	South Korea	1.813	0	0	32.209	0.299035	0.394112	1.48307
Hannover	West Germany	0.524	0	0	61.505	0.297842	0.395305	1.48484
Gyor	Hungary	0.103	0	0	10.366	0.296118	0.397029	1.4874
Galati	Romania	0.19	0	0	20.549	0.289226	0.403921	1.49769
Schwerin	East Germany	0.101	0	0	17.068	0.288901	0.404246	1.49817
Hyderabad	India	1.748	0	0	553.579	0.285607	0.40754	1.50312
Padova	Italy	0.504	0	0	53.579	0.283608	0.409539	1.50612
Gotheborg	Sweden	0.5	0	0	8.055	0.280779	0.412368	1.51039
Haerbin	China	1.696	0	0	824.788	0.274958	0.41819	1.51921
Ahmedabad	India	1.695	0	0	553.579	0.274754	0.418394	1.51952
Brasov	Romania	0.182	0	0	20.549	0.273986	0.419161	1.52069
Craiova	Romania	0.181	0	0	20.549	0.272093	0.421054	1.52357
Tel Aviv	Israel	1.029	0	1	2.85	0.270687	0.42246	1.52571
Quito	Ecuador	0.501	0	1	6.073	0.266075	0.427072	1.53276
Recife	Brazil	1.638	0	0	95.327	0.263178	0.429969	1.53721
Bangalore	India	1.615	0	0	553.579	0.258537	0.434611	1.54436
Abidjan	Cote d'Ivoire	0.548	0	1	5.242	0.25829	0.434857	1.54474
La Paz	Bolivia	0.606	0	1	4.506	0.251911	0.441236	1.55463
Ploiesti	Romania	0.17	0	0	20.549	0.251451	0.441696	1.55534
Dakar	Senegal	0.61	0	1	4.258	0.244527	0.448621	1.56615
Guangzhou	China	1.542	0	0	824.788	0.243918	0.449229	1.5671
Braila	Romania	0.164	0	0	20.549	0.240335	0.452812	1.57273
Guadalajara	Mexico	1.506	0	0	52.03	0.236774	0.456373	1.57834
Belo Horizonte	Brazil	1.485	0	0	95.327	0.232627	0.46052	1.5849
Sapporo	Japan	1.479	0	0	104.926	0.231445	0.461702	1.58677
Surabaya	Indonesia	1.474	0	0	114.835	0.230461	0.462686	1.58833
Nanjing	China	1.459	0	0	824.788	0.227514	0.465633	1.59302
Taibei	Taiwan	1.406	0	0	14.693	0.217163	0.475984	1.6096
Porto Alegre	Brazil	1.398	0	0	95.327	0.21561	0.477537	1.6121
Arad	Romania	0.146	0	0	20.549	0.207627	0.485521	1.62502
Oradea	Romania	0.144	0	0	20.549	0.204054	0.489093	1.63084
Novi Sad	Yugoslavia	0.141	0	0	20.215	0.198719	0.494428	1.63956
Monterrey	Mexico	1.299	0	0	52.03	0.196576	0.496571	1.64308
San Salvador	El Salvador	0.5	0	1	3.669	0.196209	0.496939	1.64368
Sendai	Japan	1.264	0	0	104.926	0.189934	0.503213	1.65403
Medellin	Colombia	1.26	0	0	22.061	0.189178	0.503969	1.65528
New Taipei	Taiwan	1.255	0	0	14.693	0.188234	0.504913	1.65684
Kanhpur	India	1.25	0	0	553.579	0.187291	0.505856	1.6584
Split	Yugoslavia	0.129	0	0	20.215	0.177677	0.51547	1.67443
Rijeka	Yugoslavia	0.129	0	0	20.215	0.177677	0.51547	1.67443
Nis	Yugoslavia	0.128	0	0	20.215	0.175946	0.517202	1.67733
Sibiu	Romania	0.128	0	0	20.549	0.175946	0.517202	1.67733
Dalian	China	1.177	0	0	824.788	0.173633	0.519514	1.68121
Asuncion	Paraguay	0.553	0	1	2.474	0.165363	0.527784	1.69517
Cape Town	South Africa	1.114	0	0	22.839	0.16202	0.531127	1.70085
Pune	India	1.105	0	0	553.579	0.160375	0.532772	1.70365
Salvador	Brazil	1.069	0	0	95.327	0.153828	0.539319	1.71484
Jinan	China	1.06	0	0	824.788	0.1522	0.540947	1.71763
Daegu	South Korea	1.048	0	0	32.209	0.150035	0.543112	1.72136
Kragujevac	Yugoslavia	0.112	0	0	20.215	0.148732	0.544415	1.7236
Hangzhou	China	1.025	0	0	824.788	0.145904	0.547243	1.72848
Osijek	Yugoslavia	0.109	0	0	20.215	0.143737	0.54941	1.73223
Pristina	Yugoslavia	0.105	0	0	20.215	0.137131	0.556016	1.74371
Targu Mures	Romania	0.105	0	0	20.549	0.137131	0.556016	1.74371
X'ian	China	0.96	0	0	824.788	0.134358	0.558789	1.74855
Qingdao	China	0.906	0	0	824.788	0.124918	0.568229	1.76514
Lanzhou	China	0.863	0	0	824.788	0.117504	0.575643	1.77827
Fushun	China	0.829	0	0	824.788	0.111709	0.581438	1.78861
Anshan	China	0.813	0	0	824.788	0.109003	0.584145	1.79346
Wenzhou	China	0.767	0	0	824.788	0.101299	0.591848	1.80733
Baotou	China	0.754	0	0	824.788	0.0991437	0.594004	1.81123
Changsha	China	0.731	0	0	824.788	0.0953532	0.597794	1.8181
Guiyang	China	0.722	0	0	824.788	0.0938783	0.599269	1.82079
Shijiazhuang	China	0.692	0	0	824.788	0.0889965	0.604151	1.8297
Tangshan	China	0.646	0	0	824.788	0.0816173	0.61153	1.84325
Kuwait City	Kuwait	0.553	0	1	0.747	0.0804328	0.612714	1.84543
Taiyuan	China	0.622	0	0	824.788	0.0778202	0.615327	1.85026
Nanchang	China	0.615	0	0	824.788	0.0767198	0.616427	1.8523
Jilin	China	0.606	0	0	824.788	0.0753097	0.617837	1.85491
Wuxi	China	0.603	0	0	824.788	0.0748409	0.618306	1.85578
Qiqihaer	China	0.591	0	0	824.788	0.0729716	0.620176	1.85926
Urumqhi	China	0.581	0	0	824.788	0.0714213	0.621726	1.86214
Yichun	China	0.578	0	0	824.788	0.0709576	0.62219	1.863
Xuzhou	China	0.557	0	0	824.788	0.0677289	0.625418	1.86903
Fuzhou	China	0.549	0	0	824.788	0.0665071	0.62664	1.87131
Hefei	China	0.518	0	0	824.788	0.0618166	0.631331	1.88011
Huainan	China	0.508	0	0	824.788	0.0603187	0.632829	1.88293
Zhengzhou	China	0.508	0	0	824.788	0.0603187	0.632829	1.88293
Benxi	China	0.505	0	0	824.788	0.0598708	0.633276	1.88377
